# Supplementary material for: Designing metal hydride complexes for water splitting reactions: a molecular electrostatic potential approach
Source: Royal Society of Chemistry journal article supplement (doi:10.1039/c4dt01343c), 2014-01-01
Supplement: c4dt01343c1.pdf [file c4dt01343c1.pdf]

## Designing metal hydride complexes for water splitting reactions: A molecular electrostatic potential approach

*K. S. Sandhya and Cherumuttathu H. Suresh\**

Inorganic and Theoretical Chemistry Section, CSTD, CSIR-National Institute for  
Interdisciplinary Science and Technology, Trivandrum-695019, India

\* To whom correspondence should be addressed. E-mail: sureshch@gmail.com, Phone: +91-471-2535506

1. **Figure S1.** Correlation between  $V_{\min}$  of Ru hydride complexes at B3LYP and TPSS level. S2
2. **Figure S2.** Correlation between  $V_{\text{H}}$  (kcal/mol) and  $\Psi$  (in angle) of DHB complexes. S2
3. **Figure S3.** Correlation between  $d_{\text{H-H}}$  (kcal/mol) and  $V_{\min}$  (in kcal/mol) of DHB complexes. S3
4. **Figure S4.** Higher derivative of W complexes with  $V_{\min}$  Studied at B3LYP level. S3
5. Cartesian coordinates (Ångstrom) of all optimized geometric structure with energy values (A.U) at the bottom of each geometry. S4

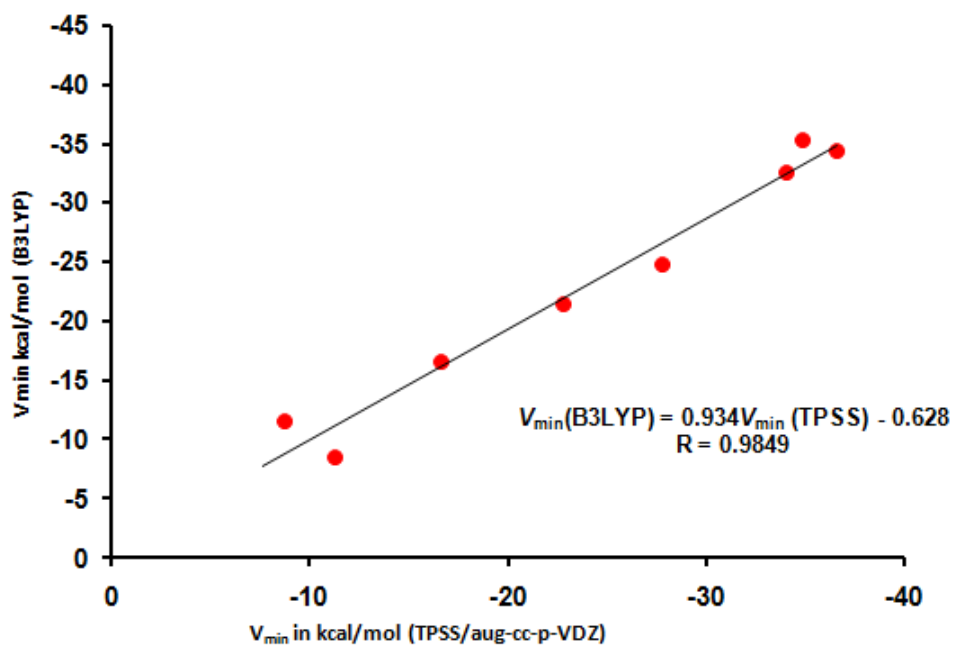

**Figure S1.** Correlation between  $V_{\text{H}}$  of Ru hydride complexes at B3LYP and TPSS level.

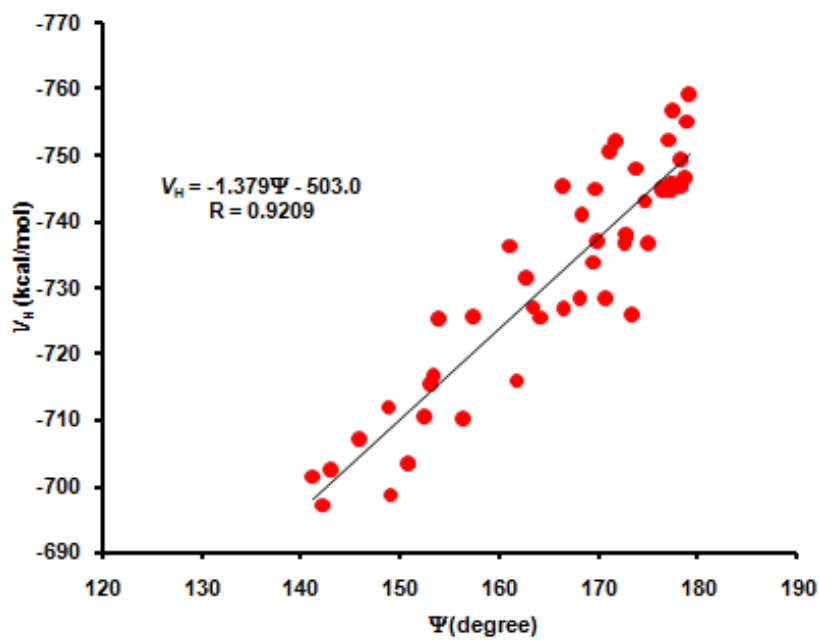

**Figure S2.** Correlation between  $V_{\text{H}}$  (kcal/mol) and H...H-O angle  $\Psi$  (in degrees) of DHB complexes.

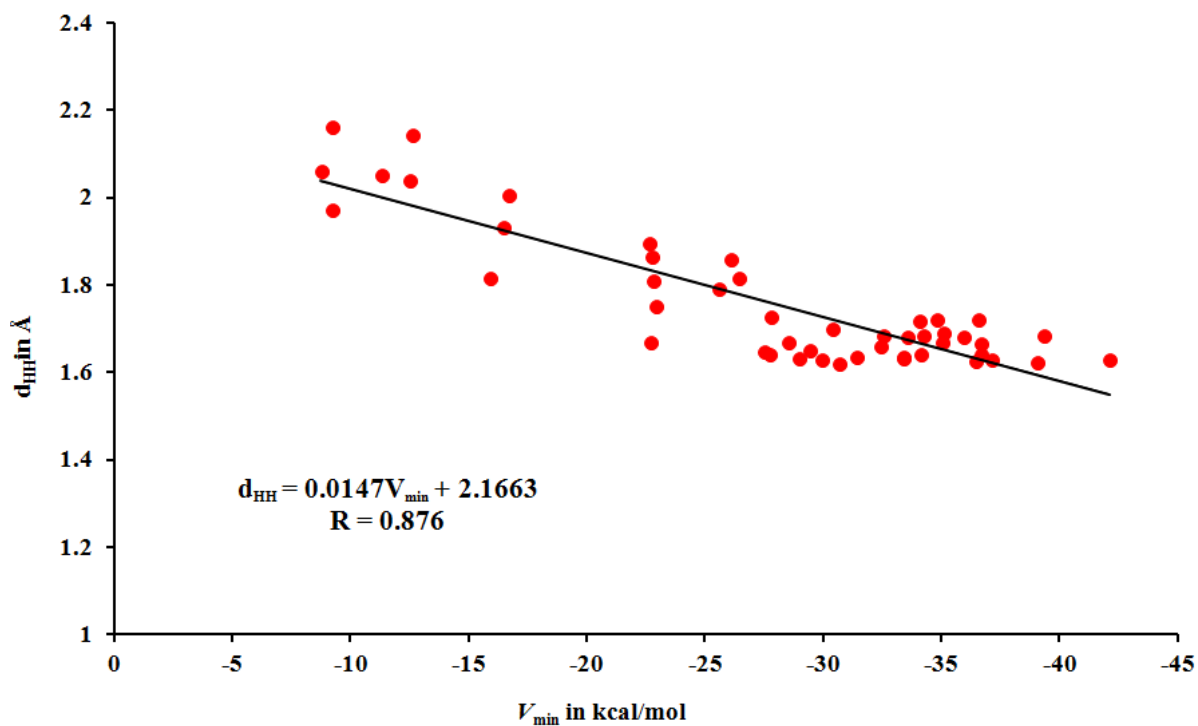

**Figure S3.** Correlation between  $d_{\text{H-H}}$  (kcal/mol) and  $V_{\text{min}}$  (in kcal/mol) of DHB complexes.

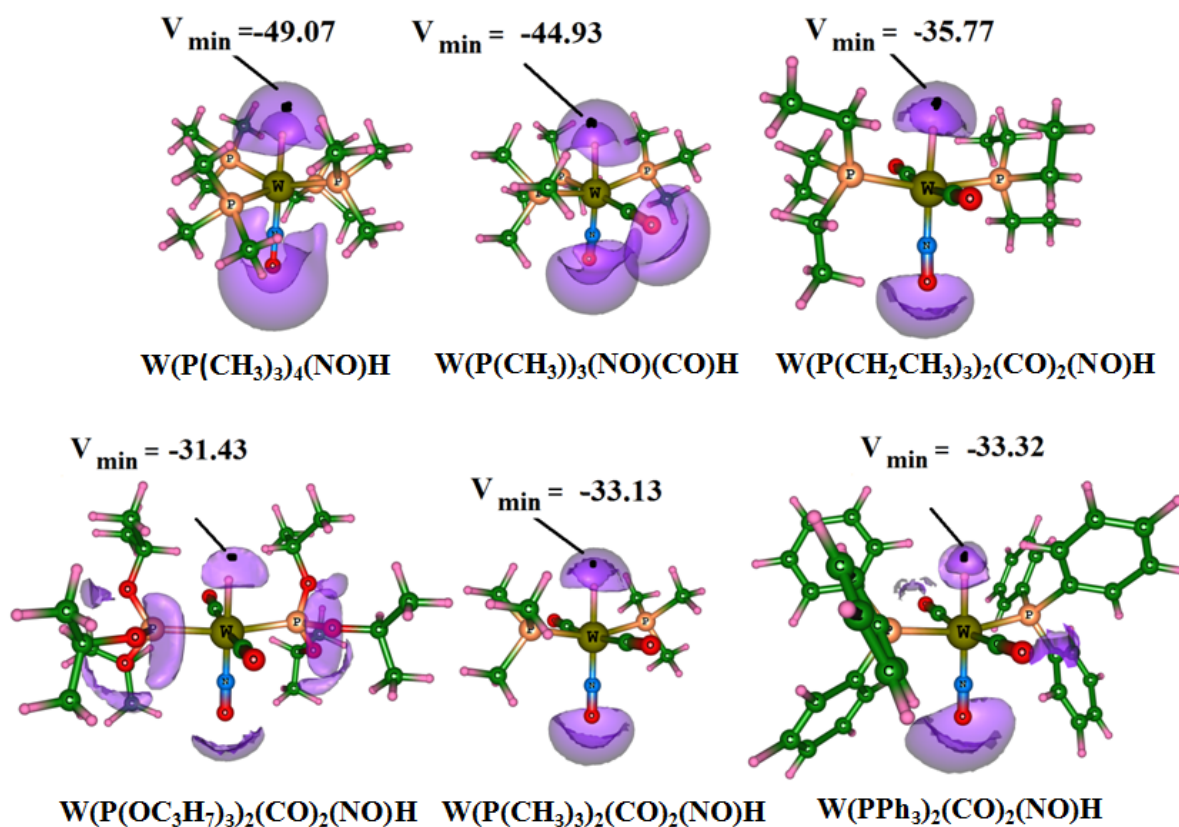

**Figure S4.**  $V_{\text{min}}$  values of the higher derivatives of W complexes.

5. Cartesian coordinates (Ångstrom) of all optimized geometric structure with energy values (A.U.) at the bottom of each geometry.

**1**

|    |              |              |              |
|----|--------------|--------------|--------------|
| 25 | -0.000210000 | 0.002267000  | -0.146952000 |
| 6  | 0.001913000  | -0.007594000 | 1.686278000  |
| 8  | 0.003022000  | -0.021676000 | 2.836586000  |
| 6  | -1.815407000 | 0.277972000  | -0.359430000 |
| 8  | -2.934640000 | 0.446428000  | -0.548000000 |
| 6  | 1.815098000  | -0.273866000 | -0.364383000 |
| 8  | 2.933953000  | -0.442479000 | -0.554433000 |
| 6  | -0.276671000 | -1.807639000 | -0.391836000 |
| 8  | -0.446915000 | -2.920881000 | -0.612080000 |
| 6  | 0.275617000  | 1.813911000  | -0.380204000 |
| 8  | 0.445263000  | 2.929177000  | -0.590543000 |
| 1  | -0.003516000 | 0.002075000  | -1.720998000 |

E(RB3LYP) = -671.225718681

Zero-point correction= 0.050601 (Hartree/Particle)

Thermal correction to Energy= 0.062352

Thermal correction to Enthalpy= 0.063296

Thermal correction to Gibbs Free Energy= 0.011400

Sum of electronic and zero-point Energies= -671.175118

Sum of electronic and thermal Energies= -671.163367

Sum of electronic and thermal Enthalpies= -671.162422

Sum of electronic and thermal Free Energies= -671.214318

**2a**

|    |              |              |              |
|----|--------------|--------------|--------------|
| 25 | 0.097605000  | 0.000410000  | -0.135372000 |
| 15 | -2.209932000 | -0.000622000 | -0.302070000 |
| 8  | 3.026038000  | -0.001645000 | -0.577937000 |
| 8  | 0.034811000  | -2.938266000 | -0.643689000 |
| 8  | 0.201364000  | 0.000525000  | 2.840002000  |
| 6  | 1.891163000  | -0.000609000 | -0.380894000 |
| 6  | 0.062677000  | -1.812450000 | -0.402974000 |
| 6  | 0.158741000  | 0.000485000  | 1.686645000  |
| 1  | -3.058998000 | -0.006042000 | 0.831797000  |
| 1  | -2.823972000 | -1.063309000 | -1.000828000 |
| 1  | -2.826240000 | 1.066448000  | -0.992172000 |
| 1  | -0.016349000 | 0.000715000  | -1.711775000 |
| 6  | 0.063202000  | 1.813307000  | -0.403299000 |
| 8  | 0.035252000  | 2.938995000  | -0.644445000 |

E(RB3LYP) = -901.042762274

Zero-point correction= 0.070401 (Hartree/Particle)

Thermal correction to Energy= 0.082861

Thermal correction to Enthalpy= 0.083805

Thermal correction to Gibbs Free Energy= 0.030474

Sum of electronic and zero-point Energies= -900.972361

Sum of electronic and thermal Energies= -900.959901

Sum of electronic and thermal Enthalpies= -900.958957

Sum of electronic and thermal Free Energies= -901.012288

**2b**

|    |             |             |              |
|----|-------------|-------------|--------------|
| 25 | 0.006393000 | 0.000555000 | -0.232875000 |
|----|-------------|-------------|--------------|

|    |              |              |              |
|----|--------------|--------------|--------------|
| 1  | 0.024004000  | 0.001993000  | -1.777695000 |
| 15 | -0.048718000 | -0.004393000 | 2.052442000  |
| 1  | -0.742533000 | 1.014527000  | 2.748950000  |
| 1  | -0.622874000 | -1.096731000 | 2.746625000  |
| 1  | 1.145490000  | 0.062496000  | 2.810224000  |
| 6  | -1.813919000 | -0.118057000 | -0.467680000 |
| 8  | -2.941015000 | -0.191158000 | -0.691555000 |
| 6  | 1.832776000  | 0.119992000  | -0.419720000 |
| 8  | 2.966372000  | 0.193827000  | -0.605352000 |
| 6  | -0.106451000 | 1.824236000  | -0.445219000 |
| 8  | -0.173890000 | 2.954814000  | -0.651657000 |
| 6  | 0.131554000  | -1.822172000 | -0.446367000 |
| 8  | 0.211421000  | -2.951763000 | -0.653803000 |

E(RB3LYP) = -901.036542997

|                                              |                             |
|----------------------------------------------|-----------------------------|
| Zero-point correction=                       | 0.069609 (Hartree/Particle) |
| Thermal correction to Energy=                | 0.082470                    |
| Thermal correction to Enthalpy=              | 0.083414                    |
| Thermal correction to Gibbs Free Energy=     | 0.026870                    |
| Sum of electronic and zero-point Energies=   | -900.966934                 |
| Sum of electronic and thermal Energies=      | -900.954073                 |
| Sum of electronic and thermal Enthalpies=    | -900.953129                 |
| Sum of electronic and thermal Free Energies= | -901.009673                 |

### 3a

|    |              |              |              |
|----|--------------|--------------|--------------|
| 25 | 0.000085000  | -0.000090000 | -0.112745000 |
| 8  | -0.001593000 | 0.002225000  | 2.855988000  |
| 8  | 0.001934000  | -2.939432000 | -0.599565000 |
| 6  | -0.000715000 | 0.001226000  | 1.697571000  |
| 6  | 0.001222000  | -1.807415000 | -0.367762000 |
| 1  | 0.000274000  | -0.001151000 | -1.705065000 |
| 15 | -2.251771000 | -0.001434000 | -0.383591000 |
| 1  | -2.847643000 | 1.059750000  | -1.103951000 |
| 1  | -3.154361000 | -0.000321000 | 0.710694000  |
| 1  | -2.846659000 | -1.065238000 | -1.100901000 |
| 6  | -0.000698000 | 1.806994000  | -0.369401000 |
| 8  | -0.001182000 | 2.938849000  | -0.601997000 |
| 15 | 2.252054000  | 0.000692000  | -0.382419000 |
| 1  | 2.848089000  | -1.062032000 | -1.100396000 |
| 1  | 3.154271000  | 0.001549000  | 0.712184000  |
| 1  | 2.847538000  | 1.062872000  | -1.101657000 |

E(RB3LYP) = -1130.85204547

|                                              |                             |
|----------------------------------------------|-----------------------------|
| Zero-point correction=                       | 0.089693 (Hartree/Particle) |
| Thermal correction to Energy=                | 0.103012                    |
| Thermal correction to Enthalpy=              | 0.103957                    |
| Thermal correction to Gibbs Free Energy=     | 0.048641                    |
| Sum of electronic and zero-point Energies=   | -1130.762352                |
| Sum of electronic and thermal Energies=      | -1130.749033                |
| Sum of electronic and thermal Enthalpies=    | -1130.748089                |
| Sum of electronic and thermal Free Energies= | -1130.803404                |

### 3b

|    |              |              |              |
|----|--------------|--------------|--------------|
| 25 | 0.075736000  | 0.000063000  | -0.216688000 |
| 15 | -2.230244000 | -0.003695000 | -0.319561000 |
| 1  | -2.870092000 | -1.073826000 | -0.985385000 |

|    |              |              |              |
|----|--------------|--------------|--------------|
| 1  | -3.067103000 | 0.008272000  | 0.829815000  |
| 1  | -2.870612000 | 1.051592000  | -1.008029000 |
| 1  | -0.101908000 | 0.000438000  | -1.762491000 |
| 15 | 0.268937000  | -0.001405000 | 2.048230000  |
| 1  | 0.940580000  | 1.053901000  | 2.714652000  |
| 1  | -0.876371000 | -0.003435000 | 2.889949000  |
| 1  | 0.943163000  | -1.056150000 | 2.712886000  |
| 6  | 0.032293000  | 1.811298000  | -0.456437000 |
| 8  | -0.002038000 | 2.941902000  | -0.691540000 |
| 6  | 0.040372000  | -1.811051000 | -0.458513000 |
| 8  | 0.010789000  | -2.941510000 | -0.694871000 |
| 6  | 1.849476000  | 0.004586000  | -0.522155000 |
| 8  | 2.978214000  | 0.007749000  | -0.773790000 |

E(RB3LYP) = -1130.84929664

|                                              |                             |
|----------------------------------------------|-----------------------------|
| Zero-point correction=                       | 0.089396 (Hartree/Particle) |
| Thermal correction to Energy=                | 0.102769                    |
| Thermal correction to Enthalpy=              | 0.103713                    |
| Thermal correction to Gibbs Free Energy=     | 0.048388                    |
| Sum of electronic and zero-point Energies=   | -1130.759900                |
| Sum of electronic and thermal Energies=      | -1130.746527                |
| Sum of electronic and thermal Enthalpies=    | -1130.745583                |
| Sum of electronic and thermal Free Energies= | -1130.800909                |

### 3c

|    |              |              |              |
|----|--------------|--------------|--------------|
| 25 | -0.000043000 | 0.111306000  | -0.122418000 |
| 8  | -0.000684000 | 0.207057000  | 2.851004000  |
| 8  | -2.077430000 | 2.160046000  | -0.610120000 |
| 6  | -0.000403000 | 0.166758000  | 1.694184000  |
| 6  | -1.271351000 | 1.362008000  | -0.388480000 |
| 1  | 0.000438000  | -0.036211000 | -1.701709000 |
| 15 | -1.630526000 | -1.486057000 | -0.363571000 |
| 1  | -2.757442000 | -1.156105000 | -1.149754000 |
| 1  | -2.342729000 | -2.061478000 | 0.720882000  |
| 1  | -1.309936000 | -2.702142000 | -1.015997000 |
| 6  | 1.268582000  | 1.364656000  | -0.388714000 |
| 8  | 2.072895000  | 2.164362000  | -0.610756000 |
| 15 | 1.633768000  | -1.482746000 | -0.362717000 |
| 1  | 1.315836000  | -2.699607000 | -1.015008000 |
| 1  | 2.346787000  | -2.056558000 | 0.722048000  |
| 1  | 2.760280000  | -1.150755000 | -1.148632000 |

E(RB3LYP) = -1130.85315317

|                                              |                             |
|----------------------------------------------|-----------------------------|
| Zero-point correction=                       | 0.089897 (Hartree/Particle) |
| Thermal correction to Energy=                | 0.103031                    |
| Thermal correction to Enthalpy=              | 0.103975                    |
| Thermal correction to Gibbs Free Energy=     | 0.049560                    |
| Sum of electronic and zero-point Energies=   | -1130.763256                |
| Sum of electronic and thermal Energies=      | -1130.750122                |
| Sum of electronic and thermal Enthalpies=    | -1130.749178                |
| Sum of electronic and thermal Free Energies= | -1130.803593                |

### 4a

|    |              |              |              |
|----|--------------|--------------|--------------|
| 25 | 0.000022000  | 0.009663000  | -0.186531000 |
| 15 | -2.241505000 | 0.000392000  | -0.480671000 |
| 1  | -2.802833000 | -0.989170000 | -1.322654000 |

|    |              |              |              |
|----|--------------|--------------|--------------|
| 1  | -3.182698000 | -0.144719000 | 0.578826000  |
| 1  | -2.861318000 | 1.118523000  | -1.089014000 |
| 15 | 2.241548000  | 0.000440000  | -0.480687000 |
| 1  | 2.861125000  | 1.118029000  | -1.090253000 |
| 1  | 3.182904000  | -0.143476000 | 0.578832000  |
| 1  | 2.802929000  | -0.989914000 | -1.321707000 |
| 1  | 0.000168000  | 0.025396000  | -1.756600000 |
| 15 | 0.000021000  | -0.029601000 | 2.077169000  |
| 1  | -1.051736000 | -0.663481000 | 2.794804000  |
| 1  | 1.051092000  | -0.664666000 | 2.794747000  |
| 1  | 0.000701000  | 1.155632000  | 2.859766000  |
| 6  | -0.000009000 | -1.795577000 | -0.426264000 |
| 8  | -0.000069000 | -2.931210000 | -0.662475000 |
| 6  | -0.000037000 | 1.819389000  | -0.397703000 |
| 8  | -0.000128000 | 2.959326000  | -0.607130000 |

E(RB3LYP) = -1360.65336915

|                                              |                             |
|----------------------------------------------|-----------------------------|
| Zero-point correction=                       | 0.108328 (Hartree/Particle) |
| Thermal correction to Energy=                | 0.122616                    |
| Thermal correction to Enthalpy=              | 0.123560                    |
| Thermal correction to Gibbs Free Energy=     | 0.065538                    |
| Sum of electronic and zero-point Energies=   | -1360.545041                |
| Sum of electronic and thermal Energies=      | -1360.530753                |
| Sum of electronic and thermal Enthalpies=    | -1360.529809                |
| Sum of electronic and thermal Free Energies= | -1360.587832                |

#### 4b

|    |              |              |              |
|----|--------------|--------------|--------------|
| 25 | 0.000002000  | 0.067240000  | -0.102573000 |
| 8  | -0.000982000 | 0.094538000  | 2.866105000  |
| 8  | -0.002658000 | 2.991328000  | -0.527127000 |
| 6  | -0.000543000 | 0.083101000  | 1.704409000  |
| 6  | -0.001638000 | 1.847705000  | -0.331215000 |
| 1  | 0.000465000  | -0.028731000 | -1.701006000 |
| 15 | 2.235486000  | 0.109956000  | -0.423796000 |
| 1  | 2.873229000  | -0.969066000 | -1.090054000 |
| 1  | 3.181003000  | 0.223509000  | 0.631099000  |
| 1  | 2.769629000  | 1.142287000  | -1.230368000 |
| 15 | -2.235483000 | 0.105896000  | -0.424483000 |
| 1  | -2.770913000 | 1.135476000  | -1.233708000 |
| 1  | -3.181132000 | 0.220978000  | 0.630114000  |
| 1  | -2.871899000 | -0.975622000 | -1.087995000 |
| 15 | 0.002200000  | -2.210727000 | -0.345534000 |
| 1  | -1.054256000 | -2.823520000 | -1.066386000 |
| 1  | 0.003241000  | -3.133573000 | 0.735453000  |
| 1  | 1.059744000  | -2.821376000 | -1.066616000 |

E(RB3LYP) = -1360.65779169

|                                              |              |
|----------------------------------------------|--------------|
| Zero-point correction=                       | 0.109164     |
| Thermal correction to Energy=                | 0.122981     |
| Thermal correction to Enthalpy=              | 0.123925     |
| Thermal correction to Gibbs Free Energy=     | 0.068393     |
| Sum of electronic and zero-point Energies=   | -1360.548627 |
| Sum of electronic and thermal Energies=      | -1360.534810 |
| Sum of electronic and thermal Enthalpies=    | -1360.533866 |
| Sum of electronic and thermal Free Energies= | -1360.589399 |

**4c**

|    |              |              |              |
|----|--------------|--------------|--------------|
| 25 | 0.000042000  | 0.090995000  | -0.201717000 |
| 15 | 1.631957000  | -1.506920000 | -0.386441000 |
| 1  | 2.739002000  | -1.220034000 | -1.218137000 |
| 1  | 2.388221000  | -2.016503000 | 0.707936000  |
| 1  | 1.317113000  | -2.768408000 | -0.953526000 |
| 15 | -1.632966000 | -1.505896000 | -0.386201000 |
| 1  | -1.319216000 | -2.767489000 | -0.953644000 |
| 1  | -2.389597000 | -2.015045000 | 0.708121000  |
| 1  | -2.739819000 | -1.217859000 | -1.217751000 |
| 1  | -0.000332000 | -0.128296000 | -1.753505000 |
| 15 | 0.000280000  | 0.266088000  | 2.056109000  |
| 1  | 0.000665000  | 1.541533000  | 2.676538000  |
| 1  | -1.052047000 | -0.274994000 | 2.846288000  |
| 1  | 1.052357000  | -0.275591000 | 2.846216000  |
| 6  | -1.262659000 | 1.333128000  | -0.494833000 |
| 8  | -2.067261000 | 2.130263000  | -0.747360000 |
| 6  | 1.263395000  | 1.332432000  | -0.494959000 |
| 8  | 2.068401000  | 2.129159000  | -0.747497000 |

E(RB3LYP) = -1360.65601507

Zero-point correction= 0.108733

Thermal correction to Energy= 0.122678

Thermal correction to Enthalpy= 0.123622

Thermal correction to Gibbs Free Energy= 0.067824

Sum of electronic and zero-point Energies= -1360.547282

Sum of electronic and thermal Energies= -1360.533337

Sum of electronic and thermal Enthalpies= -1360.532393

Sum of electronic and thermal Free Energies= -1360.588191

**5a**

|    |              |              |              |
|----|--------------|--------------|--------------|
| 25 | -0.000020000 | 0.000007000  | -0.091470000 |
| 6  | -0.000526000 | -0.000435000 | 1.707110000  |
| 8  | -0.000924000 | -0.000766000 | 2.873247000  |
| 15 | -1.180593000 | 1.900198000  | -0.384403000 |
| 1  | -2.400055000 | 1.862872000  | -1.112589000 |
| 1  | -1.676042000 | 2.701872000  | 0.682284000  |
| 1  | -0.607209000 | 2.975115000  | -1.115634000 |
| 15 | 1.900317000  | 1.180698000  | -0.383465000 |
| 1  | 1.863002000  | 2.400834000  | -1.110556000 |
| 1  | 2.701991000  | 1.675184000  | 0.683657000  |
| 1  | 2.975258000  | 0.608007000  | -1.115210000 |
| 15 | 1.181050000  | -1.899846000 | -0.384525000 |
| 15 | -1.900230000 | -1.180619000 | -0.384395000 |
| 1  | 2.397581000  | -1.862741000 | -1.117564000 |
| 1  | 1.681611000  | -2.698389000 | 0.682121000  |
| 1  | 0.606138000  | -2.977243000 | -1.110946000 |
| 1  | -1.862720000 | -2.400417000 | -1.112024000 |
| 1  | -2.701915000 | -1.675652000 | 0.682469000  |
| 1  | -2.975155000 | -0.607637000 | -1.115919000 |
| 1  | 0.000394000  | 0.000291000  | -1.710158000 |

E(RB3LYP) = -1590.45715731

Zero-point correction= 0.128048 (Hartree/Particle)

Thermal correction to Energy= 0.142531

Thermal correction to Enthalpy= 0.143475



Thermal correction to Gibbs Free Energy= 0.086874  
 Sum of electronic and zero-point Energies= -1590.329109  
 Sum of electronic and thermal Energies= -1590.314626  
 Sum of electronic and thermal Enthalpies= -1590.313682  
 Sum of electronic and thermal Free Energies= -1590.370283

**5b**

|    |              |              |              |
|----|--------------|--------------|--------------|
| 25 | 0.000107000  | 0.052870000  | -0.176500000 |
| 15 | 2.226184000  | 0.094491000  | -0.503873000 |
| 1  | 2.742706000  | 1.064396000  | -1.397005000 |
| 1  | 3.191786000  | 0.316703000  | 0.523279000  |
| 1  | 2.890805000  | -1.022233000 | -1.080325000 |
| 15 | -0.002217000 | -2.226618000 | -0.361917000 |
| 15 | -2.225855000 | 0.098770000  | -0.504083000 |
| 1  | 1.053389000  | -2.866807000 | -1.062869000 |
| 1  | -0.004423000 | -3.130326000 | 0.742278000  |
| 1  | -1.058095000 | -2.864151000 | -1.064861000 |
| 1  | -2.892205000 | -1.015637000 | -1.082988000 |
| 1  | -3.191315000 | 0.320485000  | 0.523326000  |
| 1  | -2.740594000 | 1.071423000  | -1.395262000 |
| 1  | -0.000050000 | -0.086347000 | -1.754559000 |
| 15 | -0.000032000 | 0.141801000  | 2.076073000  |
| 1  | 1.051306000  | 0.784140000  | 2.789773000  |
| 1  | -1.049608000 | 0.787602000  | 2.789231000  |
| 1  | -0.002171000 | -1.030315000 | 2.888297000  |
| 6  | 0.001802000  | 1.825812000  | -0.418775000 |
| 8  | 0.002971000  | 2.970972000  | -0.635774000 |

E(RB3LYP) = -1590.45632850

Zero-point correction= 0.127787 (Hartree/Particle)  
 Thermal correction to Energy= 0.142393  
 Thermal correction to Enthalpy= 0.143337  
 Thermal correction to Gibbs Free Energy= 0.086533  
 Sum of electronic and zero-point Energies= -1590.328541  
 Sum of electronic and thermal Energies= -1590.313936  
 Sum of electronic and thermal Enthalpies= -1590.312992  
 Sum of electronic and thermal Free Energies= -1590.369795

**6**

|    |              |              |              |
|----|--------------|--------------|--------------|
| 25 | 0.000486000  | 0.001746000  | -0.157018000 |
| 15 | -0.266833000 | 2.219183000  | -0.424642000 |
| 1  | -1.388061000 | 2.704087000  | -1.154227000 |
| 1  | -0.375126000 | 3.188829000  | 0.620834000  |
| 1  | 0.704519000  | 2.950029000  | -1.164364000 |
| 15 | 2.213784000  | 0.290611000  | -0.430483000 |
| 1  | 2.681627000  | 1.379609000  | -1.217518000 |
| 1  | 3.156518000  | 0.488739000  | 0.626391000  |
| 1  | 2.983741000  | -0.702391000 | -1.098825000 |
| 15 | 0.278653000  | -2.201311000 | -0.493817000 |
| 15 | -2.212325000 | -0.253756000 | -0.456067000 |
| 1  | 1.389267000  | -2.666160000 | -1.251441000 |
| 1  | 0.424097000  | -3.166346000 | 0.552320000  |
| 1  | -0.700824000 | -2.940260000 | -1.214306000 |
| 1  | -2.715438000 | -1.401580000 | -1.130073000 |
| 1  | -3.179333000 | -0.290645000 | 0.596989000  |

|    |              |              |              |
|----|--------------|--------------|--------------|
| 1  | -2.924287000 | 0.692173000  | -1.245183000 |
| 1  | 0.007167000  | 0.034518000  | -1.760595000 |
| 15 | -0.014171000 | -0.059079000 | 2.087040000  |
| 1  | 0.891026000  | 0.711527000  | 2.877689000  |
| 1  | -1.165836000 | 0.308940000  | 2.846542000  |
| 1  | 0.212167000  | -1.269443000 | 2.810731000  |

E(RB3LYP) = -1820.25114302

|                                              |                             |
|----------------------------------------------|-----------------------------|
| Zero-point correction=                       | 0.146197 (Hartree/Particle) |
| Thermal correction to Energy=                | 0.161534                    |
| Thermal correction to Enthalpy=              | 0.162478                    |
| Thermal correction to Gibbs Free Energy=     | 0.103775                    |
| Sum of electronic and zero-point Energies=   | -1820.104946                |
| Sum of electronic and thermal Energies=      | -1820.089609                |
| Sum of electronic and thermal Enthalpies=    | -1820.088665                |
| Sum of electronic and thermal Free Energies= | -1820.147368                |

7

|    |              |              |              |
|----|--------------|--------------|--------------|
| 25 | 0.764112000  | 0.000058000  | -0.158066000 |
| 15 | -0.853730000 | -1.597034000 | -0.435331000 |
| 15 | -0.853783000 | 1.597319000  | -0.434350000 |
| 8  | 2.812492000  | -2.106220000 | -0.499695000 |
| 8  | 0.663119000  | -0.000246000 | 2.813147000  |
| 8  | 2.812464000  | 2.106126000  | -0.501009000 |
| 6  | 2.015357000  | -1.284447000 | -0.334307000 |
| 6  | 0.683917000  | -0.000166000 | 1.652412000  |
| 6  | 2.015413000  | 1.284469000  | -0.334638000 |
| 6  | -2.581978000 | -1.298128000 | 0.202340000  |
| 1  | -3.206168000 | -2.156912000 | -0.063463000 |
| 1  | -2.514973000 | -1.271326000 | 1.296554000  |
| 6  | -3.228519000 | -0.000122000 | -0.314647000 |
| 1  | -3.241263000 | 0.000048000  | -1.413183000 |
| 1  | -4.281035000 | -0.000225000 | -0.006171000 |
| 6  | -2.582143000 | 1.297776000  | 0.202769000  |
| 1  | -2.515222000 | 1.270637000  | 1.296979000  |
| 1  | -3.206408000 | 2.156581000  | -0.062785000 |
| 1  | 0.819121000  | 0.000494000  | -1.732158000 |
| 1  | -1.155551000 | 2.025980000  | -1.748973000 |
| 1  | -0.634955000 | 2.883251000  | 0.119861000  |
| 1  | -0.634583000 | -2.883540000 | 0.117406000  |
| 1  | -1.155956000 | -2.024290000 | -1.750309000 |

E(RB3LYP) = -1247.60584047

|                                              |                             |
|----------------------------------------------|-----------------------------|
| Zero-point correction=                       | 0.159283 (Hartree/Particle) |
| Thermal correction to Energy=                | 0.174108                    |
| Thermal correction to Enthalpy=              | 0.175052                    |
| Thermal correction to Gibbs Free Energy=     | 0.116478                    |
| Sum of electronic and zero-point Energies=   | -1247.446558                |
| Sum of electronic and thermal Energies=      | -1247.431733                |
| Sum of electronic and thermal Enthalpies=    | -1247.430789                |
| Sum of electronic and thermal Free Energies= | -1247.489362                |

8

|    |              |              |              |
|----|--------------|--------------|--------------|
| 25 | -0.000024000 | -0.000049000 | 0.131776000  |
| 15 | 1.584587000  | -1.526528000 | -0.249419000 |
| 15 | 1.652345000  | 1.488848000  | -0.137437000 |

S10

|    |              |              |              |
|----|--------------|--------------|--------------|
| 15 | -1.652464000 | -1.488750000 | -0.137914000 |
| 15 | -1.584566000 | 1.526704000  | -0.248652000 |
| 6  | 0.000132000  | -0.000576000 | 1.923570000  |
| 8  | 0.000263000  | -0.000976000 | 3.092093000  |
| 1  | 2.242771000  | -2.280900000 | 0.765877000  |
| 1  | 1.376486000  | -2.621675000 | -1.129103000 |
| 6  | 3.072184000  | -0.724972000 | -1.070853000 |
| 6  | 3.311271000  | 0.639633000  | -0.413758000 |
| 1  | 1.619803000  | 2.388759000  | -1.236216000 |
| 1  | 2.051249000  | 2.454675000  | 0.827864000  |
| 1  | -2.051495000 | -2.454737000 | 0.827176000  |
| 1  | -1.619950000 | -2.388450000 | -1.236869000 |
| 6  | -3.311335000 | -0.639346000 | -0.414062000 |
| 6  | -3.072176000 | 0.725566000  | -1.070481000 |
| 1  | -1.376306000 | 2.622111000  | -1.127969000 |
| 1  | -2.242705000 | 2.280832000  | 0.766860000  |
| 1  | -0.000217000 | 0.000416000  | -1.487231000 |
| 1  | 2.806570000  | -0.600131000 | -2.125709000 |
| 1  | 3.957988000  | -1.364945000 | -1.015536000 |
| 1  | 3.758332000  | 0.507473000  | 0.578237000  |
| 1  | 3.989831000  | 1.265747000  | -1.000343000 |
| 1  | -3.758530000 | -0.507659000 | 0.577935000  |
| 1  | -3.989823000 | -1.265180000 | -1.001030000 |
| 1  | -2.806521000 | 0.601229000  | -2.125385000 |
| 1  | -3.957963000 | 1.365539000  | -1.014889000 |

E(RB3LYP) = -1745.33232773

Zero-point correction= 0.208417 (Hartree/Particle)

Thermal correction to Energy= 0.223988

Thermal correction to Enthalpy= 0.224932

Thermal correction to Gibbs Free Energy= 0.165888

Sum of electronic and zero-point Energies= -1745.123911

Sum of electronic and thermal Energies= -1745.108339

Sum of electronic and thermal Enthalpies= -1745.107395

Sum of electronic and thermal Free Energies= -1745.166440

**9**

|    |              |              |              |
|----|--------------|--------------|--------------|
| 25 | -0.000267000 | -0.000024000 | 0.158267000  |
| 15 | -1.587605000 | 1.529058000  | -0.229620000 |
| 15 | -1.662188000 | -1.486690000 | -0.118943000 |
| 15 | 1.662351000  | 1.486627000  | -0.117478000 |
| 15 | 1.587719000  | -1.528439000 | -0.230598000 |
| 7  | -0.000010000 | -0.001201000 | 2.008033000  |
| 7  | 0.000414000  | -0.001930000 | 3.135941000  |
| 1  | -2.290020000 | 2.260083000  | 0.777520000  |
| 1  | -1.361127000 | 2.642790000  | -1.080955000 |
| 6  | -3.040974000 | 0.731817000  | -1.114752000 |
| 6  | -3.307007000 | -0.636403000 | -0.475456000 |
| 1  | -1.592625000 | -2.416130000 | -1.190225000 |
| 1  | -2.108011000 | -2.425018000 | 0.856840000  |
| 1  | 2.108438000  | 2.423890000  | 0.859230000  |
| 1  | 1.592696000  | 2.417336000  | -1.187664000 |
| 6  | 3.307095000  | 0.636775000  | -0.475481000 |
| 6  | 3.040756000  | -0.730814000 | -1.115851000 |
| 1  | 1.361763000  | -2.642504000 | -1.081690000 |

S11

|   |              |              |              |
|---|--------------|--------------|--------------|
| 1 | 2.290503000  | -2.258989000 | 0.776646000  |
| 1 | -0.000381000 | 0.001281000  | -1.450154000 |
| 1 | -2.732787000 | 0.613834000  | -2.158583000 |
| 1 | -3.928628000 | 1.371257000  | -1.091342000 |
| 1 | -3.802072000 | -0.508334000 | 0.494136000  |
| 1 | -3.956830000 | -1.260840000 | -1.095364000 |
| 1 | 3.802677000  | 0.507838000  | 0.493742000  |
| 1 | 3.956481000  | 1.261952000  | -1.095089000 |
| 1 | 2.732093000  | -0.612054000 | -2.159445000 |
| 1 | 3.928288000  | -1.370455000 | -1.093261000 |

E(RB3LYP) = -1741.50817876

Zero-point correction= 0.208114

Thermal correction to Energy= 0.223875

Thermal correction to Enthalpy= 0.224819

Thermal correction to Gibbs Free Energy= 0.165638

Sum of electronic and zero-point Energies= -1741.300065

Sum of electronic and thermal Energies= -1741.284304

Sum of electronic and thermal Enthalpies= -1741.283360

Sum of electronic and thermal Free Energies= -1741.342541

## 10

|    |              |              |              |
|----|--------------|--------------|--------------|
| 25 | 0.000004000  | 0.000124000  | -0.095803000 |
| 15 | 0.888820000  | 2.058683000  | -0.375276000 |
| 1  | 0.163625000  | 3.044678000  | -1.096700000 |
| 1  | 1.264651000  | 2.917445000  | 0.699653000  |
| 1  | 2.099554000  | 2.206553000  | -1.103799000 |
| 15 | 2.059087000  | -0.888695000 | -0.373096000 |
| 1  | 3.044726000  | -0.165124000 | -1.096639000 |
| 1  | 2.917840000  | -1.260567000 | 0.703168000  |
| 1  | 2.207891000  | -2.101551000 | -1.097963000 |
| 15 | -0.888587000 | -2.058580000 | -0.375256000 |
| 15 | -2.059063000 | 0.888310000  | -0.373516000 |
| 1  | -0.163000000 | -3.044331000 | -1.096599000 |
| 1  | -1.263949000 | -2.917355000 | 0.699822000  |
| 1  | -2.099239000 | -2.206944000 | -1.103810000 |
| 1  | -3.043519000 | 0.165522000  | -1.099388000 |
| 1  | -2.919033000 | 1.257152000  | 0.702849000  |
| 1  | -2.208203000 | 2.102749000  | -1.095675000 |
| 1  | -0.000164000 | 0.000060000  | -1.702281000 |
| 7  | -0.000204000 | 0.000292000  | 1.760940000  |
| 7  | -0.000529000 | 0.000114000  | 2.887573000  |

E(RB3LYP) = -1586.63468934

Zero-point correction= 0.127730 (Hartree/Particle)

Thermal correction to Energy= 0.142400

Thermal correction to Enthalpy= 0.143345

Thermal correction to Gibbs Free Energy= 0.086582

Sum of electronic and zero-point Energies= -1586.506959

Sum of electronic and thermal Energies= -1586.492289

Sum of electronic and thermal Enthalpies= -1586.491345

Sum of electronic and thermal Free Energies= -1586.548108

## 11

|    |              |              |              |
|----|--------------|--------------|--------------|
| 75 | -0.000019000 | 0.000429000  | -0.131673000 |
| 6  | -0.000279000 | -0.002805000 | 1.864944000  |

|   |              |              |              |
|---|--------------|--------------|--------------|
| 8 | -0.000355000 | -0.005118000 | 3.017817000  |
| 6 | 1.993329000  | -0.008882000 | -0.321062000 |
| 8 | 3.129484000  | -0.014671000 | -0.488651000 |
| 6 | -0.009171000 | -1.991963000 | -0.328623000 |
| 8 | -0.014345000 | -3.127205000 | -0.502517000 |
| 1 | 0.000387000  | 0.005285000  | -1.862626000 |
| 6 | 0.009262000  | 1.993097000  | -0.324588000 |
| 8 | 0.014929000  | 3.128511000  | -0.497351000 |
| 6 | -1.993322000 | 0.009430000  | -0.321157000 |
| 8 | -3.129447000 | 0.014643000  | -0.489169000 |

E(RB+HF-LYP) = -646.482251401

|                                              |                             |
|----------------------------------------------|-----------------------------|
| Zero-point correction=                       | 0.049442 (Hartree/Particle) |
| Thermal correction to Energy=                | 0.061599                    |
| Thermal correction to Enthalpy=              | 0.062544                    |
| Thermal correction to Gibbs Free Energy=     | 0.008760                    |
| Sum of electronic and zero-point Energies=   | -646.432809                 |
| Sum of electronic and thermal Energies=      | -646.420652                 |
| Sum of electronic and thermal Enthalpies=    | -646.419708                 |
| Sum of electronic and thermal Free Energies= | -646.473491                 |

## 12

|    |              |              |              |
|----|--------------|--------------|--------------|
| 75 | 0.000020000  | 0.000082000  | 0.107219000  |
| 15 | -2.379119000 | -0.000351000 | 0.398308000  |
| 15 | 2.379172000  | 0.000032000  | 0.398233000  |
| 6  | -0.000037000 | 0.000047000  | -1.856343000 |
| 8  | -0.000121000 | -0.000262000 | -3.018392000 |
| 6  | -0.000192000 | 1.974334000  | 0.280057000  |
| 8  | -0.000345000 | 3.120057000  | 0.435855000  |
| 6  | 0.000163000  | -1.974172000 | 0.280193000  |
| 8  | 0.000205000  | -3.119897000 | 0.435968000  |
| 1  | -2.959946000 | -1.065461000 | 1.123249000  |
| 1  | -2.960804000 | 1.065402000  | 1.121622000  |
| 1  | -3.284423000 | -0.001526000 | -0.692049000 |
| 1  | 2.960162000  | -1.064868000 | 1.123349000  |
| 1  | 2.960678000  | 1.066006000  | 1.121367000  |
| 1  | 3.284492000  | -0.001194000 | -0.692111000 |
| 1  | 0.000011000  | -0.000121000 | 1.854170000  |

E(RB+HF-LYP) = -1106.1089267

|                                              |              |
|----------------------------------------------|--------------|
| Zero-point correction=                       | 0.089159     |
| Thermal correction to Energy=                | 0.102749     |
| Thermal correction to Enthalpy=              | 0.103693     |
| Thermal correction to Gibbs Free Energy=     | 0.046784     |
| Sum of electronic and zero-point Energies=   | -1106.019768 |
| Sum of electronic and thermal Energies=      | -1106.006178 |
| Sum of electronic and thermal Enthalpies=    | -1106.005234 |
| Sum of electronic and thermal Free Energies= | -1106.062143 |

## 13

|    |              |              |              |
|----|--------------|--------------|--------------|
| 75 | 0.000081000  | 0.082225000  | -0.119487000 |
| 15 | -1.736815000 | -1.638125000 | -0.293260000 |
| 15 | 1.734894000  | -1.640206000 | -0.293156000 |
| 6  | -0.000280000 | 0.185625000  | 1.846268000  |

|   |              |              |              |
|---|--------------|--------------|--------------|
| 8 | -0.000665000 | 0.227199000  | 3.006327000  |
| 6 | -1.371414000 | 1.436100000  | -0.366500000 |
| 8 | -2.187234000 | 2.237703000  | -0.550958000 |
| 6 | 1.373393000  | 1.434384000  | -0.365830000 |
| 8 | 2.190376000  | 2.234892000  | -0.549903000 |
| 1 | -2.864731000 | -1.339125000 | -1.087884000 |
| 1 | -1.402164000 | -2.873506000 | -0.897603000 |
| 1 | -2.428855000 | -2.166556000 | 0.824355000  |
| 1 | 2.863091000  | -1.342481000 | -1.087876000 |
| 1 | 1.398804000  | -2.875212000 | -0.897452000 |
| 1 | 2.426430000  | -2.169443000 | 0.824418000  |
| 1 | 0.000180000  | -0.160602000 | -1.847585000 |

E(RB+HF-LYP) = -1106.11192

|                                              |              |
|----------------------------------------------|--------------|
| Zero-point correction=                       | 0.089180     |
| Thermal correction to Energy=                | 0.102691     |
| Thermal correction to Enthalpy=              | 0.103635     |
| Thermal correction to Gibbs Free Energy=     | 0.047252     |
| Sum of electronic and zero-point Energies=   | -1106.022745 |
| Sum of electronic and thermal Energies=      | -1106.009234 |
| Sum of electronic and thermal Enthalpies=    | -1106.008290 |
| Sum of electronic and thermal Free Energies= | -1106.064673 |

#### 14

|    |              |              |              |
|----|--------------|--------------|--------------|
| 75 | -0.000015000 | -0.000061000 | -0.090942000 |
| 6  | -0.000049000 | 0.000598000  | 1.845305000  |
| 8  | 0.000253000  | 0.001129000  | 3.016072000  |
| 15 | 2.259266000  | -0.664699000 | -0.348985000 |
| 1  | 3.152121000  | 0.177123000  | -1.065297000 |
| 1  | 3.128166000  | -0.921131000 | 0.745776000  |
| 1  | 2.554755000  | -1.854070000 | -1.067720000 |
| 15 | -0.664620000 | -2.259239000 | -0.349480000 |
| 1  | 0.177441000  | -3.152057000 | -1.065541000 |
| 1  | -0.921799000 | -3.128404000 | 0.744916000  |
| 1  | -1.853673000 | -2.554309000 | -1.068913000 |
| 15 | -2.259295000 | 0.664456000  | -0.349078000 |
| 15 | 0.664617000  | 2.259039000  | -0.350279000 |
| 1  | -3.152333000 | -0.177625000 | -1.064842000 |
| 1  | -3.128074000 | 0.921659000  | 0.745599000  |
| 1  | -2.554536000 | 1.853493000  | -1.068464000 |
| 1  | -0.177579000 | 3.151582000  | -1.066515000 |
| 1  | 0.922070000  | 3.128581000  | 0.743748000  |
| 1  | 1.853541000  | 2.553673000  | -1.070073000 |
| 1  | -0.000257000 | 0.000083000  | -1.855084000 |

E(RB+HF-LYP) = -1565.71626

|                                            |              |
|--------------------------------------------|--------------|
| Zero-point correction=                     | 0.128602     |
| Thermal correction to Energy=              | 0.143090     |
| Thermal correction to Enthalpy=            | 0.144035     |
| Thermal correction to Gibbs Free Energy=   | 0.086571     |
| Sum of electronic and zero-point Energies= | -1565.587656 |
| Sum of electronic and thermal Energies=    | -1565.573167 |
| Sum of electronic and thermal Enthalpies=  | -1565.572223 |

Sum of electronic and thermal Free Energies= -1565.629686

**15**

|    |              |              |              |
|----|--------------|--------------|--------------|
| 75 | -0.000187000 | 0.000235000  | -0.098955000 |
| 7  | -0.004598000 | -0.003458000 | 1.902575000  |
| 7  | -0.004562000 | -0.006322000 | 3.032263000  |
| 15 | 0.556497000  | -2.281787000 | -0.342873000 |
| 1  | 1.653183000  | -2.645817000 | -1.168669000 |
| 1  | 0.902283000  | -3.126861000 | 0.751347000  |
| 1  | -0.384767000 | -3.170313000 | -0.930297000 |
| 15 | -2.284918000 | -0.553423000 | -0.330035000 |
| 1  | -2.646936000 | -1.763076000 | -0.982435000 |
| 1  | -3.165196000 | -0.708315000 | 0.779726000  |
| 1  | -3.139095000 | 0.293961000  | -1.085647000 |
| 15 | -0.552906000 | 2.284310000  | -0.339501000 |
| 15 | 2.284800000  | 0.553456000  | -0.324613000 |
| 1  | -1.675351000 | 2.652317000  | -1.128401000 |
| 1  | -0.852291000 | 3.139492000  | 0.760104000  |
| 1  | 0.373906000  | 3.160571000  | -0.966491000 |
| 1  | 2.647382000  | 1.762260000  | -0.978351000 |
| 1  | 3.165220000  | 0.709088000  | 0.785045000  |
| 1  | 3.138485000  | -0.295271000 | -1.079111000 |
| 1  | 0.009217000  | 0.004479000  | -1.823706000 |

E(RB+HF-LYP) = -1561.88254

Zero-point correction= 0.128655

Thermal correction to Energy= 0.143250

Thermal correction to Enthalpy= 0.144194

Thermal correction to Gibbs Free Energy= 0.086634

Sum of electronic and zero-point Energies= -1561.753886

Sum of electronic and thermal Energies= -1561.739291

Sum of electronic and thermal Enthalpies= -1561.738346

Sum of electronic and thermal Free Energies= -1561.795906

**16**

|    |              |              |              |
|----|--------------|--------------|--------------|
| 75 | 0.000018000  | -0.053640000 | -0.103110000 |
| 15 | -2.365282000 | -0.071682000 | -0.398045000 |
| 15 | 2.365246000  | -0.071341000 | -0.398259000 |
| 15 | -0.000283000 | 2.381299000  | -0.263564000 |
| 8  | 0.000067000  | -3.126999000 | -0.461058000 |
| 8  | 0.000243000  | -0.120134000 | 3.013350000  |
| 6  | 0.000152000  | -1.973809000 | -0.306021000 |
| 6  | 0.000194000  | -0.105893000 | 1.847533000  |
| 1  | -2.919608000 | -1.061757000 | -1.241940000 |
| 1  | -2.997825000 | 1.047325000  | -0.999083000 |
| 1  | -3.278891000 | -0.222937000 | 0.677022000  |
| 1  | 2.998715000  | 1.050682000  | -0.992728000 |
| 1  | 2.918949000  | -1.056863000 | -1.247876000 |
| 1  | 3.278602000  | -0.229528000 | 0.676006000  |
| 1  | -0.001141000 | 3.243690000  | 0.862643000  |
| 1  | -1.060115000 | 3.012970000  | -0.960567000 |
| 1  | 1.060450000  | 3.013119000  | -0.959084000 |

1 -0.000275000 0.107442000 -1.850531000  
E(RB+HF-LYP) = -1335.91679

Zero-point correction= 0.109059  
Thermal correction to Energy= 0.123089  
Thermal correction to Enthalpy= 0.124033  
Thermal correction to Gibbs Free Energy= 0.067010  
Sum of electronic and zero-point Energies= -1335.807733  
Sum of electronic and thermal Energies= -1335.793703  
Sum of electronic and thermal Enthalpies= -1335.792759  
Sum of electronic and thermal Free Energies= -1335.849782

### 17

75 -0.002544000 -0.035838000 -0.164104000  
15 0.001764000 2.333910000 -0.253950000  
15 -2.357661000 -0.040111000 -0.387209000  
15 2.340397000 -0.072313000 -0.456964000  
15 0.058239000 -0.201342000 2.217004000  
7 -0.030368000 -1.995839000 -0.425025000  
7 -0.053846000 -3.107490000 -0.613427000  
1 -1.025335000 2.992010000 -0.982371000  
1 -0.059492000 3.190644000 0.883300000  
1 1.087037000 3.005583000 -0.879610000  
1 -2.959084000 -1.172435000 -0.995751000  
1 -3.286861000 0.067005000 0.688798000  
1 -2.974287000 0.942816000 -1.205563000  
1 2.919391000 -1.182106000 -1.125314000  
1 3.277082000 -0.029468000 0.618101000  
1 2.960986000 0.940503000 -1.234969000  
1 -0.749831000 0.625887000 3.050371000  
1 -0.271544000 -1.414155000 2.888626000  
1 1.257967000 0.023719000 2.955743000  
1 -0.036786000 0.119003000 -1.867601000

E(RB+HF-LYP) = -1561.88040

Zero-point correction= 0.128178  
Thermal correction to Energy= 0.143016  
Thermal correction to Enthalpy= 0.143961  
Thermal correction to Gibbs Free Energy= 0.085489  
Sum of electronic and zero-point Energies= -1561.752224  
Sum of electronic and thermal Energies= -1561.737386  
Sum of electronic and thermal Enthalpies= -1561.736441  
Sum of electronic and thermal Free Energies= -1561.794913

### 18

26 -0.000077000 0.000127000 -0.347672000  
15 -2.253644000 -0.000787000 -0.127258000  
1 -3.118176000 0.000808000 -1.248331000  
1 -2.811671000 -1.076447000 0.590756000  
1 -2.811732000 1.072672000 0.593973000  
6 0.000740000 -1.790633000 -0.583655000  
8 0.001263000 -2.916468000 -0.814259000



|                                              |              |              |              |
|----------------------------------------------|--------------|--------------|--------------|
| 1                                            | -0.000295000 | 0.000447000  | -1.853676000 |
| 15                                           | 2.253651000  | 0.000984000  | -0.127464000 |
| 6                                            | -0.000839000 | 1.790950000  | -0.582901000 |
| 1                                            | 3.118074000  | -0.000718000 | -1.248622000 |
| 1                                            | 2.811740000  | 1.076721000  | 0.590380000  |
| 1                                            | 2.811710000  | -1.072432000 | 0.593833000  |
| 8                                            | -0.001342000 | 2.916835000  | -0.813286000 |
| 17                                           | 0.000204000  | -0.000714000 | 2.050687000  |
| E(RB+HF-LYP) = -1497.25554                   |              |              |              |
| Zero-point correction=                       |              |              | 0.082544     |
| Thermal correction to Energy=                |              |              | 0.095581     |
| Thermal correction to Enthalpy=              |              |              | 0.096525     |
| Thermal correction to Gibbs Free Energy=     |              |              | 0.042189     |
| Sum of electronic and zero-point Energies=   |              |              | -1497.172997 |
| Sum of electronic and thermal Energies=      |              |              | -1497.159960 |
| Sum of electronic and thermal Enthalpies=    |              |              | -1497.159016 |
| Sum of electronic and thermal Free Energies= |              |              | -1497.213300 |

## 19

|                                              |              |              |              |
|----------------------------------------------|--------------|--------------|--------------|
| 26                                           | -0.000013000 | 0.000066000  | -0.170151000 |
| 15                                           | -2.204563000 | -0.004179000 | 0.279812000  |
| 1                                            | -3.255764000 | -0.008245000 | -0.669313000 |
| 1                                            | -2.626194000 | -1.077054000 | 1.088506000  |
| 1                                            | -2.631641000 | 1.069141000  | 1.085087000  |
| 6                                            | 0.003559000  | -1.760256000 | -0.538157000 |
| 8                                            | 0.006284000  | -2.850589000 | -0.909430000 |
| 1                                            | -0.001317000 | 0.000057000  | -1.699678000 |
| 15                                           | 2.203839000  | 0.004154000  | 0.279479000  |
| 6                                            | -0.003569000 | 1.760120000  | -0.538333000 |
| 1                                            | 3.254013000  | 0.003058000  | -0.670945000 |
| 1                                            | 2.627437000  | 1.080144000  | 1.082833000  |
| 1                                            | 2.629509000  | -1.067111000 | 1.087947000  |
| 8                                            | -0.006170000 | 2.850582000  | -0.909305000 |
| 9                                            | 0.001590000  | -0.000053000 | 1.748771000  |
| E(RB+HF-LYP) = -1136.86589                   |              |              |              |
| Zero-point correction=                       |              |              | 0.083259     |
| Thermal correction to Energy=                |              |              | 0.095760     |
| Thermal correction to Enthalpy=              |              |              | 0.096704     |
| Thermal correction to Gibbs Free Energy=     |              |              | 0.044443     |
| Sum of electronic and zero-point Energies=   |              |              | -1136.782626 |
| Sum of electronic and thermal Energies=      |              |              | -1136.770125 |
| Sum of electronic and thermal Enthalpies=    |              |              | -1136.769181 |
| Sum of electronic and thermal Free Energies= |              |              | -1136.821443 |

## 20

|    |              |              |              |
|----|--------------|--------------|--------------|
| 26 | -0.000218000 | -0.560146000 | 0.000287000  |
| 15 | -1.624112000 | -0.763329000 | -1.514330000 |
| 15 | -1.646326000 | -0.664026000 | 1.513047000  |
| 15 | 1.623749000  | -0.764059000 | 1.514605000  |

|    |              |              |              |
|----|--------------|--------------|--------------|
| 15 | 1.645283000  | -0.665773000 | -1.512984000 |
| 7  | 0.000673000  | 1.482472000  | -0.000098000 |
| 1  | -2.053332000 | 0.344902000  | -2.290281000 |
| 1  | -1.561076000 | -1.712096000 | -2.564663000 |
| 1  | -1.811819000 | -1.837591000 | 2.291048000  |
| 1  | -1.812842000 | 0.277634000  | 2.558880000  |
| 6  | -3.313007000 | -0.541773000 | 0.667132000  |
| 6  | -3.230888000 | -1.261849000 | -0.685398000 |
| 1  | 1.560605000  | -1.712944000 | 2.564829000  |
| 1  | 2.053601000  | 0.343898000  | 2.290589000  |
| 1  | 1.809990000  | -1.839925000 | -2.290267000 |
| 1  | 1.811769000  | 0.275104000  | -2.559513000 |
| 6  | 3.230180000  | -1.263217000 | 0.685291000  |
| 6  | 3.312218000  | -0.543714000 | -0.667559000 |
| 6  | -0.034031000 | 2.309666000  | -1.096185000 |
| 6  | -0.020430000 | 3.645193000  | -0.708113000 |
| 6  | 0.023732000  | 3.645362000  | 0.707339000  |
| 6  | 0.036119000  | 2.309928000  | 1.095769000  |
| 1  | -4.117328000 | -0.936612000 | 1.294410000  |
| 1  | -3.495565000 | 0.527908000  | 0.517175000  |
| 1  | -4.093441000 | -1.037464000 | -1.319483000 |
| 1  | -3.190603000 | -2.347038000 | -0.542164000 |
| 1  | 4.092959000  | -1.038814000 | 1.319064000  |
| 1  | 3.189613000  | -2.348453000 | 0.542488000  |
| 1  | 4.116258000  | -0.939110000 | -1.294847000 |
| 1  | 3.495171000  | 0.525969000  | -0.518108000 |
| 1  | -0.069391000 | 1.903182000  | -2.099722000 |
| 1  | -0.040153000 | 4.505784000  | -1.365715000 |
| 1  | 0.044227000  | 4.506112000  | 1.364708000  |
| 1  | 0.071085000  | 1.903674000  | 2.099412000  |
| 1  | -0.001036000 | -2.117399000 | 0.000658000  |

E(RB+HF-LYP) = -1861.08041

|                                              |              |
|----------------------------------------------|--------------|
| Zero-point correction=                       | 0.271544     |
| Thermal correction to Energy=                | 0.290128     |
| Thermal correction to Enthalpy=              | 0.291072     |
| Thermal correction to Gibbs Free Energy=     | 0.224659     |
| Sum of electronic and zero-point Energies=   | -1860.808869 |
| Sum of electronic and thermal Energies=      | -1860.790284 |
| Sum of electronic and thermal Enthalpies=    | -1860.789340 |
| Sum of electronic and thermal Free Energies= | -1860.855753 |

**21**

|    |              |              |              |
|----|--------------|--------------|--------------|
| 26 | -0.000205000 | -0.000014000 | -0.163244000 |
| 15 | -1.626073000 | 1.512721000  | -0.184245000 |
| 15 | -1.611857000 | -1.514148000 | -0.314419000 |
| 15 | 1.625829000  | -1.512725000 | -0.186075000 |
| 15 | 1.611242000  | 1.514219000  | -0.315881000 |
| 6  | -3.271003000 | 0.666858000  | 0.109721000  |
| 1  | -3.338223000 | 0.510780000  | 1.191748000  |
| 1  | -4.112200000 | 1.295651000  | -0.195853000 |
| 6  | -3.263708000 | -0.680055000 | -0.625590000 |
| 1  | -3.340328000 | -0.526733000 | -1.707575000 |

S18

|   |              |              |              |
|---|--------------|--------------|--------------|
| 1 | -4.096929000 | -1.317836000 | -0.317139000 |
| 6 | 3.270364000  | -0.666882000 | 0.109834000  |
| 1 | 3.336356000  | -0.511319000 | 1.192004000  |
| 1 | 4.111958000  | -1.295414000 | -0.195187000 |
| 6 | 3.263658000  | 0.680333000  | -0.624906000 |
| 1 | 3.341862000  | 0.527434000  | -1.706840000 |
| 1 | 4.096317000  | 1.318192000  | -0.315109000 |
| 7 | 0.002691000  | -0.000384000 | 2.959403000  |
| 6 | 0.001441000  | -0.000203000 | 1.786547000  |
| 1 | -0.001367000 | 0.000090000  | -1.718100000 |
| 1 | 1.625503000  | 2.516140000  | -1.317138000 |
| 1 | -1.924804000 | -2.349221000 | 0.788735000  |
| 1 | -1.688663000 | 2.565371000  | 0.760803000  |
| 1 | 1.905465000  | -2.282372000 | -1.344269000 |
| 1 | 1.688173000  | -2.566669000 | 0.757534000  |
| 1 | 1.922923000  | 2.351543000  | 0.785909000  |
| 1 | -1.905241000 | 2.283982000  | -1.341478000 |
| 1 | -1.625940000 | -2.517865000 | -1.313881000 |

E(RB+HF-LYP) = -1744.36783

|                                              |              |
|----------------------------------------------|--------------|
| Zero-point correction=                       | 0.208857     |
| Thermal correction to Energy=                | 0.224841     |
| Thermal correction to Enthalpy=              | 0.225785     |
| Thermal correction to Gibbs Free Energy=     | 0.165753     |
| Sum of electronic and zero-point Energies=   | -1744.158971 |
| Sum of electronic and thermal Energies=      | -1744.142987 |
| Sum of electronic and thermal Enthalpies=    | -1744.142043 |
| Sum of electronic and thermal Free Energies= | -1744.202075 |

## 22

|    |              |              |              |
|----|--------------|--------------|--------------|
| 26 | -0.001284000 | -0.002078000 | -0.263582000 |
| 15 | -1.627237000 | 1.518084000  | -0.357533000 |
| 15 | -1.640666000 | -1.520598000 | -0.244943000 |
| 15 | 1.630400000  | -1.517173000 | -0.361096000 |
| 15 | 1.635776000  | 1.520722000  | -0.244900000 |
| 1  | -1.882145000 | 2.342137000  | 0.767236000  |
| 1  | -1.691667000 | 2.523137000  | -1.354585000 |
| 1  | -1.974418000 | -2.262276000 | -1.407903000 |
| 1  | -1.669241000 | -2.589875000 | 0.682231000  |
| 6  | -3.266924000 | -0.669812000 | 0.130548000  |
| 6  | -3.290161000 | 0.681100000  | -0.598193000 |
| 1  | 1.698711000  | -2.519912000 | -1.360278000 |
| 1  | 1.887131000  | -2.342893000 | 0.761958000  |
| 1  | 1.966309000  | 2.268388000  | -1.404942000 |
| 1  | 1.659642000  | 2.586039000  | 0.686857000  |
| 6  | 3.291109000  | -0.675700000 | -0.600291000 |
| 6  | 3.264422000  | 0.674540000  | 0.129288000  |
| 1  | -4.124650000 | -1.293454000 | -0.137732000 |
| 1  | -3.278244000 | -0.518900000 | 1.214987000  |
| 1  | -4.111391000 | 1.315653000  | -0.252855000 |
| 1  | -3.413598000 | 0.531796000  | -1.676640000 |
| 1  | 4.113742000  | -1.308499000 | -0.255074000 |
| 1  | 3.414689000  | -0.525545000 | -1.678619000 |

|    |              |              |              |
|----|--------------|--------------|--------------|
| 1  | 4.120516000  | 1.300713000  | -0.138290000 |
| 1  | 3.275682000  | 0.522893000  | 1.213632000  |
| 1  | -0.003729000 | -0.002469000 | -1.796620000 |
| 17 | 0.004779000  | -0.002895000 | 2.161690000  |

E(RB+HF-LYP) = -2111.75349

|                                              |              |
|----------------------------------------------|--------------|
| Zero-point correction=                       | 0.201388     |
| Thermal correction to Energy=                | 0.216999     |
| Thermal correction to Enthalpy=              | 0.217943     |
| Thermal correction to Gibbs Free Energy=     | 0.158120     |
| Sum of electronic and zero-point Energies=   | -2111.552106 |
| Sum of electronic and thermal Energies=      | -2111.536495 |
| Sum of electronic and thermal Enthalpies=    | -2111.535551 |
| Sum of electronic and thermal Free Energies= | -2111.595374 |

### 23

|    |              |              |              |
|----|--------------|--------------|--------------|
| 44 | 0.303775000  | 0.000002000  | -0.118365000 |
| 15 | -0.056603000 | 2.322774000  | -0.337557000 |
| 15 | -0.057273000 | -2.322647000 | -0.337720000 |
| 8  | -3.985683000 | 0.000258000  | -0.399202000 |
| 8  | 1.095864000  | -0.000353000 | 2.941779000  |
| 8  | 3.122797000  | -0.000338000 | -1.272833000 |
| 7  | -1.744150000 | 0.000223000  | 0.454720000  |
| 6  | -2.855215000 | 0.000258000  | -0.011180000 |
| 6  | 0.806833000  | -0.000194000 | 1.831813000  |
| 6  | 2.068404000  | -0.000196000 | -0.801021000 |
| 1  | 0.901495000  | 3.177603000  | -0.928671000 |
| 1  | -0.340552000 | 3.081858000  | 0.818133000  |
| 1  | -1.180002000 | 2.660602000  | -1.113173000 |
| 1  | -1.180565000 | -2.660111000 | -1.113647000 |
| 1  | 0.900698000  | -3.177820000 | -0.928547000 |
| 1  | -0.341806000 | -3.081584000 | 0.817919000  |
| 1  | -0.192119000 | 0.000145000  | -1.673455000 |

E(RB+HF-LYP) = -1175.62399

|                                              |              |
|----------------------------------------------|--------------|
| Zero-point correction=                       | 0.094235     |
| Thermal correction to Energy=                | 0.109408     |
| Thermal correction to Enthalpy=              | 0.110352     |
| Thermal correction to Gibbs Free Energy=     | 0.049333     |
| Sum of electronic and zero-point Energies=   | -1175.529752 |
| Sum of electronic and thermal Energies=      | -1175.514579 |
| Sum of electronic and thermal Enthalpies=    | -1175.513635 |
| Sum of electronic and thermal Free Energies= | -1175.574654 |

### 24

|    |              |              |              |
|----|--------------|--------------|--------------|
| 44 | 0.069394000  | 0.000008000  | -0.119439000 |
| 15 | 2.486269000  | -0.000618000 | -0.319388000 |
| 14 | -2.382486000 | 0.000462000  | -0.516737000 |
| 8  | -0.217125000 | 3.054088000  | -0.544838000 |
| 8  | -0.290543000 | 0.000143000  | 2.988733000  |
| 8  | -0.218736000 | -3.053943000 | -0.544753000 |
| 6  | -0.098947000 | 1.928788000  | -0.346580000 |

|   |              |              |              |
|---|--------------|--------------|--------------|
| 6 | -0.129612000 | 0.000034000  | 1.850534000  |
| 6 | -0.099930000 | -1.928696000 | -0.346559000 |
| 1 | 3.094708000  | -1.062219000 | -1.025211000 |
| 1 | 3.359091000  | -0.000964000 | 0.795692000  |
| 1 | 3.095329000  | 1.060750000  | -1.025028000 |
| 1 | -3.174298000 | -0.001255000 | 0.749444000  |
| 1 | -2.831240000 | 1.194525000  | -1.287882000 |
| 1 | -2.831141000 | -1.191559000 | -1.291083000 |
| 1 | 0.077148000  | 0.000109000  | -1.773002000 |

E(RB+HF-LYP) = -1069.01789

|                                              |              |
|----------------------------------------------|--------------|
| Zero-point correction=                       | 0.085794     |
| Thermal correction to Energy=                | 0.099895     |
| Thermal correction to Enthalpy=              | 0.100839     |
| Thermal correction to Gibbs Free Energy=     | 0.043241     |
| Sum of electronic and zero-point Energies=   | -1068.932094 |
| Sum of electronic and thermal Energies=      | -1068.917993 |
| Sum of electronic and thermal Enthalpies=    | -1068.917049 |
| Sum of electronic and thermal Free Energies= | -1068.974647 |

## 25

|    |              |              |              |
|----|--------------|--------------|--------------|
| 44 | -0.000537000 | 0.208450000  | -0.221674000 |
| 15 | -2.316288000 | -0.008772000 | -0.546541000 |
| 15 | 0.000951000  | -0.413008000 | 2.171181000  |
| 15 | 2.315983000  | -0.000124000 | -0.546784000 |
| 8  | -0.005695000 | 3.221611000  | 0.028971000  |
| 17 | 0.004695000  | -2.286478000 | -0.529476000 |
| 1  | -2.682607000 | -0.735608000 | -1.694865000 |
| 1  | -3.148621000 | 1.122407000  | -0.720860000 |
| 1  | -3.109716000 | -0.696618000 | 0.402173000  |
| 1  | -1.055703000 | -1.229894000 | 2.636786000  |
| 1  | 1.062136000  | -1.223654000 | 2.637502000  |
| 1  | -0.002044000 | 0.509726000  | 3.249626000  |
| 1  | 3.111082000  | -0.686831000 | 0.401300000  |
| 1  | 3.144644000  | 1.134097000  | -0.718988000 |
| 1  | 2.685352000  | -0.723888000 | -1.696059000 |
| 6  | -0.003941000 | 2.064337000  | -0.054419000 |
| 1  | -0.001215000 | 0.398234000  | -1.814954000 |

E(RB+HF-LYP) = -1697.58877

|                                              |              |
|----------------------------------------------|--------------|
| Zero-point correction=                       | 0.101872     |
| Thermal correction to Energy=                | 0.115983     |
| Thermal correction to Enthalpy=              | 0.116927     |
| Thermal correction to Gibbs Free Energy=     | 0.059924     |
| Sum of electronic and zero-point Energies=   | -1697.486903 |
| Sum of electronic and thermal Energies=      | -1697.472792 |
| Sum of electronic and thermal Enthalpies=    | -1697.471848 |
| Sum of electronic and thermal Free Energies= | -1697.528851 |

## 26

|    |             |             |              |
|----|-------------|-------------|--------------|
| 44 | 0.016249000 | 0.158203000 | -0.207346000 |
|----|-------------|-------------|--------------|

|    |              |              |              |
|----|--------------|--------------|--------------|
| 15 | -2.284342000 | 0.189939000  | -0.624367000 |
| 15 | 2.290467000  | -0.136771000 | -0.655819000 |
| 8  | 0.267463000  | 2.848292000  | 1.169682000  |
| 6  | 0.174103000  | 1.813402000  | 0.649888000  |
| 1  | -3.110536000 | 1.323857000  | -0.445038000 |
| 1  | -3.121260000 | -0.767881000 | -0.002045000 |
| 1  | -2.600345000 | -0.109674000 | -1.962845000 |
| 1  | 2.517908000  | -0.734602000 | -1.911734000 |
| 1  | 3.181212000  | 0.955256000  | -0.758859000 |
| 1  | 3.122035000  | -0.985132000 | 0.119880000  |
| 1  | 0.071947000  | 0.917026000  | -1.618274000 |
| 15 | -0.108867000 | -1.417599000 | 1.692963000  |
| 1  | 0.829543000  | -2.475638000 | 1.674104000  |
| 1  | -0.020386000 | -1.133371000 | 3.080958000  |
| 1  | -1.264013000 | -2.232038000 | 1.756743000  |
| 9  | -0.218250000 | -1.657666000 | -1.139788000 |

E(RB+HF-LYP) = -1337.19813

|                                              |              |
|----------------------------------------------|--------------|
| Zero-point correction=                       | 0.102451     |
| Thermal correction to Energy=                | 0.116335     |
| Thermal correction to Enthalpy=              | 0.117279     |
| Thermal correction to Gibbs Free Energy=     | 0.060310     |
| Sum of electronic and zero-point Energies=   | -1337.095679 |
| Sum of electronic and thermal Energies=      | -1337.081794 |
| Sum of electronic and thermal Enthalpies=    | -1337.080850 |
| Sum of electronic and thermal Free Energies= | -1337.137820 |

**27**

|    |              |              |              |
|----|--------------|--------------|--------------|
| 44 | 0.080949000  | -0.000363000 | -0.184372000 |
| 15 | 2.451666000  | -0.009140000 | -0.254866000 |
| 15 | -0.095176000 | -2.294744000 | -0.469789000 |
| 15 | -0.243875000 | -0.002146000 | 2.171857000  |
| 15 | -0.075155000 | 2.296407000  | -0.466010000 |
| 14 | -2.346929000 | 0.010996000  | -0.521901000 |
| 1  | 3.134485000  | -1.068321000 | -0.910678000 |
| 1  | 3.287781000  | -0.006382000 | 0.899109000  |
| 1  | 3.140485000  | 1.040247000  | -0.919979000 |
| 1  | -0.809201000 | -2.787561000 | -1.583623000 |
| 1  | 1.067183000  | -3.097259000 | -0.639473000 |
| 1  | -0.711387000 | -3.118640000 | 0.509782000  |
| 1  | -0.973050000 | -1.058847000 | 2.777812000  |
| 1  | 0.812506000  | 0.001650000  | 3.128270000  |
| 1  | -0.981920000 | 1.047838000  | 2.778594000  |
| 1  | -0.683706000 | 3.124952000  | 0.514447000  |
| 1  | 1.093947000  | 3.089131000  | -0.635386000 |
| 1  | -0.785286000 | 2.796695000  | -1.579051000 |
| 1  | -3.177448000 | 0.023820000  | 0.736679000  |
| 1  | -2.893519000 | -1.171686000 | -1.271668000 |
| 1  | -2.880059000 | 1.189774000  | -1.287126000 |
| 1  | 0.092534000  | 0.000968000  | -1.816608000 |

E(RB+HF-LYP) = -1758.45983

|                        |          |
|------------------------|----------|
| Zero-point correction= | 0.144543 |
|------------------------|----------|

|                                              |              |
|----------------------------------------------|--------------|
| Thermal correction to Energy=                | 0.160480     |
| Thermal correction to Enthalpy=              | 0.161424     |
| Thermal correction to Gibbs Free Energy=     | 0.101095     |
| Sum of electronic and zero-point Energies=   | -1758.315290 |
| Sum of electronic and thermal Energies=      | -1758.299353 |
| Sum of electronic and thermal Enthalpies=    | -1758.298408 |
| Sum of electronic and thermal Free Energies= | -1758.358738 |

## 28

|    |              |              |              |
|----|--------------|--------------|--------------|
| 44 | -0.000049000 | 0.000029000  | -0.328301000 |
| 15 | 1.733867000  | -1.552154000 | -0.308552000 |
| 15 | 1.726987000  | 1.561115000  | -0.264164000 |
| 15 | -1.733960000 | 1.552197000  | -0.307864000 |
| 15 | -1.727043000 | -1.561068000 | -0.264002000 |
| 1  | 1.910554000  | -2.338467000 | 0.856112000  |
| 1  | 1.908302000  | -2.580794000 | -1.268096000 |
| 1  | 2.149815000  | 2.276955000  | -1.414337000 |
| 1  | 1.711142000  | 2.649334000  | 0.640664000  |
| 6  | 3.308121000  | 0.693628000  | 0.246331000  |
| 6  | 3.391373000  | -0.677273000 | -0.438589000 |
| 1  | -1.908605000 | 2.581044000  | -1.267147000 |
| 1  | -1.910418000 | 2.338256000  | 0.857008000  |
| 1  | -2.150092000 | -2.276782000 | -1.414171000 |
| 1  | -1.710979000 | -2.649394000 | 0.640694000  |
| 6  | -3.391483000 | 0.677333000  | -0.437739000 |
| 6  | -3.308095000 | -0.693687000 | 0.246935000  |
| 1  | 4.187076000  | 1.307015000  | 0.026364000  |
| 1  | 3.235616000  | 0.573544000  | 1.332275000  |
| 1  | 4.189253000  | -1.290373000 | -0.009393000 |
| 1  | 3.601560000  | -0.559290000 | -1.507577000 |
| 1  | -4.189295000 | 1.290350000  | -0.008295000 |
| 1  | -3.601859000 | 0.559527000  | -1.506708000 |
| 1  | -4.187084000 | -1.307043000 | 0.027022000  |
| 1  | -3.235399000 | -0.573786000 | 1.332887000  |
| 1  | -0.000272000 | 0.000157000  | -1.936825000 |
| 17 | 0.000328000  | -0.000168000 | 2.266581000  |

E(RB+HF-LYP) = -2082.26656

|                                              |              |
|----------------------------------------------|--------------|
| Zero-point correction=                       | 0.201570     |
| Thermal correction to Energy=                | 0.217406     |
| Thermal correction to Enthalpy=              | 0.218350     |
| Thermal correction to Gibbs Free Energy=     | 0.157256     |
| Sum of electronic and zero-point Energies=   | -2082.064995 |
| Sum of electronic and thermal Energies=      | -2082.049158 |
| Sum of electronic and thermal Enthalpies=    | -2082.048214 |
| Sum of electronic and thermal Free Energies= | -2082.109308 |

## 29

|    |              |              |              |
|----|--------------|--------------|--------------|
| 44 | -0.217508000 | 0.014597000  | -0.302040000 |
| 17 | 0.320844000  | -0.112598000 | 2.234031000  |
| 15 | -1.788785000 | -1.624618000 | -0.330015000 |
| 15 | -1.778916000 | 1.650119000  | -0.145175000 |

|   |              |              |              |
|---|--------------|--------------|--------------|
| 7 | 1.477493000  | -1.386518000 | -0.462569000 |
| 1 | 1.344054000  | -2.100272000 | 0.250920000  |
| 1 | 1.492663000  | -1.836982000 | -1.373732000 |
| 7 | 1.470047000  | 1.408791000  | -0.265717000 |
| 1 | 1.316717000  | 2.297512000  | -0.734489000 |
| 1 | 1.564645000  | 1.575208000  | 0.740363000  |
| 6 | 2.747163000  | -0.663478000 | -0.195883000 |
| 1 | 3.618650000  | -1.204194000 | -0.585318000 |
| 1 | 2.837859000  | -0.586047000 | 0.890602000  |
| 6 | 2.675819000  | 0.735182000  | -0.796826000 |
| 1 | 3.596771000  | 1.286768000  | -0.563403000 |
| 1 | 2.574831000  | 0.682702000  | -1.885365000 |
| 1 | -2.925703000 | -1.563355000 | -1.179739000 |
| 1 | -2.481996000 | -2.004797000 | 0.850952000  |
| 1 | -1.394414000 | -2.940359000 | -0.709190000 |
| 1 | -2.941108000 | 1.668249000  | -0.962208000 |
| 1 | -2.430959000 | 1.929665000  | 1.086026000  |
| 1 | -1.383544000 | 2.990497000  | -0.423137000 |
| 1 | -0.327643000 | 0.108665000  | -1.908932000 |

E(RB+HF-LYP) = -1431.63750

|                                              |              |
|----------------------------------------------|--------------|
| Zero-point correction=                       | 0.181447     |
| Thermal correction to Energy=                | 0.195306     |
| Thermal correction to Enthalpy=              | 0.196251     |
| Thermal correction to Gibbs Free Energy=     | 0.140326     |
| Sum of electronic and zero-point Energies=   | -1431.456055 |
| Sum of electronic and thermal Energies=      | -1431.442195 |
| Sum of electronic and thermal Enthalpies=    | -1431.441251 |
| Sum of electronic and thermal Free Energies= | -1431.497175 |

### 30

|    |              |              |              |
|----|--------------|--------------|--------------|
| 44 | -0.000378000 | 0.000395000  | -0.404033000 |
| 17 | 0.003085000  | -0.002729000 | 2.197441000  |
| 15 | 1.893357000  | -1.385130000 | -0.315076000 |
| 15 | 1.893035000  | 1.385990000  | -0.311985000 |
| 15 | -1.894232000 | -1.385334000 | -0.313229000 |
| 15 | -1.893977000 | 1.386039000  | -0.311507000 |
| 1  | -0.001633000 | 0.002175000  | -2.005877000 |
| 6  | 3.055075000  | -0.000024000 | 0.191793000  |
| 1  | 4.057902000  | 0.000633000  | -0.240876000 |
| 1  | 3.116453000  | -0.001289000 | 1.282938000  |
| 6  | -3.055291000 | 0.000091000  | 0.194050000  |
| 1  | -4.058694000 | 0.000465000  | -0.237317000 |
| 1  | -3.115595000 | -0.000544000 | 1.285252000  |
| 1  | 2.546044000  | -1.966346000 | -1.430165000 |
| 1  | 2.143553000  | -2.414724000 | 0.624092000  |
| 1  | 2.545827000  | 1.969669000  | -1.425712000 |
| 1  | 2.142937000  | 2.413657000  | 0.629400000  |
| 1  | -2.144301000 | -2.414792000 | 0.626194000  |
| 1  | -2.547872000 | -1.966533000 | -1.427727000 |
| 1  | -2.144851000 | 2.414693000  | 0.628569000  |
| 1  | -2.547023000 | 1.968073000  | -1.425923000 |

E(RB+HF-LYP) = -2003.59175



|                                              |              |
|----------------------------------------------|--------------|
| Zero-point correction=                       | 0.142534     |
| Thermal correction to Energy=                | 0.156420     |
| Thermal correction to Enthalpy=              | 0.157364     |
| Thermal correction to Gibbs Free Energy=     | 0.101071     |
| Sum of electronic and zero-point Energies=   | -2003.449213 |
| Sum of electronic and thermal Energies=      | -2003.435327 |
| Sum of electronic and thermal Enthalpies=    | -2003.434383 |
| Sum of electronic and thermal Free Energies= | -2003.490675 |

### 31

|    |              |              |              |
|----|--------------|--------------|--------------|
| 42 | 0.000498000  | 0.002166000  | -0.075526000 |
| 15 | 2.441913000  | -0.056212000 | -0.530683000 |
| 15 | -2.442614000 | 0.048282000  | -0.525447000 |
| 7  | 0.003879000  | 0.000777000  | 1.776932000  |
| 8  | 0.006503000  | 0.000537000  | 2.957155000  |
| 6  | 0.047202000  | 2.049920000  | -0.299136000 |
| 8  | 0.069895000  | 3.189189000  | -0.475148000 |
| 1  | 2.975259000  | -1.123719000 | -1.288610000 |
| 1  | 3.381040000  | -0.095252000 | 0.529237000  |
| 1  | 3.034595000  | 0.998760000  | -1.261939000 |
| 1  | -3.004517000 | -0.960414000 | -1.340720000 |
| 1  | -3.381524000 | -0.025319000 | 0.532830000  |
| 1  | -3.007671000 | 1.158172000  | -1.194982000 |
| 1  | -0.002027000 | 0.004200000  | -1.889727000 |
| 6  | -0.050004000 | -2.045244000 | -0.299204000 |
| 8  | -0.078384000 | -3.184970000 | -0.472075000 |

E(RB+HF-LYP) = -1111.09080

|                                              |              |
|----------------------------------------------|--------------|
| Zero-point correction=                       | 0.086272     |
| Thermal correction to Energy=                | 0.100606     |
| Thermal correction to Enthalpy=              | 0.101550     |
| Thermal correction to Gibbs Free Energy=     | 0.043146     |
| Sum of electronic and zero-point Energies=   | -1111.004529 |
| Sum of electronic and thermal Energies=      | -1110.990195 |
| Sum of electronic and thermal Enthalpies=    | -1110.989251 |
| Sum of electronic and thermal Free Energies= | -1111.047655 |

### 32

|    |              |              |              |
|----|--------------|--------------|--------------|
| 42 | -0.498724000 | 0.005414000  | -0.065899000 |
| 1  | -0.020291000 | 0.155595000  | -1.809054000 |
| 15 | 1.446936000  | -1.592197000 | -0.128848000 |
| 15 | 1.428206000  | 1.615615000  | -0.005244000 |
| 6  | -1.785274000 | -1.405858000 | -0.755502000 |
| 6  | -1.817655000 | 1.474505000  | -0.541541000 |
| 7  | -0.969676000 | -0.129585000 | 1.721419000  |
| 8  | -1.284869000 | -0.208546000 | 2.856023000  |
| 6  | 3.070051000  | -0.666554000 | 0.066808000  |
| 1  | 3.248937000  | -0.589286000 | 1.145372000  |
| 1  | 3.896395000  | -1.241328000 | -0.361405000 |
| 1  | 3.873687000  | 1.325173000  | -0.310831000 |
| 6  | 2.987930000  | 0.733056000  | -0.559100000 |

|   |              |              |              |
|---|--------------|--------------|--------------|
| 1 | 2.924461000  | 0.662045000  | -1.649602000 |
| 1 | 1.649553000  | -2.652057000 | 0.788269000  |
| 1 | 1.673772000  | -2.330465000 | -1.311673000 |
| 1 | 1.458649000  | 2.758660000  | -0.834253000 |
| 1 | 1.878928000  | 2.242934000  | 1.185134000  |
| 8 | -2.552373000 | 2.310921000  | -0.845421000 |
| 8 | -2.501181000 | -2.204089000 | -1.182695000 |

E(RB+HF-LYP) = -1188.52808

|                                              |              |
|----------------------------------------------|--------------|
| Zero-point correction=                       | 0.126717     |
| Thermal correction to Energy=                | 0.141336     |
| Thermal correction to Enthalpy=              | 0.142281     |
| Thermal correction to Gibbs Free Energy=     | 0.083652     |
| Sum of electronic and zero-point Energies=   | -1188.401363 |
| Sum of electronic and thermal Energies=      | -1188.386743 |
| Sum of electronic and thermal Enthalpies=    | -1188.385799 |
| Sum of electronic and thermal Free Energies= | -1188.444428 |

### 33

|    |              |              |              |
|----|--------------|--------------|--------------|
| 42 | 0.000027000  | -0.067393000 | -0.075163000 |
| 15 | -2.434675000 | -0.072665000 | -0.501711000 |
| 15 | -0.002304000 | 2.445570000  | -0.276904000 |
| 15 | 2.435172000  | -0.067477000 | -0.500444000 |
| 7  | -0.000673000 | -0.169316000 | 1.765248000  |
| 8  | -0.001493000 | -0.218182000 | 2.949532000  |
| 6  | 0.002587000  | -2.057451000 | -0.372749000 |
| 8  | 0.004222000  | -3.199143000 | -0.570780000 |
| 1  | -3.074351000 | 1.062502000  | -1.065002000 |
| 1  | -3.364575000 | -0.284604000 | 0.547522000  |
| 1  | -2.964902000 | -1.024464000 | -1.403216000 |
| 1  | -0.002955000 | 3.301289000  | 0.854761000  |
| 1  | 1.053543000  | 3.092007000  | -0.967994000 |
| 1  | -1.059040000 | 3.090559000  | -0.968023000 |
| 1  | 3.072979000  | 1.068892000  | -1.063433000 |
| 1  | 3.364775000  | -0.277447000 | 0.549439000  |
| 1  | 2.967889000  | -1.018298000 | -1.401517000 |
| 1  | -0.000034000 | 0.107164000  | -1.890084000 |

E(RB+HF-LYP) = -1340.90499

|                                              |              |
|----------------------------------------------|--------------|
| Zero-point correction=                       | 0.105916     |
| Thermal correction to Energy=                | 0.120810     |
| Thermal correction to Enthalpy=              | 0.121754     |
| Thermal correction to Gibbs Free Energy=     | 0.062754     |
| Sum of electronic and zero-point Energies=   | -1340.799069 |
| Sum of electronic and thermal Energies=      | -1340.784175 |
| Sum of electronic and thermal Enthalpies=    | -1340.783231 |
| Sum of electronic and thermal Free Energies= | -1340.842231 |

### 34

|    |             |              |              |
|----|-------------|--------------|--------------|
| 42 | 0.000016000 | -0.000024000 | 0.165918000  |
| 15 | 1.857726000 | -1.558343000 | -0.199311000 |

|    |              |              |              |
|----|--------------|--------------|--------------|
| 15 | 1.783781000  | 1.599911000  | -0.318512000 |
| 15 | -1.857688000 | 1.558473000  | -0.198650000 |
| 15 | -1.783756000 | -1.599706000 | -0.319156000 |
| 6  | 3.482997000  | -0.636100000 | -0.475113000 |
| 1  | 3.918343000  | -0.487207000 | 0.519871000  |
| 1  | 4.184930000  | -1.243311000 | -1.054517000 |
| 6  | 3.229394000  | 0.719540000  | -1.146831000 |
| 1  | 2.935342000  | 0.578932000  | -2.192363000 |
| 1  | 4.127350000  | 1.344847000  | -1.129304000 |
| 6  | -3.482930000 | 0.636369000  | -0.475122000 |
| 1  | -3.918473000 | 0.487102000  | 0.519719000  |
| 1  | -4.184734000 | 1.243830000  | -1.054420000 |
| 6  | -3.229251000 | -0.719019000 | -1.147324000 |
| 1  | -2.935054000 | -0.578018000 | -2.192763000 |
| 1  | -4.127215000 | -1.344326000 | -1.130156000 |
| 8  | -0.000314000 | -0.000990000 | 3.193258000  |
| 7  | -0.000115000 | -0.000544000 | 1.999207000  |
| 1  | -0.000014000 | 0.000341000  | -1.671723000 |
| 1  | -1.646817000 | -2.701010000 | -1.203024000 |
| 1  | 2.467874000  | 2.303371000  | 0.710395000  |
| 1  | 2.295635000  | -2.519163000 | 0.749500000  |
| 1  | -1.854288000 | 2.429571000  | -1.318209000 |
| 1  | -2.295743000 | 2.518788000  | 0.750606000  |
| 1  | -2.467949000 | -2.303338000 | 0.709566000  |
| 1  | 1.854467000  | -2.428844000 | -1.319335000 |
| 1  | 1.646804000  | 2.701413000  | -1.202128000 |

E(RB+HF-LYP) = -1725.58318

|                                              |              |
|----------------------------------------------|--------------|
| Zero-point correction=                       | 0.205799     |
| Thermal correction to Energy=                | 0.222224     |
| Thermal correction to Enthalpy=              | 0.223168     |
| Thermal correction to Gibbs Free Energy=     | 0.161401     |
| Sum of electronic and zero-point Energies=   | -1725.377380 |
| Sum of electronic and thermal Energies=      | -1725.360955 |
| Sum of electronic and thermal Enthalpies=    | -1725.360011 |
| Sum of electronic and thermal Free Energies= | -1725.421778 |

### 35

|    |              |              |              |
|----|--------------|--------------|--------------|
| 42 | -0.000475000 | 0.000285000  | -0.059849000 |
| 15 | 2.431773000  | 0.037456000  | -0.408317000 |
| 15 | 0.030488000  | -2.423989000 | -0.447155000 |
| 15 | -2.432726000 | -0.021754000 | -0.408694000 |
| 7  | -0.000117000 | -0.020400000 | 1.772451000  |
| 8  | 0.000309000  | -0.039301000 | 2.964022000  |
| 1  | 3.078511000  | -1.011373000 | -1.116592000 |
| 1  | 3.334559000  | 0.068753000  | 0.686709000  |
| 1  | 3.033516000  | 1.096257000  | -1.140658000 |
| 1  | 0.043517000  | -3.347238000 | 0.631326000  |
| 1  | -1.014764000 | -3.049210000 | -1.178906000 |
| 1  | 1.094169000  | -3.018892000 | -1.177919000 |
| 1  | -3.052455000 | -1.087894000 | -1.115506000 |
| 1  | -3.336266000 | -0.012519000 | 0.686127000  |

|    |              |             |              |
|----|--------------|-------------|--------------|
| 1  | -3.060773000 | 1.020295000 | -1.142649000 |
| 1  | -0.000556000 | 0.016281000 | -1.895350000 |
| 15 | -0.028716000 | 2.430442000 | -0.417247000 |
| 1  | -1.096928000 | 3.034949000 | -1.133655000 |
| 1  | -0.028166000 | 3.346609000 | 0.667346000  |
| 1  | 1.011657000  | 3.056901000 | -1.154738000 |

E(RB+HF-LYP) = -1570.71350

|                                              |              |
|----------------------------------------------|--------------|
| Zero-point correction=                       | 0.125557     |
| Thermal correction to Energy=                | 0.140839     |
| Thermal correction to Enthalpy=              | 0.141783     |
| Thermal correction to Gibbs Free Energy=     | 0.082728     |
| Sum of electronic and zero-point Energies=   | -1570.587941 |
| Sum of electronic and thermal Energies=      | -1570.572659 |
| Sum of electronic and thermal Enthalpies=    | -1570.571715 |
| Sum of electronic and thermal Free Energies= | -1570.630771 |

### 36

|    |              |              |              |
|----|--------------|--------------|--------------|
| 42 | -0.000006000 | -0.000301000 | 0.440488000  |
| 1  | -0.000436000 | 0.000407000  | -1.398569000 |
| 15 | 1.848144000  | -1.597400000 | 0.079504000  |
| 15 | 1.807109000  | 1.604931000  | -0.026024000 |
| 15 | -1.807505000 | -1.605048000 | -0.026433000 |
| 15 | -1.848094000 | 1.597190000  | 0.080968000  |
| 7  | 0.000369000  | -0.000772000 | 2.272207000  |
| 8  | 0.000600000  | -0.000924000 | 3.467447000  |
| 6  | 3.452672000  | -0.651286000 | -0.100231000 |
| 1  | 3.730760000  | -0.403502000 | 0.936277000  |
| 6  | 4.678532000  | -1.229676000 | -0.826382000 |
| 1  | 5.227510000  | -1.951074000 | -0.213991000 |
| 1  | 4.355285000  | -1.755117000 | -1.732754000 |
| 6  | 5.536324000  | 0.019898000  | -1.201641000 |
| 1  | 5.872855000  | -0.041442000 | -2.241141000 |
| 1  | 6.436978000  | 0.085380000  | -0.583633000 |
| 6  | 4.619503000  | 1.262883000  | -0.975504000 |
| 1  | 4.894189000  | 1.771720000  | -0.043842000 |
| 1  | 4.698892000  | 1.999214000  | -1.780735000 |
| 6  | 3.204202000  | 0.676374000  | -0.848873000 |
| 1  | 2.815225000  | 0.436358000  | -1.849166000 |
| 1  | 2.242558000  | -2.598236000 | 1.007152000  |
| 1  | 1.885440000  | -2.420211000 | -1.077009000 |
| 1  | 1.681550000  | 2.720985000  | -0.895259000 |
| 1  | 2.518879000  | 2.279500000  | 1.004316000  |
| 6  | -3.452736000 | 0.651411000  | -0.099490000 |
| 1  | -3.730889000 | 0.403004000  | 0.936846000  |
| 6  | -4.678505000 | 1.230544000  | -0.825289000 |
| 1  | -5.227904000 | 1.950749000  | -0.211876000 |
| 1  | -4.355117000 | 1.757638000  | -1.730641000 |
| 6  | -5.535870000 | -0.018660000 | -1.203013000 |
| 1  | -5.869949000 | 0.043355000  | -2.243266000 |
| 1  | -6.437979000 | -0.084311000 | -0.587153000 |

|   |              |              |              |
|---|--------------|--------------|--------------|
| 6 | -4.619811000 | -1.261926000 | -0.975778000 |
| 1 | -4.699278000 | -1.998746000 | -1.780557000 |
| 1 | -4.895044000 | -1.769987000 | -0.043843000 |
| 6 | -3.204400000 | -0.675851000 | -0.848873000 |
| 1 | -2.815378000 | -0.435375000 | -1.849039000 |
| 1 | -2.519407000 | -2.279561000 | 1.003854000  |
| 1 | -1.682492000 | -2.720982000 | -0.895907000 |
| 1 | -2.242360000 | 2.597306000  | 1.009461000  |
| 1 | -1.885304000 | 2.420985000  | -1.074849000 |

E(RB+HF-LYP) = -1959.04110

|                                              |              |
|----------------------------------------------|--------------|
| Zero-point correction=                       | 0.335003     |
| Thermal correction to Energy=                | 0.356637     |
| Thermal correction to Enthalpy=              | 0.357581     |
| Thermal correction to Gibbs Free Energy=     | 0.283218     |
| Sum of electronic and zero-point Energies=   | -1958.706099 |
| Sum of electronic and thermal Energies=      | -1958.684465 |
| Sum of electronic and thermal Enthalpies=    | -1958.683521 |
| Sum of electronic and thermal Free Energies= | -1958.757884 |

### 37

|    |              |              |              |
|----|--------------|--------------|--------------|
| 74 | 0.060892000  | 0.000029000  | -0.098816000 |
| 1  | -0.127259000 | 0.000204000  | -1.901500000 |
| 8  | 0.002098000  | 3.185717000  | -0.505988000 |
| 8  | 0.004063000  | -3.185635000 | -0.506253000 |
| 8  | 3.186891000  | 0.000965000  | -0.708675000 |
| 8  | 0.286794000  | -0.000028000 | 2.926539000  |
| 15 | -2.459795000 | -0.000714000 | -0.313668000 |
| 6  | 0.028025000  | 2.048543000  | -0.330711000 |
| 6  | 0.029294000  | -2.048498000 | -0.330609000 |
| 6  | 2.059945000  | 0.000555000  | -0.470396000 |
| 7  | 0.201667000  | -0.000094000 | 1.750436000  |
| 1  | -3.294716000 | -0.001040000 | 0.828414000  |
| 1  | -3.070904000 | 1.065395000  | -1.008545000 |
| 1  | -3.070252000 | -1.067097000 | -1.008694000 |

E(RB+HF-LYP) = -881.57934

|                                              |             |
|----------------------------------------------|-------------|
| Zero-point correction=                       | 0.067043    |
| Thermal correction to Energy=                | 0.080450    |
| Thermal correction to Enthalpy=              | 0.081394    |
| Thermal correction to Gibbs Free Energy=     | 0.024655    |
| Sum of electronic and zero-point Energies=   | -881.512297 |
| Sum of electronic and thermal Energies=      | -881.498890 |
| Sum of electronic and thermal Enthalpies=    | -881.497946 |
| Sum of electronic and thermal Free Energies= | -881.554685 |

### 38

|    |              |              |              |
|----|--------------|--------------|--------------|
| 74 | 0.000023000  | 0.000066000  | 0.079263000  |
| 15 | -2.442725000 | 0.000009000  | 0.484275000  |
| 15 | 2.442684000  | 0.000219000  | 0.484762000  |
| 7  | 0.000404000  | -0.000375000 | -1.766482000 |

|   |              |              |              |
|---|--------------|--------------|--------------|
| 8 | 0.000562000  | -0.001189000 | -2.952331000 |
| 6 | -0.000271000 | 2.040116000  | 0.273113000  |
| 8 | -0.000503000 | 3.186017000  | 0.421600000  |
| 1 | -3.020386000 | -1.063454000 | 1.215055000  |
| 1 | -3.020294000 | 1.064427000  | 1.213740000  |
| 1 | -3.344523000 | -0.000658000 | -0.606819000 |
| 1 | 3.020189000  | -1.063083000 | 1.215889000  |
| 1 | 3.344482000  | -0.000861000 | -0.606320000 |
| 1 | 3.020377000  | 1.064786000  | 1.213917000  |
| 1 | -0.000513000 | -0.000299000 | 1.901658000  |
| 6 | -0.000019000 | -2.039926000 | 0.273888000  |
| 8 | -0.000250000 | -3.185787000 | 0.422638000  |

E(RB+HF-LYP) = -1111.39355

|                                              |              |
|----------------------------------------------|--------------|
| Zero-point correction=                       | 0.086899     |
| Thermal correction to Energy=                | 0.100995     |
| Thermal correction to Enthalpy=              | 0.101939     |
| Thermal correction to Gibbs Free Energy=     | 0.043700     |
| Sum of electronic and zero-point Energies=   | -1111.306647 |
| Sum of electronic and thermal Energies=      | -1111.292550 |
| Sum of electronic and thermal Enthalpies=    | -1111.291606 |
| Sum of electronic and thermal Free Energies= | -1111.349845 |

### 39

|    |              |              |              |
|----|--------------|--------------|--------------|
| 74 | 0.001076000  | 0.003960000  | -0.071812000 |
| 15 | 0.124894000  | 2.423953000  | -0.398195000 |
| 15 | 2.425262000  | -0.139071000 | -0.369943000 |
| 15 | -0.130607000 | -2.416773000 | -0.394080000 |
| 7  | 0.003006000  | 0.003700000  | 1.754903000  |
| 8  | 0.002768000  | 0.001870000  | 2.953035000  |
| 1  | 1.239938000  | 3.009984000  | -1.058479000 |
| 1  | 0.108601000  | 3.303092000  | 0.715122000  |
| 1  | -0.867586000 | 3.097574000  | -1.160827000 |
| 1  | 3.274785000  | -0.277526000 | 0.757473000  |
| 1  | 2.992809000  | -1.189507000 | -1.141437000 |
| 1  | 3.150555000  | 0.911025000  | -0.998462000 |
| 1  | 0.908835000  | -3.118214000 | -1.064895000 |
| 1  | -0.227228000 | -3.287216000 | 0.721956000  |
| 1  | -1.196545000 | -2.983922000 | -1.144727000 |
| 1  | -0.005756000 | 0.001329000  | -1.912013000 |
| 15 | -2.424760000 | 0.116092000  | -0.366577000 |
| 1  | -3.028179000 | 1.200680000  | -1.061381000 |
| 1  | -3.111310000 | -0.907005000 | -1.076959000 |
| 1  | -3.283602000 | 0.142828000  | 0.762025000  |

E(RB+HF-LYP) = -1571.00724

|                                            |              |
|--------------------------------------------|--------------|
| Zero-point correction=                     | 0.125921     |
| Thermal correction to Energy=              | 0.141088     |
| Thermal correction to Enthalpy=            | 0.142032     |
| Thermal correction to Gibbs Free Energy=   | 0.082668     |
| Sum of electronic and zero-point Energies= | -1570.881318 |

|                                              |              |
|----------------------------------------------|--------------|
| Sum of electronic and thermal Energies=      | -1570.866151 |
| Sum of electronic and thermal Enthalpies=    | -1570.865207 |
| Sum of electronic and thermal Free Energies= | -1570.924571 |

**40**

|    |              |              |              |
|----|--------------|--------------|--------------|
| 74 | -0.124708000 | 0.044119000  | 0.024232000  |
| 15 | 1.840137000  | -1.359029000 | 0.661391000  |
| 15 | -1.236530000 | -2.006019000 | -0.918360000 |
| 15 | -1.829511000 | 1.447512000  | -1.068716000 |
| 7  | -0.935248000 | -0.017675000 | 1.667497000  |
| 8  | -1.517166000 | -0.063230000 | 2.705743000  |
| 6  | 0.953678000  | 1.677494000  | 0.420747000  |
| 8  | 1.617941000  | 2.611913000  | 0.620876000  |
| 1  | 2.393684000  | -2.280250000 | -0.253350000 |
| 1  | 1.629687000  | -2.254491000 | 1.739994000  |
| 1  | 3.040932000  | -0.779201000 | 1.118281000  |
| 1  | -2.091842000 | -2.809976000 | -0.124139000 |
| 1  | -2.105156000 | -1.872116000 | -2.031389000 |
| 1  | -0.451816000 | -3.057406000 | -1.452282000 |
| 1  | -2.685602000 | 0.914571000  | -2.069762000 |
| 1  | -2.834244000 | 2.069249000  | -0.287824000 |
| 1  | -1.415914000 | 2.589125000  | -1.794009000 |
| 1  | 0.513832000  | 0.055942000  | -1.697996000 |
| 8  | 3.244116000  | 0.170777000  | -1.603926000 |
| 1  | 2.288713000  | 0.175428000  | -1.797127000 |
| 1  | 3.400194000  | 1.050441000  | -1.236801000 |

E(RB+HF-LYP) = -1341.20361

|                                              |              |
|----------------------------------------------|--------------|
| Zero-point correction=                       | 0.106518     |
| Thermal correction to Energy=                | 0.121181     |
| Thermal correction to Enthalpy=              | 0.122125     |
| Thermal correction to Gibbs Free Energy=     | 0.063254     |
| Sum of electronic and zero-point Energies=   | -1341.097095 |
| Sum of electronic and thermal Energies=      | -1341.082432 |
| Sum of electronic and thermal Enthalpies=    | -1341.081488 |
| Sum of electronic and thermal Free Energies= | -1341.140359 |

**41**

|    |              |              |              |
|----|--------------|--------------|--------------|
| 74 | 0.000002000  | -0.000001000 | 0.107523000  |
| 15 | 1.854573000  | -1.554395000 | -0.219718000 |
| 15 | 1.792427000  | 1.589829000  | -0.329205000 |
| 15 | -1.854569000 | 1.554393000  | -0.219716000 |
| 15 | -1.792418000 | -1.589829000 | -0.329232000 |
| 6  | 3.496684000  | -0.646304000 | -0.453278000 |
| 1  | 3.913428000  | -0.512068000 | 0.551588000  |
| 1  | 4.201951000  | -1.256160000 | -1.025689000 |
| 6  | 3.268262000  | 0.717842000  | -1.116242000 |
| 1  | 3.012535000  | 0.591465000  | -2.173764000 |
| 1  | 4.163648000  | 1.344162000  | -1.057322000 |
| 6  | -3.496678000 | 0.646303000  | -0.453295000 |
| 1  | -3.913428000 | 0.512057000  | 0.551566000  |
| 1  | -4.201942000 | 1.256163000  | -1.025706000 |

|   |              |              |              |
|---|--------------|--------------|--------------|
| 6 | -3.268249000 | -0.717837000 | -1.116270000 |
| 1 | -3.012517000 | -0.591451000 | -2.173789000 |
| 1 | -4.163635000 | -1.344160000 | -1.057360000 |
| 8 | -0.000071000 | 0.000026000  | 3.136359000  |
| 7 | 0.000002000  | -0.000017000 | 1.935793000  |
| 1 | 0.000015000  | 0.000002000  | -1.735194000 |
| 1 | -1.676405000 | -2.690626000 | -1.216673000 |
| 1 | 2.430864000  | 2.288418000  | 0.730252000  |
| 1 | 2.248615000  | -2.511681000 | 0.750260000  |
| 1 | -1.872343000 | 2.426083000  | -1.338779000 |
| 1 | -2.248619000 | 2.511672000  | 0.750265000  |
| 1 | -2.430859000 | -2.288429000 | 0.730214000  |
| 1 | 1.872353000  | -2.426077000 | -1.338786000 |
| 1 | 1.676421000  | 2.690636000  | -1.216635000 |

E(RB+HF-LYP) = -1725.87872

|                                              |              |
|----------------------------------------------|--------------|
| Zero-point correction=                       | 0.206126     |
| Thermal correction to Energy=                | 0.222452     |
| Thermal correction to Enthalpy=              | 0.223396     |
| Thermal correction to Gibbs Free Energy=     | 0.161451     |
| Sum of electronic and zero-point Energies=   | -1725.672592 |
| Sum of electronic and thermal Energies=      | -1725.656266 |
| Sum of electronic and thermal Enthalpies=    | -1725.655322 |
| Sum of electronic and thermal Free Energies= | -1725.717267 |

## 42

|    |              |              |              |
|----|--------------|--------------|--------------|
| 74 | -0.000007000 | -0.000054000 | 0.259188000  |
| 15 | -1.858561000 | 1.551254000  | -0.092340000 |
| 15 | -1.780609000 | -1.594096000 | -0.238789000 |
| 15 | 1.858721000  | -1.551176000 | -0.092474000 |
| 15 | 1.780699000  | 1.594194000  | -0.237990000 |
| 6  | -3.500519000 | 0.637226000  | -0.304181000 |
| 1  | -3.896426000 | 0.487104000  | 0.706716000  |
| 1  | -4.220253000 | 1.249376000  | -0.856257000 |
| 6  | -3.273909000 | -0.715857000 | -0.989646000 |
| 1  | -3.034835000 | -0.570837000 | -2.048800000 |
| 1  | -4.164788000 | -1.348548000 | -0.928510000 |
| 6  | 3.500595000  | -0.637061000 | -0.304767000 |
| 1  | 3.896980000  | -0.487305000 | 0.705996000  |
| 1  | 4.220057000  | -1.249042000 | -0.857385000 |
| 6  | 3.273754000  | 0.716274000  | -0.989660000 |
| 1  | 3.034336000  | 0.571653000  | -2.048792000 |
| 1  | 4.164647000  | 1.348950000  | -0.928579000 |
| 6  | -0.000426000 | -0.000482000 | 2.083772000  |
| 1  | 0.000056000  | 0.000068000  | -1.637706000 |
| 1  | 1.654387000  | 2.654513000  | -1.172826000 |
| 1  | -2.406114000 | -2.346079000 | 0.787378000  |
| 1  | -2.250312000 | 2.525537000  | 0.857842000  |
| 1  | 1.894798000  | -2.400290000 | -1.229931000 |
| 1  | 2.250727000  | -2.525195000 | 0.857872000  |
| 1  | 2.406394000  | 2.345383000  | 0.788638000  |
| 1  | -1.894692000 | 2.400091000  | -1.229999000 |



|                                              |              |              |              |
|----------------------------------------------|--------------|--------------|--------------|
| 1                                            | -1.654312000 | -2.653752000 | -1.174377000 |
| 1                                            | -0.000836000 | -0.000875000 | 3.179594000  |
| E(RB+HF-LYP) = -1634.56270                   |              |              |              |
| Zero-point correction=                       |              |              | 0.211206     |
| Thermal correction to Energy=                |              |              | 0.227028     |
| Thermal correction to Enthalpy=              |              |              | 0.227972     |
| Thermal correction to Gibbs Free Energy=     |              |              | 0.167632     |
| Sum of electronic and zero-point Energies=   |              |              | -1634.351497 |
| Sum of electronic and thermal Energies=      |              |              | -1634.335676 |
| Sum of electronic and thermal Enthalpies=    |              |              | -1634.334731 |
| Sum of electronic and thermal Free Energies= |              |              | -1634.395071 |

**1<sup>+</sup>**

|    |              |              |              |
|----|--------------|--------------|--------------|
| 25 | -0.000066000 | 0.000071000  | -0.316085000 |
| 6  | 0.000191000  | -0.000154000 | 1.526511000  |
| 8  | 0.000615000  | -0.000541000 | 2.665269000  |
| 6  | 1.375243000  | 1.335891000  | -0.381619000 |
| 8  | 2.189670000  | 2.125931000  | -0.418082000 |
| 6  | -1.375384000 | -1.335743000 | -0.381581000 |
| 8  | -2.189782000 | -2.125815000 | -0.418022000 |
| 6  | -1.336460000 | 1.374797000  | -0.382105000 |
| 8  | -2.127875000 | 2.187830000  | -0.419835000 |
| 6  | 1.336296000  | -1.374659000 | -0.382560000 |
| 8  | 2.127665000  | -2.187725000 | -0.420548000 |

E(RB3LYP) = -670.346342423

|                                              |  |  |             |
|----------------------------------------------|--|--|-------------|
| Zero-point correction=                       |  |  | 0.042168    |
| Thermal correction to Energy=                |  |  | 0.054342    |
| Thermal correction to Enthalpy=              |  |  | 0.055286    |
| Thermal correction to Gibbs Free Energy=     |  |  | 0.002813    |
| Sum of electronic and zero-point Energies=   |  |  | -670.304174 |
| Sum of electronic and thermal Energies=      |  |  | -670.292001 |
| Sum of electronic and thermal Enthalpies=    |  |  | -670.291057 |
| Sum of electronic and thermal Free Energies= |  |  | -670.343529 |

**2a<sup>+</sup>**

|    |              |              |              |
|----|--------------|--------------|--------------|
| 25 | 0.091771000  | 0.000137000  | -0.285371000 |
| 15 | -2.310976000 | -0.002738000 | -0.315505000 |
| 8  | 3.080922000  | 0.003601000  | -0.620832000 |
| 8  | 0.040914000  | -3.031370000 | -0.360364000 |
| 8  | 0.286088000  | 0.000188000  | 2.678274000  |
| 6  | 1.948934000  | 0.002332000  | -0.491175000 |
| 6  | 0.059910000  | -1.892929000 | -0.336507000 |
| 6  | 0.222197000  | 0.000291000  | 1.537762000  |
| 1  | -2.993749000 | -1.087289000 | 0.267453000  |
| 1  | -2.886601000 | -0.003593000 | -1.604079000 |
| 1  | -2.995928000 | 1.080651000  | 0.267062000  |
| 6  | 0.055206000  | 1.893093000  | -0.336409000 |
| 8  | 0.033219000  | 3.031477000  | -0.360280000 |

E(RB3LYP) = -900.185161578

|                        |  |  |          |
|------------------------|--|--|----------|
| Zero-point correction= |  |  | 0.062003 |
|------------------------|--|--|----------|

|                                              |             |
|----------------------------------------------|-------------|
| Thermal correction to Energy=                | 0.074873    |
| Thermal correction to Enthalpy=              | 0.075817    |
| Thermal correction to Gibbs Free Energy=     | 0.021687    |
| Sum of electronic and zero-point Energies=   | -900.123158 |
| Sum of electronic and thermal Energies=      | -900.110289 |
| Sum of electronic and thermal Enthalpies=    | -900.109345 |
| Sum of electronic and thermal Free Energies= | -900.163475 |

**2b<sup>+</sup>**

|    |              |              |              |
|----|--------------|--------------|--------------|
| 25 | 0.001090000  | 0.006267000  | -0.413676000 |
| 15 | -0.004853000 | -0.030875000 | 1.934132000  |
| 1  | 1.063206000  | 0.595283000  | 2.606305000  |
| 1  | -1.099871000 | 0.557860000  | 2.596789000  |
| 1  | 0.013981000  | -1.294836000 | 2.556213000  |
| 6  | 1.388719000  | 1.305737000  | -0.447496000 |
| 8  | 2.219982000  | 2.083855000  | -0.463103000 |
| 6  | -1.387015000 | -1.290335000 | -0.467693000 |
| 8  | -2.219328000 | -2.067119000 | -0.502295000 |
| 6  | 1.299843000  | -1.380082000 | -0.465521000 |
| 8  | 2.078117000  | -2.211034000 | -0.498017000 |
| 6  | -1.296701000 | 1.395252000  | -0.449615000 |
| 8  | -2.073879000 | 2.227387000  | -0.467513000 |

E(RB3LYP) = -900.177024880

|                                              |             |
|----------------------------------------------|-------------|
| Zero-point correction=                       | 0.061644    |
| Thermal correction to Energy=                | 0.074766    |
| Thermal correction to Enthalpy=              | 0.075710    |
| Thermal correction to Gibbs Free Energy=     | 0.020070    |
| Sum of electronic and zero-point Energies=   | -900.115381 |
| Sum of electronic and thermal Energies=      | -900.102259 |
| Sum of electronic and thermal Enthalpies=    | -900.101315 |
| Sum of electronic and thermal Free Energies= | -900.156955 |

**3a<sup>+</sup>**

|    |              |              |              |
|----|--------------|--------------|--------------|
| 25 | 0.000000000  | 0.000031000  | -0.246784000 |
| 8  | 0.001320000  | -0.000462000 | 2.713863000  |
| 8  | -0.000921000 | 3.021947000  | -0.274005000 |
| 6  | 0.000682000  | -0.000170000 | 1.567408000  |
| 6  | -0.000432000 | 1.879205000  | -0.276103000 |
| 15 | 2.351643000  | 0.000342000  | -0.463696000 |
| 1  | 2.832582000  | 0.000389000  | -1.791725000 |
| 1  | 3.088772000  | -1.080573000 | 0.058559000  |
| 1  | 3.088910000  | 1.081051000  | 0.058764000  |
| 6  | 0.000036000  | -1.879114000 | -0.276345000 |
| 8  | -0.000198000 | -3.021859000 | -0.274447000 |
| 15 | -2.351828000 | -0.000168000 | -0.462804000 |
| 1  | -3.089042000 | 1.080728000  | 0.059327000  |
| 1  | -3.088836000 | -1.080935000 | 0.059907000  |
| 1  | -2.832932000 | -0.000577000 | -1.790769000 |

E(RB3LYP) = -1130.01504362

|                                 |          |
|---------------------------------|----------|
| Zero-point correction=          | 0.081286 |
| Thermal correction to Energy=   | 0.095070 |
| Thermal correction to Enthalpy= | 0.096014 |

|                                              |              |
|----------------------------------------------|--------------|
| Thermal correction to Gibbs Free Energy=     | 0.039866     |
| Sum of electronic and zero-point Energies=   | -1129.933758 |
| Sum of electronic and thermal Energies=      | -1129.919974 |
| Sum of electronic and thermal Enthalpies=    | -1129.919029 |
| Sum of electronic and thermal Free Energies= | -1129.975177 |

**3b<sup>+</sup>**

|    |              |              |              |
|----|--------------|--------------|--------------|
| 25 | 0.048303000  | 0.000743000  | -0.363778000 |
| 15 | -2.357972000 | -0.001630000 | -0.323216000 |
| 1  | -2.956324000 | -0.004259000 | -1.602283000 |
| 1  | -3.051370000 | -1.080440000 | 0.261415000  |
| 1  | -3.053271000 | 1.077892000  | 0.257824000  |
| 15 | 0.414270000  | -0.003134000 | 1.939094000  |
| 1  | 1.095137000  | 1.093952000  | 2.504540000  |
| 1  | -0.704184000 | -0.050812000 | 2.798340000  |
| 1  | 1.171575000  | -1.058874000 | 2.485713000  |
| 6  | 0.017366000  | 1.879416000  | -0.371667000 |
| 8  | 0.003223000  | 3.022096000  | -0.362962000 |
| 6  | 0.021334000  | -1.877910000 | -0.374738000 |
| 8  | 0.009400000  | -3.020672000 | -0.368810000 |
| 6  | 1.867333000  | 0.003164000  | -0.693271000 |
| 8  | 2.988650000  | 0.004504000  | -0.919630000 |

E(RB3LYP) = -1130.00983427

|                                              |              |
|----------------------------------------------|--------------|
| Zero-point correction=                       | 0.081271     |
| Thermal correction to Energy=                | 0.095172     |
| Thermal correction to Enthalpy=              | 0.096116     |
| Thermal correction to Gibbs Free Energy=     | 0.038916     |
| Sum of electronic and zero-point Energies=   | -1129.928564 |
| Sum of electronic and thermal Energies=      | -1129.914662 |
| Sum of electronic and thermal Enthalpies=    | -1129.913718 |
| Sum of electronic and thermal Free Energies= | -1129.970918 |

**3c<sup>+</sup>**

|    |              |              |              |
|----|--------------|--------------|--------------|
| 25 | -0.000096000 | 0.108309000  | -0.254646000 |
| 8  | 0.000184000  | 0.299354000  | 2.702237000  |
| 8  | -2.129470000 | 2.202360000  | -0.530619000 |
| 6  | 0.000051000  | 0.244025000  | 1.557621000  |
| 6  | -1.320780000 | 1.401284000  | -0.425618000 |
| 15 | -1.709870000 | -1.553902000 | -0.297929000 |
| 1  | -2.159089000 | -1.928841000 | -1.583636000 |
| 1  | -2.947481000 | -1.249880000 | 0.302302000  |
| 1  | -1.484362000 | -2.832712000 | 0.251821000  |
| 6  | 1.320204000  | 1.401635000  | -0.425896000 |
| 8  | 2.128648000  | 2.202926000  | -0.531148000 |
| 15 | 1.710404000  | -1.553218000 | -0.297820000 |
| 1  | 1.485889000  | -2.831916000 | 0.252589000  |
| 1  | 2.947788000  | -1.247938000 | 0.302244000  |
| 1  | 2.159918000  | -1.928422000 | -1.583342000 |

E(RB3LYP) = -1130.01548731

|                               |          |
|-------------------------------|----------|
| Zero-point correction=        | 0.081258 |
| Thermal correction to Energy= | 0.095042 |

|                                              |              |
|----------------------------------------------|--------------|
| Thermal correction to Enthalpy=              | 0.095986     |
| Thermal correction to Gibbs Free Energy=     | 0.039854     |
| Sum of electronic and zero-point Energies=   | -1129.934230 |
| Sum of electronic and thermal Energies=      | -1129.920446 |
| Sum of electronic and thermal Enthalpies=    | -1129.919501 |
| Sum of electronic and thermal Free Energies= | -1129.975634 |

**4a<sup>+</sup>**

|    |              |              |              |
|----|--------------|--------------|--------------|
| 25 | -0.000074000 | 0.007985000  | -0.314396000 |
| 15 | -2.339623000 | 0.005699000  | -0.610100000 |
| 1  | -2.751555000 | -0.039298000 | -1.961603000 |
| 1  | -3.122514000 | -1.054195000 | -0.106180000 |
| 1  | -3.122652000 | 1.096511000  | -0.177872000 |
| 15 | 2.339458000  | 0.009278000  | -0.610441000 |
| 1  | 3.120096000  | 1.104596000  | -0.185354000 |
| 1  | 3.124503000  | -1.045555000 | -0.099265000 |
| 1  | 2.751760000  | -0.043954000 | -1.961525000 |
| 15 | 0.000315000  | -0.032864000 | 2.009504000  |
| 1  | -1.067824000 | -0.675349000 | 2.674018000  |
| 1  | 1.069674000  | -0.673679000 | 2.673669000  |
| 1  | -0.000536000 | 1.182586000  | 2.726712000  |
| 6  | 0.001695000  | -1.857080000 | -0.308578000 |
| 8  | 0.002463000  | -3.004261000 | -0.279206000 |
| 6  | -0.001829000 | 1.873479000  | -0.280406000 |
| 8  | -0.002533000 | 3.019089000  | -0.223702000 |

E(RB3LYP) = -1359.8332224

|                                              |              |
|----------------------------------------------|--------------|
| Zero-point correction=                       | 0.100485     |
| Thermal correction to Energy=                | 0.115299     |
| Thermal correction to Enthalpy=              | 0.116243     |
| Thermal correction to Gibbs Free Energy=     | 0.057261     |
| Sum of electronic and zero-point Energies=   | -1359.732738 |
| Sum of electronic and thermal Energies=      | -1359.717924 |
| Sum of electronic and thermal Enthalpies=    | -1359.716980 |
| Sum of electronic and thermal Free Energies= | -1359.775961 |

**4b<sup>+</sup>**

|    |              |              |              |
|----|--------------|--------------|--------------|
| 25 | -0.000082000 | 0.067852000  | -0.224622000 |
| 8  | 0.000008000  | 0.159880000  | 2.730494000  |
| 8  | -0.000508000 | 3.049297000  | -0.415693000 |
| 6  | -0.000007000 | 0.136671000  | 1.580264000  |
| 6  | -0.000337000 | 1.903277000  | -0.349716000 |
| 15 | 2.343623000  | 0.107580000  | -0.417724000 |
| 1  | 3.133256000  | -0.957147000 | 0.067923000  |
| 1  | 3.041232000  | 1.188976000  | 0.157569000  |
| 1  | 2.860723000  | 0.182649000  | -1.731400000 |
| 15 | -2.343648000 | 0.106775000  | -0.417656000 |
| 1  | -3.041977000 | 1.187726000  | 0.157603000  |
| 1  | -3.133174000 | -0.958391000 | 0.067204000  |
| 1  | -2.860107000 | 0.182096000  | -1.731585000 |
| 15 | 0.000426000  | -2.311704000 | -0.258037000 |
| 1  | -1.071364000 | -3.019251000 | 0.327054000  |

|                                              |             |              |              |
|----------------------------------------------|-------------|--------------|--------------|
| 1                                            | 1.072815000 | -3.018344000 | 0.327067000  |
| 1                                            | 0.000718000 | -2.937482000 | -1.526305000 |
| E(RB3LYP) = -1359.83925969                   |             |              |              |
| Zero-point correction=                       |             | 0.100451     |              |
| Thermal correction to Energy=                |             | 0.115144     |              |
| Thermal correction to Enthalpy=              |             | 0.116089     |              |
| Thermal correction to Gibbs Free Energy=     |             | 0.058075     |              |
| Sum of electronic and zero-point Energies=   |             | -1359.738809 |              |
| Sum of electronic and thermal Energies=      |             | -1359.724115 |              |
| Sum of electronic and thermal Enthalpies=    |             | -1359.723171 |              |
| Sum of electronic and thermal Free Energies= |             | -1359.781185 |              |

**4c<sup>+</sup>**

|    |              |              |              |
|----|--------------|--------------|--------------|
| 25 | -0.000018000 | -0.059373000 | -0.320475000 |
| 15 | -1.714143000 | 1.604934000  | -0.271956000 |
| 1  | -2.177548000 | 2.031724000  | -1.537162000 |
| 1  | -2.956331000 | 1.285790000  | 0.314984000  |
| 1  | -1.509223000 | 2.871746000  | 0.317604000  |
| 15 | 1.713866000  | 1.605208000  | -0.272150000 |
| 1  | 1.508804000  | 2.872047000  | 0.317306000  |
| 1  | 2.956123000  | 1.286293000  | 0.314765000  |
| 1  | 2.177150000  | 2.031942000  | -1.537417000 |
| 15 | 0.000173000  | -0.491696000 | 1.955629000  |
| 1  | 0.000316000  | -1.838457000 | 2.375667000  |
| 1  | 1.070999000  | -0.020042000 | 2.747149000  |
| 1  | -1.070605000 | -0.020225000 | 2.747326000  |
| 6  | 1.307002000  | -1.324433000 | -0.586077000 |
| 8  | 2.117280000  | -2.118552000 | -0.761815000 |
| 6  | -1.306893000 | -1.324657000 | -0.585761000 |
| 8  | -2.117069000 | -2.118778000 | -0.761956000 |

E(RB3LYP) = -1359.83439477

|                                              |  |              |
|----------------------------------------------|--|--------------|
| Zero-point correction=                       |  | 0.100414     |
| Thermal correction to Energy=                |  | 0.115230     |
| Thermal correction to Enthalpy=              |  | 0.116174     |
| Thermal correction to Gibbs Free Energy=     |  | 0.057415     |
| Sum of electronic and zero-point Energies=   |  | -1359.733981 |
| Sum of electronic and thermal Energies=      |  | -1359.719165 |
| Sum of electronic and thermal Enthalpies=    |  | -1359.718220 |
| Sum of electronic and thermal Free Energies= |  | -1359.776980 |

**5a<sup>+</sup>**

|    |              |              |              |
|----|--------------|--------------|--------------|
| 25 | 0.000070000  | 0.000097000  | -0.204556000 |
| 6  | 0.000071000  | -0.000458000 | 1.592826000  |
| 8  | 0.000178000  | -0.000898000 | 2.748385000  |
| 15 | -1.586744000 | -1.715634000 | -0.356834000 |
| 1  | -1.979120000 | -2.141070000 | -1.649151000 |
| 1  | -1.307175000 | -2.986533000 | 0.193902000  |
| 1  | -2.876235000 | -1.535746000 | 0.192456000  |
| 15 | -1.715864000 | 1.586770000  | -0.355915000 |
| 1  | -2.986396000 | 1.306691000  | 0.195444000  |
| 1  | -1.536362000 | 2.876481000  | 0.192971000  |
| 1  | -2.142280000 | 1.978565000  | -1.648099000 |

|    |             |              |              |
|----|-------------|--------------|--------------|
| 15 | 1.586717000 | 1.715908000  | -0.356411000 |
| 15 | 1.715724000 | -1.586645000 | -0.356409000 |
| 1  | 1.977179000 | 2.142434000  | -1.648969000 |
| 1  | 1.307782000 | 2.986382000  | 0.195666000  |
| 1  | 2.877089000 | 1.535773000  | 0.190728000  |
| 1  | 2.986255000 | -1.306982000 | 0.195164000  |
| 1  | 1.535940000 | -2.876523000 | 0.191981000  |
| 1  | 2.142216000 | -1.977967000 | -1.648709000 |

E(RB3LYP) = -1589.66

|                                              |              |
|----------------------------------------------|--------------|
| Zero-point correction=                       | 0.119549     |
| Thermal correction to Energy=                | 0.135132     |
| Thermal correction to Enthalpy=              | 0.136076     |
| Thermal correction to Gibbs Free Energy=     | 0.076341     |
| Sum of electronic and zero-point Energies=   | -1589.536527 |
| Sum of electronic and thermal Energies=      | -1589.520943 |
| Sum of electronic and thermal Enthalpies=    | -1589.519999 |
| Sum of electronic and thermal Free Energies= | -1589.579734 |

### 5b<sup>+</sup>

|    |              |              |              |
|----|--------------|--------------|--------------|
| 25 | -0.001200000 | -0.037481000 | -0.280777000 |
| 15 | -2.336153000 | -0.045660000 | -0.510769000 |
| 1  | -2.821506000 | -0.117195000 | -1.837931000 |
| 1  | -3.074717000 | -1.119135000 | 0.032937000  |
| 1  | -3.151421000 | 1.018153000  | -0.058663000 |
| 15 | 0.021475000  | 2.346237000  | -0.225756000 |
| 15 | 2.331658000  | -0.087867000 | -0.516965000 |
| 1  | -1.045743000 | 3.064953000  | 0.359614000  |
| 1  | 1.090116000  | 3.041052000  | 0.385347000  |
| 1  | 0.043670000  | 3.017486000  | -1.471557000 |
| 1  | 3.168874000  | 0.955814000  | -0.058213000 |
| 1  | 3.052902000  | -1.180465000 | 0.011661000  |
| 1  | 2.809213000  | -0.154558000 | -1.847281000 |
| 15 | 0.003028000  | -0.303044000 | 2.012105000  |
| 1  | -1.097531000 | -0.932820000 | 2.638476000  |
| 1  | 1.025464000  | -1.073960000 | 2.612039000  |
| 1  | 0.088007000  | 0.821661000  | 2.866627000  |
| 6  | -0.019026000 | -1.848817000 | -0.493872000 |
| 8  | -0.030410000 | -2.994506000 | -0.628702000 |

E(RB3LYP) = -1589.65173062

|                                              |              |
|----------------------------------------------|--------------|
| Zero-point correction=                       | 0.119507     |
| Thermal correction to Energy=                | 0.135199     |
| Thermal correction to Enthalpy=              | 0.136143     |
| Thermal correction to Gibbs Free Energy=     | 0.075803     |
| Sum of electronic and zero-point Energies=   | -1589.532224 |
| Sum of electronic and thermal Energies=      | -1589.516532 |
| Sum of electronic and thermal Enthalpies=    | -1589.515587 |
| Sum of electronic and thermal Free Energies= | -1589.575927 |

### 6<sup>+</sup>

|    |              |             |              |
|----|--------------|-------------|--------------|
| 25 | -0.001534000 | 0.006834000 | -0.254656000 |
| 15 | 1.620266000  | 1.675135000 | -0.429886000 |

|    |              |              |              |
|----|--------------|--------------|--------------|
| 1  | 1.377454000  | 2.992276000  | 0.030734000  |
| 1  | 2.897374000  | 1.506638000  | 0.158623000  |
| 1  | 2.066938000  | 2.022125000  | -1.729876000 |
| 15 | 1.666335000  | -1.611310000 | -0.451713000 |
| 1  | 2.023620000  | -2.010995000 | -1.764365000 |
| 1  | 2.980179000  | -1.384668000 | 0.026423000  |
| 1  | 1.496796000  | -2.909516000 | 0.088615000  |
| 15 | -1.617781000 | -1.663864000 | -0.446365000 |
| 15 | -1.674823000 | 1.624544000  | -0.425619000 |
| 1  | -1.953524000 | -2.091742000 | -1.755766000 |
| 1  | -1.409439000 | -2.948630000 | 0.112199000  |
| 1  | -2.941280000 | -1.473525000 | 0.020824000  |
| 1  | -2.952067000 | 1.408162000  | 0.146623000  |
| 1  | -1.476304000 | 2.940706000  | 0.058287000  |
| 1  | -2.118628000 | 1.978358000  | -1.724689000 |
| 15 | 0.006886000  | -0.028397000 | 2.047010000  |
| 1  | 1.100145000  | 0.506869000  | 2.773522000  |
| 1  | -1.012596000 | 0.618487000  | 2.789740000  |
| 1  | -0.053559000 | -1.267004000 | 2.734103000  |

E(RB3LYP) = -1819.46180266

|                                              |              |
|----------------------------------------------|--------------|
| Zero-point correction=                       | 0.138415     |
| Thermal correction to Energy=                | 0.154943     |
| Thermal correction to Enthalpy=              | 0.155888     |
| Thermal correction to Gibbs Free Energy=     | 0.092918     |
| Sum of electronic and zero-point Energies=   | -1819.323387 |
| Sum of electronic and thermal Energies=      | -1819.306859 |
| Sum of electronic and thermal Enthalpies=    | -1819.305915 |
| Sum of electronic and thermal Free Energies= | -1819.368885 |

7<sup>+</sup>

E(RB3LYP) = -1246.78222758

|    |              |              |              |
|----|--------------|--------------|--------------|
| 25 | -0.778024000 | -0.000021000 | -0.274841000 |
| 15 | 0.912024000  | 1.638071000  | -0.446315000 |
| 15 | 0.912056000  | -1.638032000 | -0.446562000 |
| 8  | -2.858918000 | 2.152829000  | -0.393953000 |
| 8  | -0.742127000 | -0.000322000 | 2.680117000  |
| 8  | -2.859280000 | -2.152502000 | -0.393957000 |
| 6  | -2.064719000 | 1.330140000  | -0.349276000 |
| 6  | -0.778799000 | -0.000157000 | 1.532111000  |
| 6  | -2.064887000 | -1.330002000 | -0.349228000 |
| 6  | 2.590115000  | 1.303698000  | 0.274448000  |
| 1  | 3.229482000  | 2.157761000  | 0.033681000  |
| 1  | 2.471143000  | 1.288891000  | 1.363938000  |
| 6  | 3.246694000  | 0.000023000  | -0.216097000 |
| 1  | 3.322743000  | 0.000115000  | -1.310751000 |
| 1  | 4.279186000  | 0.000005000  | 0.149363000  |
| 6  | 2.590157000  | -1.303758000 | 0.274224000  |
| 1  | 2.471218000  | -1.289160000 | 1.363720000  |
| 1  | 3.229538000  | -2.157759000 | 0.033274000  |
| 1  | 1.212383000  | -1.965927000 | -1.789659000 |
| 1  | 0.616356000  | -2.929007000 | 0.037234000  |
| 1  | 0.616209000  | 2.928858000  | 0.037912000  |

1 1.212384000 1.966457000 -1.789282000

|                                              |              |
|----------------------------------------------|--------------|
| Zero-point correction=                       | 0.151029     |
| Thermal correction to Energy=                | 0.166208     |
| Thermal correction to Enthalpy=              | 0.167152     |
| Thermal correction to Gibbs Free Energy=     | 0.108107     |
| Sum of electronic and zero-point Energies=   | -1246.631198 |
| Sum of electronic and thermal Energies=      | -1246.616020 |
| Sum of electronic and thermal Enthalpies=    | -1246.615076 |
| Sum of electronic and thermal Free Energies= | -1246.674120 |

**8<sup>+</sup>**

|    |              |              |              |
|----|--------------|--------------|--------------|
| 25 | -0.000014000 | -0.000020000 | -0.188687000 |
| 15 | -1.736835000 | 1.546678000  | -0.277913000 |
| 15 | -1.717094000 | -1.541009000 | -0.327247000 |
| 15 | 1.717056000  | 1.540987000  | -0.327256000 |
| 15 | 1.736866000  | -1.546663000 | -0.277945000 |
| 6  | 0.000009000  | -0.000009000 | 1.593959000  |
| 8  | 0.000055000  | -0.000023000 | 2.753346000  |
| 1  | -1.941390000 | 2.335176000  | 0.876305000  |
| 1  | -1.823409000 | 2.580594000  | -1.239774000 |
| 6  | -3.385522000 | 0.678713000  | -0.499499000 |
| 6  | -3.332297000 | -0.719824000 | 0.134171000  |
| 1  | -2.013760000 | -2.078914000 | -1.605180000 |
| 1  | -1.751206000 | -2.746192000 | 0.408248000  |
| 1  | 1.751116000  | 2.746217000  | 0.408166000  |
| 1  | 2.013713000  | 2.078831000  | -1.605216000 |
| 6  | 3.332280000  | 0.719869000  | 0.134185000  |
| 6  | 3.385539000  | -0.678660000 | -0.499512000 |
| 1  | 1.823483000  | -2.580593000 | -1.239788000 |
| 1  | 1.941441000  | -2.335127000 | 0.876296000  |
| 1  | -3.557653000 | 0.602940000  | -1.578897000 |
| 1  | -4.198612000 | 1.277528000  | -0.081592000 |
| 1  | -3.349013000 | -0.652545000 | 1.227345000  |
| 1  | -4.185701000 | -1.329659000 | -0.173392000 |
| 1  | 3.349000000  | 0.652582000  | 1.227358000  |
| 1  | 4.185656000  | 1.329748000  | -0.173371000 |
| 1  | 3.557683000  | -0.602855000 | -1.578906000 |
| 1  | 4.198628000  | -1.277480000 | -0.081613000 |

E(RB3LYP) = -1744.53991365

|                                              |             |
|----------------------------------------------|-------------|
| Zero-point correction=                       | 0.20079     |
| Thermal correction to Energy=                | 0.21696     |
| Thermal correction to Enthalpy=              | 0.21790     |
| Thermal correction to Gibbs Free Energy=     | 0.15735     |
| Sum of electronic and zero-point Energies=   | -1744.33913 |
| Sum of electronic and thermal Energies=      | -1744.32296 |
| Sum of electronic and thermal Enthalpies=    | -1744.32201 |
| Sum of electronic and thermal Free Energies= | -1744.38256 |

**9<sup>+</sup>**

|    |              |             |              |
|----|--------------|-------------|--------------|
| 25 | -0.000001000 | 0.000004000 | -0.166871000 |
|----|--------------|-------------|--------------|



|    |              |              |              |
|----|--------------|--------------|--------------|
| 15 | -1.750624000 | 1.549220000  | -0.235459000 |
| 15 | -1.732217000 | -1.545001000 | -0.330481000 |
| 15 | 1.732208000  | 1.545017000  | -0.330435000 |
| 15 | 1.750630000  | -1.549203000 | -0.235511000 |
| 7  | 0.000001000  | -0.000051000 | 1.695357000  |
| 7  | 0.000014000  | -0.000102000 | 2.816646000  |
| 1  | -1.997046000 | 2.241570000  | 0.973210000  |
| 1  | -1.827904000 | 2.653671000  | -1.115303000 |
| 6  | -3.385376000 | 0.686489000  | -0.555968000 |
| 6  | -3.363010000 | -0.717135000 | 0.067923000  |
| 1  | -1.985382000 | -2.086214000 | -1.615606000 |
| 1  | -1.806681000 | -2.749046000 | 0.406175000  |
| 1  | 1.806679000  | 2.749075000  | 0.406198000  |
| 1  | 1.985364000  | 2.086207000  | -1.615572000 |
| 6  | 3.363004000  | 0.717149000  | 0.067948000  |
| 6  | 3.385376000  | -0.686452000 | -0.555996000 |
| 1  | 1.827929000  | -2.653654000 | -1.115353000 |
| 1  | 1.997053000  | -2.241546000 | 0.973162000  |
| 1  | -3.499640000 | 0.620644000  | -1.643822000 |
| 1  | -4.220432000 | 1.280375000  | -0.175934000 |
| 1  | -3.425524000 | -0.656289000 | 1.160050000  |
| 1  | -4.206056000 | -1.321045000 | -0.277446000 |
| 1  | 3.425517000  | 0.656262000  | 1.160073000  |
| 1  | 4.206048000  | 1.321075000  | -0.277398000 |
| 1  | 3.499637000  | -0.620565000 | -1.643848000 |
| 1  | 4.220436000  | -1.280348000 | -0.175985000 |

E(RB3LYP) = -1740.71676597

|                                              |              |
|----------------------------------------------|--------------|
| Zero-point correction=                       | 0.200297     |
| Thermal correction to Energy=                | 0.216799     |
| Thermal correction to Enthalpy=              | 0.217743     |
| Thermal correction to Gibbs Free Energy=     | 0.156573     |
| Sum of electronic and zero-point Energies=   | -1740.516469 |
| Sum of electronic and thermal Energies=      | -1740.499967 |
| Sum of electronic and thermal Enthalpies=    | -1740.499023 |
| Sum of electronic and thermal Free Energies= | -1740.560193 |

**10<sup>+</sup>**

|    |              |              |              |
|----|--------------|--------------|--------------|
| 25 | -0.000001000 | 0.000004000  | -0.166871000 |
| 15 | -1.750624000 | 1.549220000  | -0.235459000 |
| 15 | -1.732217000 | -1.545001000 | -0.330481000 |
| 15 | 1.732208000  | 1.545017000  | -0.330435000 |
| 15 | 1.750630000  | -1.549203000 | -0.235511000 |
| 7  | 0.000001000  | -0.000051000 | 1.695357000  |
| 7  | 0.000014000  | -0.000102000 | 2.816646000  |
| 1  | -1.997046000 | 2.241570000  | 0.973210000  |
| 1  | -1.827904000 | 2.653671000  | -1.115303000 |
| 6  | -3.385376000 | 0.686489000  | -0.555968000 |
| 6  | -3.363010000 | -0.717135000 | 0.067923000  |
| 1  | -1.985382000 | -2.086214000 | -1.615606000 |
| 1  | -1.806681000 | -2.749046000 | 0.406175000  |
| 1  | 1.806679000  | 2.749075000  | 0.406198000  |

|   |              |              |              |
|---|--------------|--------------|--------------|
| 1 | 1.985364000  | 2.086207000  | -1.615572000 |
| 6 | 3.363004000  | 0.717149000  | 0.067948000  |
| 6 | 3.385376000  | -0.686452000 | -0.555996000 |
| 1 | 1.827929000  | -2.653654000 | -1.115353000 |
| 1 | 1.997053000  | -2.241546000 | 0.973162000  |
| 1 | -3.499640000 | 0.620644000  | -1.643822000 |
| 1 | -4.220432000 | 1.280375000  | -0.175934000 |
| 1 | -3.425524000 | -0.656289000 | 1.160050000  |
| 1 | -4.206056000 | -1.321045000 | -0.277446000 |
| 1 | 3.425517000  | 0.656262000  | 1.160073000  |
| 1 | 4.206048000  | 1.321075000  | -0.277398000 |
| 1 | 3.499637000  | -0.620565000 | -1.643848000 |
| 1 | 4.220436000  | -1.280348000 | -0.175985000 |

E(RB3LYP) = -1740.71676597

|                                              |              |
|----------------------------------------------|--------------|
| Zero-point correction=                       | 0.118742     |
| Thermal correction to Energy=                | 0.134936     |
| Thermal correction to Enthalpy=              | 0.135880     |
| Thermal correction to Gibbs Free Energy=     | 0.073668     |
| Sum of electronic and zero-point Energies=   | -1585.714987 |
| Sum of electronic and thermal Energies=      | -1585.698793 |
| Sum of electronic and thermal Enthalpies=    | -1585.697849 |
| Sum of electronic and thermal Free Energies= | -1585.760061 |

**11<sup>+</sup>**

|    |              |              |              |
|----|--------------|--------------|--------------|
| 75 | -0.000590000 | 0.000111000  | -0.227015000 |
| 6  | -0.001019000 | 0.000094000  | 1.683224000  |
| 8  | -0.001283000 | 0.000014000  | 2.829339000  |
| 6  | -1.669175000 | -1.166017000 | -0.270013000 |
| 8  | -2.600939000 | -1.819207000 | -0.289075000 |
| 6  | -1.164961000 | 1.669927000  | -0.269956000 |
| 8  | -1.814350000 | 2.604340000  | -0.289150000 |
| 6  | 1.165551000  | -1.668435000 | -0.269426000 |
| 8  | 1.818809000  | -2.600160000 | -0.288288000 |
| 6  | 1.669199000  | 1.164491000  | -0.269305000 |
| 8  | 2.603597000  | 1.813924000  | -0.287952000 |

E(RB3LYP) = -645.595884511

|                                              |             |
|----------------------------------------------|-------------|
| Zero-point correction=                       | 0.042442    |
| Thermal correction to Energy=                | 0.054401    |
| Thermal correction to Enthalpy=              | 0.055345    |
| Thermal correction to Gibbs Free Energy=     | 0.002306    |
| Sum of electronic and zero-point Energies=   | -645.553442 |
| Sum of electronic and thermal Energies=      | -645.541484 |
| Sum of electronic and thermal Enthalpies=    | -645.540540 |
| Sum of electronic and thermal Free Energies= | -645.593579 |

**12<sup>+</sup>**

|    |             |             |              |
|----|-------------|-------------|--------------|
| 75 | 0.000011000 | 0.000018000 | -0.195672000 |
|----|-------------|-------------|--------------|

|    |              |              |              |
|----|--------------|--------------|--------------|
| 15 | 2.449720000  | -0.001781000 | -0.331014000 |
| 15 | -2.449721000 | 0.001984000  | -0.330933000 |
| 6  | 0.000070000  | -0.000238000 | 1.688441000  |
| 8  | 0.000126000  | -0.000589000 | 2.844188000  |
| 6  | 0.001670000  | 2.006807000  | -0.215141000 |
| 8  | 0.002604000  | 3.152626000  | -0.211458000 |
| 6  | -0.001741000 | -2.006740000 | -0.215473000 |
| 8  | -0.002832000 | -3.152561000 | -0.211993000 |
| 1  | 3.008586000  | -0.001447000 | -1.627915000 |
| 1  | 3.148412000  | 1.080739000  | 0.237403000  |
| 1  | 3.147033000  | -1.085803000 | 0.236225000  |
| 1  | -3.008660000 | 0.001348000  | -1.627801000 |
| 1  | -3.146841000 | 1.086259000  | 0.236059000  |
| 1  | -3.148546000 | -1.080283000 | 0.237799000  |

E(RB3LYP) = -1105.26347078

|                                              |              |
|----------------------------------------------|--------------|
| Zero-point correction=                       | 0.082134     |
| Thermal correction to Energy=                | 0.095591     |
| Thermal correction to Enthalpy=              | 0.096535     |
| Thermal correction to Gibbs Free Energy=     | 0.040104     |
| Sum of electronic and zero-point Energies=   | -1105.181337 |
| Sum of electronic and thermal Energies=      | -1105.167880 |
| Sum of electronic and thermal Enthalpies=    | -1105.166935 |
| Sum of electronic and thermal Free Energies= | -1105.223367 |

**13<sup>+</sup>**

|    |              |              |              |
|----|--------------|--------------|--------------|
| 75 | -0.000006000 | 0.073028000  | -0.196773000 |
| 15 | -1.793003000 | -1.679420000 | -0.193285000 |
| 15 | 1.792960000  | -1.679460000 | -0.193341000 |
| 6  | 0.000016000  | 0.250240000  | 1.682219000  |
| 8  | 0.000075000  | 0.336161000  | 2.833567000  |
| 6  | -1.396735000 | 1.450363000  | -0.342394000 |
| 8  | -2.209941000 | 2.255458000  | -0.428244000 |
| 6  | 1.396761000  | 1.450326000  | -0.342388000 |
| 8  | 2.209993000  | 2.255396000  | -0.428241000 |
| 1  | -2.294327000 | -2.079131000 | -1.451005000 |
| 1  | -1.526279000 | -2.944110000 | 0.369202000  |
| 1  | -2.999951000 | -1.364495000 | 0.459978000  |
| 1  | 2.294217000  | -2.079163000 | -1.451090000 |
| 1  | 1.526235000  | -2.944151000 | 0.369143000  |
| 1  | 2.999943000  | -1.364566000 | 0.459871000  |

E(RB3LYP) = -1105.26509911

|                                              |              |
|----------------------------------------------|--------------|
| Zero-point correction=                       | 0.081934     |
| Thermal correction to Energy=                | 0.095463     |
| Thermal correction to Enthalpy=              | 0.096407     |
| Thermal correction to Gibbs Free Energy=     | 0.039729     |
| Sum of electronic and zero-point Energies=   | -1105.183165 |
| Sum of electronic and thermal Energies=      | -1105.169636 |
| Sum of electronic and thermal Enthalpies=    | -1105.168692 |
| Sum of electronic and thermal Free Energies= | -1105.225370 |

**14<sup>+</sup>**

|    |              |              |              |
|----|--------------|--------------|--------------|
| 75 | -0.00002000  | 0.000045000  | -0.178781000 |
| 6  | 0.000085000  | 0.000063000  | 1.683036000  |
| 8  | 0.000059000  | -0.000065000 | 2.849053000  |
| 15 | 1.710568000  | -1.703737000 | -0.264708000 |
| 1  | 2.153716000  | -2.144467000 | -1.535085000 |
| 1  | 2.972586000  | -1.448307000 | 0.317952000  |
| 1  | 1.460051000  | -2.967054000 | 0.317261000  |
| 15 | -1.703746000 | -1.710471000 | -0.264696000 |
| 1  | -1.448869000 | -2.972234000 | 0.318752000  |
| 1  | -2.967484000 | -1.459598000 | 0.316228000  |
| 1  | -2.143583000 | -2.154183000 | -1.535192000 |
| 15 | -1.710593000 | 1.703557000  | -0.264638000 |
| 15 | 1.703746000  | 1.710491000  | -0.264725000 |
| 1  | -2.154390000 | 2.143163000  | -1.535190000 |
| 1  | -2.972297000 | 1.448324000  | 0.318796000  |
| 1  | -1.460171000 | 2.967430000  | 0.316180000  |
| 1  | 1.448865000  | 2.972241000  | 0.318747000  |
| 1  | 2.967476000  | 1.459588000  | 0.316204000  |
| 1  | 2.143613000  | 2.154225000  | -1.535204000 |

E(RB3LYP) = -1564.90258269

|                                              |              |
|----------------------------------------------|--------------|
| Zero-point correction=                       | 0.121280     |
| Thermal correction to Energy=                | 0.136186     |
| Thermal correction to Enthalpy=              | 0.137131     |
| Thermal correction to Gibbs Free Energy=     | 0.078173     |
| Sum of electronic and zero-point Energies=   | -1564.781303 |
| Sum of electronic and thermal Energies=      | -1564.766396 |
| Sum of electronic and thermal Enthalpies=    | -1564.765452 |
| Sum of electronic and thermal Free Energies= | -1564.824409 |

**15<sup>+</sup>**

|    |              |              |              |
|----|--------------|--------------|--------------|
| 75 | -0.000198000 | -0.000419000 | -0.200338000 |
| 7  | -0.001251000 | -0.000489000 | 1.707978000  |
| 7  | -0.002099000 | -0.000448000 | 2.836398000  |
| 15 | 1.730551000  | -1.689960000 | -0.232279000 |
| 1  | 2.849975000  | -1.545828000 | -1.085151000 |
| 1  | 2.418885000  | -1.919648000 | 0.981840000  |
| 1  | 1.412643000  | -3.031784000 | -0.551119000 |
| 15 | -1.700736000 | -1.719848000 | -0.238389000 |
| 1  | -1.357216000 | -3.058883000 | -0.541683000 |
| 1  | -2.403271000 | -1.950962000 | 0.967281000  |
| 1  | -2.809708000 | -1.599766000 | -1.108574000 |
| 15 | -1.728077000 | 1.692104000  | -0.233049000 |
| 15 | 1.700145000  | 1.719523000  | -0.237142000 |
| 1  | -2.853192000 | 1.546762000  | -1.078179000 |
| 1  | -2.408207000 | 1.930462000  | 0.984046000  |
| 1  | -1.408055000 | 3.031173000  | -0.561179000 |
| 1  | 1.355699000  | 3.059007000  | -0.537402000 |
| 1  | 2.405091000  | 1.948812000  | 0.967468000  |
| 1  | 2.807432000  | 1.601372000  | -1.109760000 |

E(RB3LYP) = -1561.05458428

|                               |          |
|-------------------------------|----------|
| Zero-point correction=        | 0.120996 |
| Thermal correction to Energy= | 0.136226 |

|                                              |              |
|----------------------------------------------|--------------|
| Thermal correction to Enthalpy=              | 0.137170     |
| Thermal correction to Gibbs Free Energy=     | 0.076510     |
| Sum of electronic and zero-point Energies=   | -1560.933589 |
| Sum of electronic and thermal Energies=      | -1560.918358 |
| Sum of electronic and thermal Enthalpies=    | -1560.917414 |
| Sum of electronic and thermal Free Energies= | -1560.978074 |

**16<sup>+</sup>**

|    |              |              |              |
|----|--------------|--------------|--------------|
| 75 | -0.000009000 | -0.046380000 | -0.184610000 |
| 15 | -2.434409000 | -0.076036000 | -0.292160000 |
| 15 | 2.434433000  | -0.077839000 | -0.292061000 |
| 15 | 0.000922000  | 2.447501000  | -0.182480000 |
| 8  | -0.001249000 | -3.141817000 | -0.382683000 |
| 8  | -0.000230000 | -0.208832000 | 2.844801000  |
| 6  | -0.000768000 | -1.991196000 | -0.310642000 |
| 6  | -0.000142000 | -0.155994000 | 1.685742000  |
| 1  | -3.024608000 | -0.168611000 | -1.573236000 |
| 1  | -3.176790000 | 1.010858000  | 0.218220000  |
| 1  | -3.101144000 | -1.139810000 | 0.347645000  |
| 1  | 3.177625000  | 1.008667000  | 0.217982000  |
| 1  | 3.024538000  | -0.171253000 | -1.573119000 |
| 1  | 3.100378000  | -1.141902000 | 0.348080000  |
| 1  | -1.074534000 | 3.131142000  | 0.423332000  |
| 1  | 0.001833000  | 3.103257000  | -1.434524000 |
| 1  | 1.076478000  | 3.130065000  | 0.424373000  |

E(RB3LYP) = -1335.08780829

|                                              |              |
|----------------------------------------------|--------------|
| Zero-point correction=                       | 0.101755     |
| Thermal correction to Energy=                | 0.115969     |
| Thermal correction to Enthalpy=              | 0.116913     |
| Thermal correction to Gibbs Free Energy=     | 0.059070     |
| Sum of electronic and zero-point Energies=   | -1334.986053 |
| Sum of electronic and thermal Energies=      | -1334.971840 |
| Sum of electronic and thermal Enthalpies=    | -1334.970895 |
| Sum of electronic and thermal Free Energies= | -1335.028739 |

**17<sup>+</sup>**

|    |              |              |              |
|----|--------------|--------------|--------------|
| 75 | 0.000039000  | -0.035754000 | -0.219946000 |
| 15 | -0.000417000 | 2.374695000  | -0.224600000 |
| 15 | -2.407799000 | -0.068181000 | -0.341405000 |
| 15 | 2.407876000  | -0.067685000 | -0.341533000 |
| 15 | 0.000139000  | -0.184434000 | 2.073671000  |
| 7  | 0.000102000  | -2.022334000 | -0.387603000 |
| 7  | 0.000062000  | -3.140060000 | -0.492580000 |
| 1  | -0.000812000 | 3.016649000  | -1.487371000 |
| 1  | -1.067961000 | 3.097046000  | 0.359342000  |
| 1  | 1.066961000  | 3.097600000  | 0.358956000  |
| 1  | -3.082055000 | -1.292346000 | -0.128340000 |
| 1  | -3.171713000 | 0.752154000  | 0.521965000  |
| 1  | -3.026564000 | 0.296809000  | -1.561567000 |
| 1  | 3.082386000  | -1.291689000 | -0.128345000 |
| 1  | 3.171617000  | 0.752899000  | 0.521756000  |
| 1  | 3.026557000  | 0.297302000  | -1.561736000 |

|                                              |              |              |              |
|----------------------------------------------|--------------|--------------|--------------|
| 1                                            | -1.070113000 | 0.378108000  | 2.812463000  |
| 1                                            | -0.000249000 | -1.479586000 | 2.645797000  |
| 1                                            | 1.070854000  | 0.377414000  | 2.812325000  |
| E(RB3LYP) = -1561.06121176                   |              |              |              |
| Zero-point correction=                       |              |              | 0.121662     |
| Thermal correction to Energy=                |              |              | 0.136466     |
| Thermal correction to Enthalpy=              |              |              | 0.137410     |
| Thermal correction to Gibbs Free Energy=     |              |              | 0.079010     |
| Sum of electronic and zero-point Energies=   |              |              | -1560.939550 |
| Sum of electronic and thermal Energies=      |              |              | -1560.924746 |
| Sum of electronic and thermal Enthalpies=    |              |              | -1560.923802 |
| Sum of electronic and thermal Free Energies= |              |              | -1560.982202 |

**18<sup>+</sup>**

|    |              |              |              |
|----|--------------|--------------|--------------|
| 26 | -0.000055000 | 0.000014000  | -0.431906000 |
| 15 | 2.350070000  | -0.001373000 | -0.350290000 |
| 1  | 3.097727000  | -0.003008000 | -1.547139000 |
| 1  | 2.914107000  | 1.087677000  | 0.336003000  |
| 1  | 2.912575000  | -1.089865000 | 0.338127000  |
| 6  | 0.001227000  | 1.876462000  | -0.352559000 |
| 8  | 0.002271000  | 3.007204000  | -0.246136000 |
| 15 | -2.350169000 | 0.001420000  | -0.350283000 |
| 6  | -0.001151000 | -1.876440000 | -0.352644000 |
| 1  | -3.097707000 | 0.003616000  | -1.547206000 |
| 1  | -2.914352000 | -1.087897000 | 0.335468000  |
| 1  | -2.912663000 | 1.089659000  | 0.338540000  |
| 8  | -0.001895000 | -3.007184000 | -0.246238000 |
| 17 | -0.000013000 | -0.000091000 | 1.862033000  |

E(RB3LYP) = -1496.39487650

|                                              |              |
|----------------------------------------------|--------------|
| Zero-point correction=                       | 0.074353     |
| Thermal correction to Energy=                | 0.087590     |
| Thermal correction to Enthalpy=              | 0.088534     |
| Thermal correction to Gibbs Free Energy=     | 0.034034     |
| Sum of electronic and zero-point Energies=   | -1496.320523 |
| Sum of electronic and thermal Energies=      | -1496.307287 |
| Sum of electronic and thermal Enthalpies=    | -1496.306343 |
| Sum of electronic and thermal Free Energies= | -1496.360843 |

**19<sup>+</sup>**

|    |              |              |              |
|----|--------------|--------------|--------------|
| 26 | -0.000055000 | 0.000014000  | -0.431906000 |
| 15 | 2.350070000  | -0.001373000 | -0.350290000 |
| 1  | 3.097727000  | -0.003008000 | -1.547139000 |
| 1  | 2.914107000  | 1.087677000  | 0.336003000  |
| 1  | 2.912575000  | -1.089865000 | 0.338127000  |
| 6  | 0.001227000  | 1.876462000  | -0.352559000 |
| 8  | 0.002271000  | 3.007204000  | -0.246136000 |
| 15 | -2.350169000 | 0.001420000  | -0.350283000 |
| 6  | -0.001151000 | -1.876440000 | -0.352644000 |
| 1  | -3.097707000 | 0.003616000  | -1.547206000 |

|    |              |              |              |
|----|--------------|--------------|--------------|
| 1  | -2.914352000 | -1.087897000 | 0.335468000  |
| 1  | -2.912663000 | 1.089659000  | 0.338540000  |
| 8  | -0.001895000 | -3.007184000 | -0.246238000 |
| 17 | -0.000013000 | -0.000091000 | 1.862033000  |

E(RB3LYP) = -1136.02039997

|                                              |              |
|----------------------------------------------|--------------|
| Zero-point correction=                       | 0.075000     |
| Thermal correction to Energy=                | 0.088046     |
| Thermal correction to Enthalpy=              | 0.088990     |
| Thermal correction to Gibbs Free Energy=     | 0.034954     |
| Sum of electronic and zero-point Energies=   | -1135.945400 |
| Sum of electronic and thermal Energies=      | -1135.932354 |
| Sum of electronic and thermal Enthalpies=    | -1135.931410 |
| Sum of electronic and thermal Free Energies= | -1135.985446 |

**20+**

|    |              |              |              |
|----|--------------|--------------|--------------|
| 26 | 0.000028000  | 0.754579000  | 0.000014000  |
| 15 | -1.703704000 | 0.686348000  | 1.585162000  |
| 15 | -1.773679000 | 0.864117000  | -1.491619000 |
| 15 | 1.703750000  | 0.686298000  | -1.585148000 |
| 15 | 1.773739000  | 0.863964000  | 1.491650000  |
| 7  | -0.000026000 | -1.200777000 | -0.000015000 |
| 1  | -1.680730000 | -0.495343000 | 2.349611000  |
| 1  | -1.888864000 | 1.641886000  | 2.610635000  |
| 1  | -2.231778000 | 2.166835000  | -1.806926000 |
| 1  | -1.765776000 | 0.319000000  | -2.791558000 |
| 6  | -3.255235000 | 0.095746000  | -0.671129000 |
| 6  | -3.379447000 | 0.665520000  | 0.750894000  |
| 1  | 1.888921000  | 1.641801000  | -2.610652000 |
| 1  | 1.680748000  | -0.495417000 | -2.349561000 |
| 1  | 2.231869000  | 2.166644000  | 1.807069000  |
| 1  | 1.765817000  | 0.318735000  | 2.791542000  |
| 6  | 3.379494000  | 0.665452000  | -0.750888000 |
| 6  | 3.255282000  | 0.095618000  | 0.671111000  |
| 6  | 0.271862000  | -2.026964000 | 1.071322000  |
| 6  | 0.175853000  | -3.356540000 | 0.684778000  |
| 6  | -0.176155000 | -3.356503000 | -0.684860000 |
| 6  | -0.271998000 | -2.026906000 | -1.071375000 |
| 1  | -4.164674000 | 0.272842000  | -1.251213000 |
| 1  | -3.060938000 | -0.981239000 | -0.650131000 |
| 1  | -4.095028000 | 0.094236000  | 1.347488000  |
| 1  | -3.733039000 | 1.701778000  | 0.720410000  |
| 1  | 4.095081000  | 0.094199000  | -1.347503000 |
| 1  | 3.733076000  | 1.701713000  | -0.720360000 |
| 1  | 4.164725000  | 0.272675000  | 1.251198000  |
| 1  | 3.060975000  | -0.981365000 | 0.650063000  |
| 1  | 0.466530000  | -1.630582000 | 2.058661000  |
| 1  | 0.328759000  | -4.217522000 | 1.321479000  |
| 1  | -0.329156000 | -4.217453000 | -1.321582000 |
| 1  | -0.466607000 | -1.630476000 | -2.058706000 |

E(RB3LYP) = -1860.28182380

|                        |          |
|------------------------|----------|
| Zero-point correction= | 0.264425 |
|------------------------|----------|

|                                              |              |
|----------------------------------------------|--------------|
| Thermal correction to Energy=                | 0.283194     |
| Thermal correction to Enthalpy=              | 0.284138     |
| Thermal correction to Gibbs Free Energy=     | 0.217929     |
| Sum of electronic and zero-point Energies=   | -1860.017399 |
| Sum of electronic and thermal Energies=      | -1859.998630 |
| Sum of electronic and thermal Enthalpies=    | -1859.997686 |
| Sum of electronic and thermal Free Energies= | -1860.063895 |

## 21+

|    |              |              |              |
|----|--------------|--------------|--------------|
| 26 | 0.000067000  | 0.000063000  | -0.418975000 |
| 15 | 1.684181000  | -1.555010000 | -0.306138000 |
| 15 | 1.717992000  | 1.538348000  | -0.342225000 |
| 15 | -1.684087000 | 1.555098000  | -0.306195000 |
| 15 | -1.717852000 | -1.538249000 | -0.343008000 |
| 6  | 3.146403000  | -0.721187000 | 0.488497000  |
| 1  | 2.893406000  | -0.618762000 | 1.548099000  |
| 1  | 4.043269000  | -1.340901000 | 0.408195000  |
| 6  | 3.357766000  | 0.655329000  | -0.161836000 |
| 1  | 3.771108000  | 0.548000000  | -1.170575000 |
| 1  | 4.058583000  | 1.264376000  | 0.414653000  |
| 6  | -3.146364000 | 0.721122000  | 0.488171000  |
| 1  | -2.893454000 | 0.618535000  | 1.547774000  |
| 1  | -4.043239000 | 1.340825000  | 0.407875000  |
| 6  | -3.357647000 | -0.655295000 | -0.162401000 |
| 1  | -3.771010000 | -0.547812000 | -1.171114000 |
| 1  | -4.058429000 | -1.264475000 | 0.413990000  |
| 7  | -0.000746000 | -0.000477000 | 2.643494000  |
| 6  | -0.000279000 | -0.000183000 | 1.472557000  |
| 1  | -1.972821000 | -2.473371000 | -1.371418000 |
| 1  | 1.656946000  | 2.408452000  | 0.763313000  |
| 1  | 1.503157000  | -2.730014000 | 0.449720000  |
| 1  | -2.221087000 | 2.115394000  | -1.489951000 |
| 1  | -1.503177000 | 2.730013000  | 0.449830000  |
| 1  | -1.656913000 | -2.408923000 | 0.762082000  |
| 1  | 2.221297000  | -2.115167000 | -1.489907000 |
| 1  | 1.973056000  | 2.474008000  | -1.370121000 |

E(RB3LYP) = -1743.56326028

|                                              |              |
|----------------------------------------------|--------------|
| Zero-point correction=                       | 0.201375     |
| Thermal correction to Energy=                | 0.217629     |
| Thermal correction to Enthalpy=              | 0.218574     |
| Thermal correction to Gibbs Free Energy=     | 0.158353     |
| Sum of electronic and zero-point Energies=   | -1743.361885 |
| Sum of electronic and thermal Energies=      | -1743.345631 |
| Sum of electronic and thermal Enthalpies=    | -1743.344687 |
| Sum of electronic and thermal Free Energies= | -1743.404908 |

## 22+

E(RB3LYP) = -2110.94832864

|    |              |             |              |
|----|--------------|-------------|--------------|
| 26 | 0.000003000  | 0.000003000 | -0.444852000 |
| 15 | -1.730600000 | 1.546747000 | -0.377452000 |



|    |              |              |              |
|----|--------------|--------------|--------------|
| 15 | -1.699500000 | -1.561801000 | -0.334669000 |
| 15 | 1.730572000  | -1.546726000 | -0.377537000 |
| 15 | 1.699507000  | 1.561809000  | -0.334719000 |
| 1  | -1.674774000 | 2.406134000  | 0.735546000  |
| 1  | -1.984810000 | 2.485866000  | -1.402795000 |
| 1  | -2.229882000 | -2.133472000 | -1.516316000 |
| 1  | -1.523202000 | -2.726942000 | 0.436322000  |
| 6  | -3.170205000 | -0.718416000 | 0.433944000  |
| 6  | -3.369254000 | 0.657035000  | -0.222279000 |
| 1  | 1.984801000  | -2.485650000 | -1.403056000 |
| 1  | 1.674717000  | -2.406337000 | 0.735287000  |
| 1  | 2.229917000  | 2.133440000  | -1.516372000 |
| 1  | 1.523210000  | 2.726975000  | 0.436235000  |
| 6  | 3.369236000  | -0.657049000 | -0.222194000 |
| 6  | 3.170172000  | 0.718426000  | 0.433973000  |
| 1  | -4.067287000 | -1.336086000 | 0.340146000  |
| 1  | -2.932079000 | -0.613063000 | 1.495961000  |
| 1  | -4.083388000 | 1.264958000  | 0.338939000  |
| 1  | -3.762660000 | 0.547399000  | -1.238834000 |
| 1  | 4.083285000  | -1.264985000 | 0.339119000  |
| 1  | 3.762761000  | -0.547456000 | -1.238706000 |
| 1  | 4.067268000  | 1.336080000  | 0.340195000  |
| 1  | 2.931992000  | 0.613112000  | 1.495981000  |
| 17 | 0.000040000  | -0.000027000 | 1.883145000  |

E(RB3LYP) = -2110.94832864

|                                              |              |
|----------------------------------------------|--------------|
| Zero-point correction=                       | 0.194292     |
| Thermal correction to Energy=                | 0.209917     |
| Thermal correction to Enthalpy=              | 0.210862     |
| Thermal correction to Gibbs Free Energy=     | 0.152038     |
| Sum of electronic and zero-point Energies=   | -2110.754037 |
| Sum of electronic and thermal Energies=      | -2110.738411 |
| Sum of electronic and thermal Enthalpies=    | -2110.737467 |
| Sum of electronic and thermal Free Energies= | -2110.796291 |

### 23<sup>+</sup>

|    |              |              |              |
|----|--------------|--------------|--------------|
| 44 | 0.241226000  | -0.000022000 | -0.144086000 |
| 15 | 0.000365000  | 2.416932000  | -0.228725000 |
| 15 | -0.001231000 | -2.416719000 | -0.228804000 |
| 8  | -4.100993000 | 0.000482000  | 0.020995000  |
| 8  | 1.202894000  | -0.000408000 | 2.706170000  |
| 8  | 3.150730000  | -0.000903000 | -1.152720000 |
| 7  | -1.732255000 | 0.000878000  | -0.310397000 |
| 6  | -2.933561000 | 0.000616000  | -0.124308000 |
| 6  | 0.882084000  | -0.000308000 | 1.605596000  |
| 6  | 2.081069000  | -0.000708000 | -0.748193000 |
| 1  | 1.105796000  | 3.266876000  | -0.034899000 |
| 1  | -0.934226000 | 2.937336000  | 0.683119000  |
| 1  | -0.505431000 | 2.879443000  | -1.457461000 |
| 1  | -0.508681000 | -2.878756000 | -1.457039000 |
| 1  | 1.103869000  | -3.267392000 | -0.036328000 |
| 1  | -0.935097000 | -2.936854000 | 0.683961000  |

E(RB3LYP) = -1174.78052340  
 Zero-point correction= 0.086444  
 Thermal correction to Energy= 0.101436  
 Thermal correction to Enthalpy= 0.102380  
 Thermal correction to Gibbs Free Energy= 0.041072  
 Sum of electronic and zero-point Energies= -1174.694079  
 Sum of electronic and thermal Energies= -1174.679088  
 Sum of electronic and thermal Enthalpies= -1174.678144  
 Sum of electronic and thermal Free Energies= -1174.739451

**24<sup>+</sup>**

|    |              |              |              |
|----|--------------|--------------|--------------|
| 44 | 0.051853000  | 0.000072000  | -0.368656000 |
| 15 | -2.411963000 | -0.000300000 | -0.242755000 |
| 14 | 0.312586000  | 0.001042000  | 2.066042000  |
| 8  | 0.016684000  | 3.121876000  | -0.266453000 |
| 8  | 3.130484000  | -0.001659000 | -0.606336000 |
| 8  | 0.015760000  | -3.121675000 | -0.264958000 |
| 6  | 0.031765000  | 1.984283000  | -0.315188000 |
| 6  | 1.993740000  | -0.000798000 | -0.512366000 |
| 6  | 0.031169000  | -1.984113000 | -0.314251000 |
| 1  | -3.038018000 | -1.083721000 | 0.400780000  |
| 1  | -3.085428000 | -0.001965000 | -1.481736000 |
| 1  | -3.038836000 | 1.084087000  | 0.398353000  |
| 1  | 1.043597000  | -1.223128000 | 2.465503000  |
| 1  | 1.052546000  | 1.220402000  | 2.463682000  |
| 1  | -1.055630000 | 0.006509000  | 2.643824000  |

E(RB3LYP) = -1068.17230358

Zero-point correction= 0.078718  
 Thermal correction to Energy= 0.092700  
 Thermal correction to Enthalpy= 0.093644  
 Thermal correction to Gibbs Free Energy= 0.036190  
 Sum of electronic and zero-point Energies= -1068.093585  
 Sum of electronic and thermal Energies= -1068.079604  
 Sum of electronic and thermal Enthalpies= -1068.078660  
 Sum of electronic and thermal Free Energies= -1068.136113

**25<sup>+</sup>**

|    |              |              |              |
|----|--------------|--------------|--------------|
| 44 | -0.001139000 | 0.097585000  | -0.244051000 |
| 15 | -2.396868000 | -0.117724000 | -0.422318000 |
| 15 | 0.009328000  | 0.148263000  | 2.018100000  |
| 15 | 2.392711000  | -0.130695000 | -0.430880000 |
| 8  | 0.007819000  | 3.144767000  | -0.520440000 |
| 17 | -0.008313000 | -2.293314000 | -0.289173000 |
| 1  | -2.785432000 | -0.623999000 | -1.677766000 |
| 1  | -3.257513000 | 0.992383000  | -0.302125000 |
| 1  | -3.013138000 | -1.041729000 | 0.441525000  |
| 1  | -1.129314000 | -0.383294000 | 2.652738000  |
| 1  | 1.037990000  | -0.592735000 | 2.629041000  |
| 1  | 0.133536000  | 1.398340000  | 2.653423000  |

|   |             |              |              |
|---|-------------|--------------|--------------|
| 1 | 3.007395000 | -1.069478000 | 0.417970000  |
| 1 | 3.261951000 | 0.971823000  | -0.302915000 |
| 1 | 2.770889000 | -0.624634000 | -1.694458000 |
| 6 | 0.004163000 | 2.001683000  | -0.412209000 |

E(RB3LYP) = -1696.74860040

|                                              |              |
|----------------------------------------------|--------------|
| Zero-point correction=                       | 0.094710     |
| Thermal correction to Energy=                | 0.108617     |
| Thermal correction to Enthalpy=              | 0.109561     |
| Thermal correction to Gibbs Free Energy=     | 0.051945     |
| Sum of electronic and zero-point Energies=   | -1696.653891 |
| Sum of electronic and thermal Energies=      | -1696.639984 |
| Sum of electronic and thermal Enthalpies=    | -1696.639040 |
| Sum of electronic and thermal Free Energies= | -1696.696655 |

### 26<sup>+</sup>

|    |              |              |              |
|----|--------------|--------------|--------------|
| 44 | 0.000016000  | -0.120469000 | -0.210703000 |
| 15 | -2.380979000 | -0.456441000 | -0.358938000 |
| 15 | 2.381126000  | -0.455969000 | -0.358894000 |
| 8  | -0.000400000 | 2.825680000  | -1.019839000 |
| 6  | -0.000270000 | 1.731382000  | -0.665983000 |
| 1  | -3.332034000 | 0.580134000  | -0.286078000 |
| 1  | -2.913309000 | -1.386904000 | 0.553214000  |
| 1  | -2.728207000 | -1.063459000 | -1.581212000 |
| 1  | 2.728085000  | -1.063540000 | -1.580969000 |
| 1  | 3.332129000  | 0.580696000  | -0.286731000 |
| 1  | 2.913744000  | -1.385954000 | 0.553580000  |
| 15 | -0.000101000 | 0.442608000  | 1.976472000  |
| 1  | 0.000057000  | -0.690239000 | 2.815499000  |
| 1  | 1.085464000  | 1.182341000  | 2.485301000  |
| 1  | -1.085914000 | 1.181971000  | 2.485314000  |
| 9  | 0.000382000  | -2.064567000 | -0.290218000 |

E(RB3LYP) = -1336.36713201

|                                              |              |
|----------------------------------------------|--------------|
| Zero-point correction=                       | 0.095218     |
| Thermal correction to Energy=                | 0.108869     |
| Thermal correction to Enthalpy=              | 0.109813     |
| Thermal correction to Gibbs Free Energy=     | 0.053306     |
| Sum of electronic and zero-point Energies=   | -1336.271914 |
| Sum of electronic and thermal Energies=      | -1336.258263 |
| Sum of electronic and thermal Enthalpies=    | -1336.257319 |
| Sum of electronic and thermal Free Energies= | -1336.313826 |

### 27<sup>+</sup>

|    |              |              |              |
|----|--------------|--------------|--------------|
| 44 | -0.077596000 | -0.009701000 | -0.211706000 |
| 15 | -2.547281000 | -0.211138000 | -0.231212000 |
| 15 | -0.133496000 | 2.362033000  | -0.349881000 |
| 15 | 0.388723000  | 0.037211000  | 1.979328000  |
| 15 | 0.276901000  | -2.352645000 | -0.345026000 |
| 14 | 2.319688000  | 0.195001000  | -0.620513000 |
| 1  | -3.250112000 | -0.056394000 | -1.450189000 |
| 1  | -3.315438000 | 0.693806000  | 0.537280000  |

|   |              |              |              |
|---|--------------|--------------|--------------|
| 1 | -3.178133000 | -1.403779000 | 0.192506000  |
| 1 | 0.253721000  | 2.888499000  | -1.602130000 |
| 1 | -1.331012000 | 3.092002000  | -0.168725000 |
| 1 | 0.711327000  | 3.122949000  | 0.486177000  |
| 1 | 1.054280000  | 1.168114000  | 2.501998000  |
| 1 | -0.692075000 | -0.032484000 | 2.889969000  |
| 1 | 1.206595000  | -0.980779000 | 2.517924000  |
| 1 | 1.247326000  | -2.955902000 | 0.483000000  |
| 1 | -0.777096000 | -3.276195000 | -0.155764000 |
| 1 | 0.739369000  | -2.804946000 | -1.600952000 |
| 1 | 3.181549000  | -0.916652000 | -0.123137000 |
| 1 | 2.968354000  | 1.466047000  | -0.184777000 |
| 1 | 2.347208000  | 0.160638000  | -2.119049000 |

E(RB3LYP) = -1757.63686158

|                                              |              |
|----------------------------------------------|--------------|
| Zero-point correction=                       | 0.137253     |
| Thermal correction to Energy=                | 0.153427     |
| Thermal correction to Enthalpy=              | 0.154371     |
| Thermal correction to Gibbs Free Energy=     | 0.092982     |
| Sum of electronic and zero-point Energies=   | -1757.499609 |
| Sum of electronic and thermal Energies=      | -1757.483434 |
| Sum of electronic and thermal Enthalpies=    | -1757.482490 |
| Sum of electronic and thermal Free Energies= | -1757.543880 |

**28<sup>+</sup>**

|    |              |              |              |
|----|--------------|--------------|--------------|
| 44 | 0.000071000  | 0.000017000  | -0.415070000 |
| 15 | -1.786853000 | 1.573710000  | -0.276456000 |
| 15 | -1.772938000 | -1.581709000 | -0.280857000 |
| 15 | 1.786822000  | -1.573590000 | -0.276358000 |
| 15 | 1.772970000  | 1.581667000  | -0.280645000 |
| 1  | -1.785169000 | 2.352777000  | 0.897757000  |
| 1  | -2.017018000 | 2.581972000  | -1.239367000 |
| 1  | -2.264472000 | -2.181014000 | -1.464907000 |
| 1  | -1.647771000 | -2.727967000 | 0.529441000  |
| 6  | -3.267263000 | -0.711473000 | 0.417871000  |
| 6  | -3.426362000 | 0.671042000  | -0.232546000 |
| 1  | 2.016642000  | -2.581613000 | -1.239606000 |
| 1  | 1.785233000  | -2.353026000 | 0.897617000  |
| 1  | 2.264333000  | 2.181087000  | -1.464707000 |
| 1  | 1.647873000  | 2.727846000  | 0.529780000  |
| 6  | 3.426447000  | -0.671103000 | -0.232457000 |
| 6  | 3.267463000  | 0.711469000  | 0.417856000  |
| 1  | -4.165894000 | -1.318663000 | 0.279173000  |
| 1  | -3.083387000 | -0.616451000 | 1.492459000  |
| 1  | -4.174134000 | 1.270133000  | 0.293906000  |
| 1  | -3.758551000 | 0.573765000  | -1.272046000 |
| 1  | 4.174110000  | -1.270277000 | 0.294048000  |
| 1  | 3.758682000  | -0.573925000 | -1.271951000 |
| 1  | 4.166019000  | 1.318708000  | 0.278863000  |
| 1  | 3.083876000  | 0.616620000  | 1.492508000  |
| 17 | -0.000307000 | -0.000089000 | 1.983560000  |

E(RB3LYP) = -2081.44555643  
 Zero-point correction= 0.194324  
 Thermal correction to Energy= 0.209916  
 Thermal correction to Enthalpy= 0.210860  
 Thermal correction to Gibbs Free Energy= 0.151546  
 Sum of electronic and zero-point Energies= -2081.251233  
 Sum of electronic and thermal Energies= -2081.235640  
 Sum of electronic and thermal Enthalpies= -2081.234696  
 Sum of electronic and thermal Free Energies= -2081.294010

**29<sup>+</sup>**

|    |              |              |              |
|----|--------------|--------------|--------------|
| 44 | -0.141540000 | 0.018555000  | -0.356092000 |
| 17 | -0.098648000 | -0.101910000 | 2.007891000  |
| 15 | -1.770146000 | -1.660265000 | -0.374670000 |
| 15 | -1.759608000 | 1.697942000  | -0.210426000 |
| 7  | 1.541155000  | -1.393120000 | -0.347607000 |
| 1  | 1.342853000  | -2.140133000 | 0.317774000  |
| 1  | 1.690656000  | -1.843500000 | -1.251468000 |
| 7  | 1.541895000  | 1.406769000  | -0.183715000 |
| 1  | 1.473996000  | 2.285464000  | -0.695915000 |
| 1  | 1.551152000  | 1.646857000  | 0.811228000  |
| 6  | 2.784960000  | -0.681683000 | 0.080635000  |
| 1  | 3.682073000  | -1.245176000 | -0.194402000 |
| 1  | 2.748994000  | -0.602472000 | 1.169910000  |
| 6  | 2.808287000  | 0.705430000  | -0.543041000 |
| 1  | 3.687226000  | 1.262311000  | -0.200744000 |
| 1  | 2.857853000  | 0.641375000  | -1.635241000 |
| 1  | -2.479543000 | -1.966801000 | -1.559575000 |
| 1  | -2.854951000 | -1.545050000 | 0.519386000  |
| 1  | -1.349916000 | -2.967104000 | -0.036731000 |
| 1  | -2.490643000 | 2.098019000  | -1.353539000 |
| 1  | -2.826178000 | 1.516924000  | 0.694509000  |
| 1  | -1.323317000 | 2.972134000  | 0.218814000  |

E(RB3LYP) = -1430.82344291  
 Zero-point correction= 0.174764  
 Thermal correction to Energy= 0.188349  
 Thermal correction to Enthalpy= 0.189294  
 Thermal correction to Gibbs Free Energy= 0.134183  
 Sum of electronic and zero-point Energies= -1430.648679  
 Sum of electronic and thermal Energies= -1430.635093  
 Sum of electronic and thermal Enthalpies= -1430.634149  
 Sum of electronic and thermal Free Energies= -1430.689260

**30<sup>+</sup>**

|    |              |              |              |
|----|--------------|--------------|--------------|
| 44 | -0.000004000 | 0.000003000  | -0.447850000 |
| 17 | 0.000034000  | -0.000031000 | 1.950332000  |
| 15 | -1.941822000 | 1.399966000  | -0.270846000 |
| 15 | -1.941834000 | -1.399955000 | -0.270880000 |
| 15 | 1.941814000  | 1.399962000  | -0.270869000 |
| 15 | 1.941822000  | -1.399955000 | -0.270883000 |

|   |              |              |              |
|---|--------------|--------------|--------------|
| 6 | -3.064926000 | 0.000004000  | 0.265448000  |
| 1 | -4.070061000 | 0.000013000  | -0.159818000 |
| 1 | -3.131904000 | -0.000009000 | 1.356069000  |
| 6 | 3.064920000  | 0.000005000  | 0.265433000  |
| 1 | 4.070054000  | 0.000010000  | -0.159834000 |
| 1 | 3.131896000  | -0.000001000 | 1.356054000  |
| 1 | -2.599477000 | 1.978158000  | -1.378962000 |
| 1 | -2.095620000 | 2.423381000  | 0.685076000  |
| 1 | -2.599499000 | -1.978118000 | -1.379006000 |
| 1 | -2.095639000 | -2.423388000 | 0.685020000  |
| 1 | 2.095631000  | 2.423397000  | 0.685027000  |
| 1 | 2.599448000  | 1.978124000  | -1.379013000 |
| 1 | 2.095617000  | -2.423378000 | 0.685029000  |
| 1 | 2.599478000  | -1.978130000 | -1.379008000 |

E(RB3LYP) = -2002.76576276

|                                              |              |
|----------------------------------------------|--------------|
| Zero-point correction=                       | 0.135313     |
| Thermal correction to Energy=                | 0.148965     |
| Thermal correction to Enthalpy=              | 0.149909     |
| Thermal correction to Gibbs Free Energy=     | 0.094751     |
| Sum of electronic and zero-point Energies=   | -2002.630449 |
| Sum of electronic and thermal Energies=      | -2002.616798 |
| Sum of electronic and thermal Enthalpies=    | -2002.615853 |
| Sum of electronic and thermal Free Energies= | -2002.671012 |

**31<sup>+</sup>**

|    |              |              |              |
|----|--------------|--------------|--------------|
| 42 | -0.000119000 | -0.000001000 | -0.219599000 |
| 15 | 2.541734000  | -0.001841000 | -0.428723000 |
| 15 | -2.541993000 | 0.001835000  | -0.428102000 |
| 7  | 0.000534000  | -0.000121000 | 1.566549000  |
| 8  | 0.000695000  | -0.000187000 | 2.734199000  |
| 6  | 0.001430000  | 2.091127000  | -0.275802000 |
| 8  | 0.002799000  | 3.234359000  | -0.276936000 |
| 1  | 3.070122000  | 0.000847000  | -1.738544000 |
| 1  | 3.266704000  | -1.082621000 | 0.1111783000 |
| 1  | 3.267659000  | 1.075840000  | 0.116693000  |
| 1  | -3.068580000 | 0.003290000  | -1.738678000 |
| 1  | -3.268982000 | -1.077284000 | 0.112995000  |
| 1  | -3.267376000 | 1.081152000  | 0.114756000  |
| 6  | -0.001563000 | -2.091035000 | -0.275997000 |
| 8  | -0.002696000 | -3.234272000 | -0.277075000 |

E(RB3LYP) = -1110.26794286

|                                              |              |
|----------------------------------------------|--------------|
| Zero-point correction=                       | 0.079933     |
| Thermal correction to Energy=                | 0.094129     |
| Thermal correction to Enthalpy=              | 0.095073     |
| Thermal correction to Gibbs Free Energy=     | 0.036808     |
| Sum of electronic and zero-point Energies=   | -1110.188010 |
| Sum of electronic and thermal Energies=      | -1110.173814 |
| Sum of electronic and thermal Enthalpies=    | -1110.172869 |
| Sum of electronic and thermal Free Energies= | -1110.231135 |

Energies=

**32<sup>+</sup>**

|    |              |              |              |
|----|--------------|--------------|--------------|
| 42 | -0.528540000 | 0.003119000  | -0.237462000 |
| 15 | 1.461898000  | -1.619893000 | -0.271233000 |
| 15 | 1.472613000  | 1.625985000  | -0.156530000 |
| 6  | -1.950572000 | -1.471029000 | -0.475079000 |
| 6  | -1.938443000 | 1.497088000  | -0.436838000 |
| 7  | -0.731542000 | -0.025339000 | 1.535518000  |
| 8  | -0.852894000 | -0.039611000 | 2.697899000  |
| 6  | 3.004161000  | -0.710833000 | 0.268225000  |
| 1  | 2.956881000  | -0.637107000 | 1.360084000  |
| 1  | 3.892499000  | -1.297129000 | 0.017777000  |
| 1  | 3.905532000  | 1.260323000  | 0.049257000  |
| 6  | 3.076890000  | 0.684894000  | -0.372235000 |
| 1  | 3.253301000  | 0.606761000  | -1.450926000 |
| 1  | 1.478337000  | -2.800432000 | 0.497687000  |
| 1  | 1.831153000  | -2.156423000 | -1.525733000 |
| 1  | 1.637259000  | 2.734795000  | -1.012445000 |
| 1  | 1.627099000  | 2.270087000  | 1.088758000  |
| 8  | -2.715201000 | 2.332604000  | -0.525814000 |
| 8  | -2.735963000 | -2.296318000 | -0.583046000 |

E(RB3LYP) = -1187.71042096

|                                              |              |
|----------------------------------------------|--------------|
| Zero-point correction=                       | 0.120451     |
| Thermal correction to Energy=                | 0.134864     |
| Thermal correction to Enthalpy=              | 0.135809     |
| Thermal correction to Gibbs Free Energy=     | 0.077872     |
| Sum of electronic and zero-point Energies=   | -1187.589970 |
| Sum of electronic and thermal Energies=      | -1187.575556 |
| Sum of electronic and thermal Enthalpies=    | -1187.574612 |
| Sum of electronic and thermal Free Energies= | -1187.632549 |

**33<sup>+</sup>**

|    |              |              |              |
|----|--------------|--------------|--------------|
| 42 | 0.000036000  | -0.056497000 | -0.204557000 |
| 15 | -2.529207000 | -0.091282000 | -0.371999000 |
| 15 | -0.000225000 | 2.529554000  | -0.239014000 |
| 15 | 2.529377000  | -0.090737000 | -0.371611000 |
| 7  | -0.000287000 | -0.184278000 | 1.569472000  |
| 8  | -0.000556000 | -0.258837000 | 2.740501000  |
| 6  | 0.000329000  | -2.081745000 | -0.395469000 |
| 8  | 0.000499000  | -3.227564000 | -0.483771000 |
| 1  | -3.311034000 | 1.035833000  | -0.034347000 |
| 1  | -3.197338000 | -1.066423000 | 0.395937000  |
| 1  | -3.096202000 | -0.373677000 | -1.635165000 |
| 1  | -1.072297000 | 3.231941000  | 0.352755000  |
| 1  | 1.071172000  | 3.232017000  | 0.353886000  |
| 1  | 0.000409000  | 3.174030000  | -1.497269000 |
| 1  | 3.310994000  | 1.036508000  | -0.033913000 |
| 1  | 3.197656000  | -1.065777000 | 0.396323000  |
| 1  | 3.096469000  | -0.373003000 | -1.634764000 |

E(RB3LYP) = -1340.09610442

|                                              |              |
|----------------------------------------------|--------------|
| Zero-point correction=                       | 0.099367     |
| Thermal correction to Energy=                | 0.114406     |
| Thermal correction to Enthalpy=              | 0.115350     |
| Thermal correction to Gibbs Free Energy=     | 0.055348     |
| Sum of electronic and zero-point Energies=   | -1339.996738 |
| Sum of electronic and thermal Energies=      | -1339.981699 |
| Sum of electronic and thermal Enthalpies=    | -1339.980754 |
| Sum of electronic and thermal Free Energies= | -1340.040757 |

**34<sup>+</sup>**

|    |              |              |              |
|----|--------------|--------------|--------------|
| 42 | -0.000009000 | -0.000065000 | -0.164906000 |
| 15 | -1.914150000 | 1.597205000  | -0.331402000 |
| 15 | -1.926550000 | -1.600746000 | -0.248096000 |
| 15 | 1.914280000  | -1.597162000 | -0.331482000 |
| 15 | 1.926385000  | 1.600765000  | -0.248134000 |
| 6  | -3.508931000 | 0.712551000  | 0.107954000  |
| 1  | -3.531369000 | 0.642844000  | 1.201203000  |
| 1  | -4.373739000 | 1.305160000  | -0.202573000 |
| 6  | -3.545846000 | -0.686158000 | -0.525965000 |
| 1  | -3.681985000 | -0.611696000 | -1.611115000 |
| 1  | -4.382203000 | -1.271168000 | -0.134174000 |
| 6  | 3.508956000  | -0.712367000 | 0.107975000  |
| 1  | 3.531326000  | -0.642680000 | 1.201226000  |
| 1  | 4.373830000  | -1.304901000 | -0.202513000 |
| 6  | 3.545793000  | 0.686354000  | -0.525914000 |
| 1  | 3.682011000  | 0.611927000  | -1.611056000 |
| 1  | 4.382067000  | 1.271437000  | -0.134054000 |
| 8  | 0.000104000  | -0.000130000 | 2.787837000  |
| 7  | 0.000054000  | -0.000095000 | 1.602563000  |
| 1  | 2.069975000  | 2.697755000  | -1.128914000 |
| 1  | -2.155692000 | -2.280029000 | 0.968719000  |
| 1  | -2.010021000 | 2.790106000  | 0.417967000  |
| 1  | 2.220688000  | -2.131834000 | -1.607339000 |
| 1  | 2.010308000  | -2.790107000 | 0.417799000  |
| 1  | 2.155425000  | 2.280218000  | 0.968605000  |
| 1  | -2.220458000 | 2.132006000  | -1.607227000 |
| 1  | -2.070313000 | -2.697813000 | -1.128752000 |

E(RB3LYP) = -1724.79788413

|                                              |              |
|----------------------------------------------|--------------|
| Zero-point correction=                       | 0.199579     |
| Thermal correction to Energy=                | 0.216048     |
| Thermal correction to Enthalpy=              | 0.216992     |
| Thermal correction to Gibbs Free Energy=     | 0.155113     |
| Sum of electronic and zero-point Energies=   | -1724.598305 |
| Sum of electronic and thermal Energies=      | -1724.581836 |
| Sum of electronic and thermal Enthalpies=    | -1724.580892 |
| Sum of electronic and thermal Free Energies= | -1724.642771 |

**35<sup>+</sup>**

|    |              |              |              |
|----|--------------|--------------|--------------|
| 42 | 0.000015000  | -0.000015000 | -0.192371000 |
| 15 | 1.744912000  | 1.802089000  | -0.338665000 |
| 15 | 1.802255000  | -1.744687000 | -0.338767000 |
| 15 | -1.744864000 | -1.801966000 | -0.339082000 |



|    |              |              |              |
|----|--------------|--------------|--------------|
| 7  | -0.000244000 | -0.000235000 | 1.579228000  |
| 8  | -0.000469000 | -0.000421000 | 2.759832000  |
| 1  | 2.159092000  | 2.228817000  | -1.623130000 |
| 1  | 3.025116000  | 1.588506000  | 0.221988000  |
| 1  | 1.489412000  | 3.075138000  | 0.220703000  |
| 1  | 3.074776000  | -1.489288000 | 0.221861000  |
| 1  | 1.588676000  | -3.025483000 | 0.220540000  |
| 1  | 2.230167000  | -2.157520000 | -1.623274000 |
| 1  | -1.489834000 | -3.074840000 | 0.220896000  |
| 1  | -3.025344000 | -1.588020000 | 0.220816000  |
| 1  | -2.158413000 | -2.229066000 | -1.623630000 |
| 15 | -1.802044000 | 1.744858000  | -0.338800000 |
| 1  | -2.229675000 | 2.158133000  | -1.623257000 |
| 1  | -3.074689000 | 1.489433000  | 0.221535000  |
| 1  | -1.588338000 | 3.025423000  | 0.220972000  |

E(RB3LYP) = -1569.91717391

|                                              |              |
|----------------------------------------------|--------------|
| Zero-point correction=                       | 0.118605     |
| Thermal correction to Energy=                | 0.134461     |
| Thermal correction to Enthalpy=              | 0.135406     |
| Thermal correction to Gibbs Free Energy=     | 0.073772     |
| Sum of electronic and zero-point Energies=   | -1569.798569 |
| Sum of electronic and thermal Energies=      | -1569.782712 |
| Sum of electronic and thermal Enthalpies=    | -1569.781768 |
| Sum of electronic and thermal Free Energies= | -1569.843402 |

### 36<sup>+</sup>

|    |              |              |              |
|----|--------------|--------------|--------------|
| 42 | -0.000005000 | -0.000028000 | -0.116772000 |
| 15 | -1.923155000 | 1.616516000  | -0.269925000 |
| 15 | -1.926783000 | -1.626146000 | -0.210879000 |
| 15 | 1.926741000  | 1.626128000  | -0.210900000 |
| 15 | 1.923196000  | -1.616525000 | -0.269953000 |
| 7  | 0.000012000  | -0.000035000 | 1.648487000  |
| 8  | 0.000030000  | -0.000046000 | 2.835567000  |
| 6  | -3.474780000 | 0.685615000  | 0.167967000  |
| 1  | -3.384633000 | 0.497205000  | 1.248393000  |
| 6  | -4.871493000 | 1.253707000  | -0.138094000 |
| 1  | -5.176374000 | 2.017005000  | 0.582050000  |
| 1  | -4.872309000 | 1.722267000  | -1.128905000 |
| 6  | -5.805766000 | 0.004355000  | -0.127534000 |
| 1  | -6.494162000 | 0.032681000  | -0.975847000 |
| 1  | -6.419564000 | -0.022459000 | 0.776281000  |
| 6  | -4.875388000 | -1.247350000 | -0.191828000 |
| 1  | -4.823790000 | -1.735347000 | 0.787883000  |
| 1  | -5.220661000 | -1.996255000 | -0.908951000 |
| 6  | -3.493116000 | -0.678958000 | -0.562051000 |
| 1  | -3.462011000 | -0.484295000 | -1.645841000 |
| 1  | -2.003828000 | 2.794975000  | 0.505662000  |
| 1  | -2.257789000 | 2.175988000  | -1.529009000 |
| 1  | -2.043728000 | -2.748055000 | -1.065926000 |
| 1  | -2.210519000 | -2.268211000 | 1.016154000  |
| 6  | 3.474790000  | -0.685583000 | 0.167956000  |
| 1  | 3.384626000  | -0.497174000 | 1.248382000  |

|   |             |              |              |
|---|-------------|--------------|--------------|
| 6 | 4.871520000 | -1.253643000 | -0.138087000 |
| 1 | 5.176410000 | -2.016934000 | 0.582062000  |
| 1 | 4.872360000 | -1.722203000 | -1.128897000 |
| 6 | 5.805763000 | -0.004268000 | -0.127515000 |
| 1 | 6.494172000 | -0.032579000 | -0.975819000 |
| 1 | 6.419549000 | 0.022561000  | 0.776308000  |
| 6 | 4.875357000 | 1.247415000  | -0.191823000 |
| 1 | 5.220622000 | 1.996326000  | -0.908943000 |
| 1 | 4.823736000 | 1.735413000  | 0.787887000  |
| 6 | 3.493103000 | 0.678989000  | -0.562061000 |
| 1 | 3.462015000 | 0.484326000  | -1.645852000 |
| 1 | 2.210461000 | 2.268235000  | 1.016114000  |
| 1 | 2.043628000 | 2.748021000  | -1.065976000 |
| 1 | 2.003917000 | -2.794995000 | 0.505613000  |
| 1 | 2.257851000 | -2.175963000 | -1.529046000 |

E(RB3LYP) = -1958.26214553

|                                              |              |
|----------------------------------------------|--------------|
| Zero-point correction=                       | 0.328906     |
| Thermal correction to Energy=                | 0.350539     |
| Thermal correction to Enthalpy=              | 0.351483     |
| Thermal correction to Gibbs Free Energy=     | 0.277178     |
| Sum of electronic and zero-point Energies=   | -1957.933240 |
| Sum of electronic and thermal Energies=      | -1957.911607 |
| Sum of electronic and thermal Enthalpies=    | -1957.910663 |
| Sum of electronic and thermal Free Energies= | -1957.984967 |

**37<sup>+</sup>**

|    |              |              |              |
|----|--------------|--------------|--------------|
| 74 | 0.052861000  | -0.000076000 | -0.182062000 |
| 8  | 0.043012000  | 3.227872000  | -0.281770000 |
| 8  | 0.032036000  | -3.227952000 | -0.281725000 |
| 8  | 3.225235000  | -0.005142000 | -0.600764000 |
| 8  | 0.325971000  | -0.000458000 | 2.766212000  |
| 15 | -2.533925000 | 0.003956000  | -0.256635000 |
| 6  | 0.043647000  | 2.086356000  | -0.258649000 |
| 6  | 0.036648000  | -2.086445000 | -0.258609000 |
| 6  | 2.091617000  | -0.003359000 | -0.456104000 |
| 7  | 0.228932000  | -0.000357000 | 1.604047000  |
| 1  | -3.210958000 | 1.090939000  | 0.328570000  |
| 1  | -3.121533000 | 0.004485000  | -1.539476000 |
| 1  | -3.214375000 | -1.080520000 | 0.329251000  |

E(RB3LYP) = -880.725322792

|                                              |             |
|----------------------------------------------|-------------|
| Zero-point correction=                       | 0.060676    |
| Thermal correction to Energy=                | 0.073830    |
| Thermal correction to Enthalpy=              | 0.074774    |
| Thermal correction to Gibbs Free Energy=     | 0.018453    |
| Sum of electronic and zero-point Energies=   | -880.664647 |
| Sum of electronic and thermal Energies=      | -880.651493 |
| Sum of electronic and thermal Enthalpies=    | -880.650549 |
| Sum of electronic and thermal Free Energies= | -880.706870 |

**38+**

|    |              |              |              |
|----|--------------|--------------|--------------|
| 74 | 0.000065000  | -0.000029000 | -0.162590000 |
| 15 | 2.518744000  | 0.000968000  | -0.399396000 |
| 15 | -2.518542000 | -0.000808000 | -0.399853000 |
| 7  | -0.000376000 | -0.000011000 | 1.625242000  |
| 8  | -0.000657000 | -0.000001000 | 2.798516000  |
| 6  | -0.000794000 | 2.068710000  | -0.233458000 |
| 8  | -0.001348000 | 3.214841000  | -0.253341000 |
| 1  | 3.027363000  | 0.001650000  | -1.716967000 |
| 1  | 3.242966000  | 1.083970000  | 0.136850000  |
| 1  | 3.243986000  | -1.081724000 | 0.136102000  |
| 1  | -3.242950000 | -1.083880000 | 0.136012000  |
| 1  | -3.243511000 | 1.081796000  | 0.136191000  |
| 1  | -3.027272000 | -0.000862000 | -1.717373000 |
| 6  | 0.000830000  | -2.068789000 | -0.233474000 |
| 8  | 0.001251000  | -3.214917000 | -0.253365000 |

E(RB3LYP) = -1110.55656229

|                                              |              |
|----------------------------------------------|--------------|
| Zero-point correction=                       | 0.080413     |
| Thermal correction to Energy=                | 0.094367     |
| Thermal correction to Enthalpy=              | 0.095311     |
| Thermal correction to Gibbs Free Energy=     | 0.037088     |
| Sum of electronic and zero-point Energies=   | -1110.476150 |
| Sum of electronic and thermal Energies=      | -1110.462196 |
| Sum of electronic and thermal Enthalpies=    | -1110.461251 |
| Sum of electronic and thermal Free Energies= | -1110.519475 |

**39+**

|    |              |              |              |
|----|--------------|--------------|--------------|
| 74 | 0.000030000  | -0.000022000 | -0.148008000 |
| 15 | 1.467236000  | 2.003651000  | -0.308769000 |
| 15 | 2.003729000  | -1.467256000 | -0.308679000 |
| 15 | -1.467332000 | -2.003623000 | -0.308748000 |
| 7  | -0.000023000 | 0.000044000  | 1.626400000  |
| 8  | -0.000087000 | 0.000113000  | 2.813272000  |
| 1  | 1.826737000  | 2.462914000  | -1.598570000 |
| 1  | 2.760561000  | 1.966903000  | 0.262447000  |
| 1  | 1.036143000  | 3.237498000  | 0.232395000  |
| 1  | 3.237983000  | -1.035688000 | 0.231190000  |
| 1  | 1.967242000  | -2.759955000 | 0.263926000  |
| 1  | 2.462121000  | -1.828125000 | -1.598408000 |
| 1  | -1.035936000 | -3.238079000 | 0.230761000  |
| 1  | -2.759890000 | -1.966975000 | 0.264167000  |
| 1  | -1.828592000 | -2.461660000 | -1.598467000 |
| 15 | -2.003666000 | 1.467227000  | -0.308759000 |
| 1  | -1.967026000 | 2.760210000  | 0.263198000  |
| 1  | -2.462521000 | 1.827469000  | -1.598493000 |
| 1  | -3.237723000 | 1.035926000  | 0.231769000  |

E(RB3LYP) = -1570.19759214

|                                 |          |
|---------------------------------|----------|
| Zero-point correction=          | 0.119488 |
| Thermal correction to Energy=   | 0.134888 |
| Thermal correction to Enthalpy= | 0.135832 |

|                                              |              |
|----------------------------------------------|--------------|
| Thermal correction to Gibbs Free Energy=     | 0.075206     |
| Sum of electronic and zero-point Energies=   | -1570.078104 |
| Sum of electronic and thermal Energies=      | -1570.062704 |
| Sum of electronic and thermal Enthalpies=    | -1570.061760 |
| Sum of electronic and thermal Free Energies= | -1570.122387 |

**40<sup>+</sup>**

|    |              |              |              |
|----|--------------|--------------|--------------|
| 74 | 0.000007000  | -0.041681000 | -0.153623000 |
| 15 | -2.505629000 | -0.081432000 | -0.335700000 |
| 15 | 0.000992000  | 2.519511000  | -0.217544000 |
| 15 | 2.505514000  | -0.083467000 | -0.335786000 |
| 7  | 0.000042000  | -0.173682000 | 1.621734000  |
| 8  | 0.000051000  | -0.249034000 | 2.798910000  |
| 6  | -0.000929000 | -2.046998000 | -0.361677000 |
| 8  | -0.001490000 | -3.194774000 | -0.472409000 |
| 1  | -3.290334000 | 1.052761000  | -0.027495000 |
| 1  | -3.165895000 | -1.043457000 | 0.454801000  |
| 1  | -3.062482000 | -0.394123000 | -1.596142000 |
| 1  | -1.073949000 | 3.223517000  | 0.367116000  |
| 1  | 1.076387000  | 3.222924000  | 0.366999000  |
| 1  | 0.001102000  | 3.143611000  | -1.485891000 |
| 1  | 3.291015000  | 1.049328000  | -0.024514000 |
| 1  | 3.165355000  | -1.048181000 | 0.451795000  |
| 1  | 3.061896000  | -0.392958000 | -1.597236000 |

E(RB3LYP) = -1340.38111070

|                                              |              |
|----------------------------------------------|--------------|
| Zero-point correction=                       | 0.099908     |
| Thermal correction to Energy=                | 0.114655     |
| Thermal correction to Enthalpy=              | 0.115599     |
| Thermal correction to Gibbs Free Energy=     | 0.055925     |
| Sum of electronic and zero-point Energies=   | -1340.281203 |
| Sum of electronic and thermal Energies=      | -1340.266456 |
| Sum of electronic and thermal Enthalpies=    | -1340.265511 |
| Sum of electronic and thermal Free Energies= | -1340.325186 |

**41<sup>+</sup>**

|    |              |              |              |
|----|--------------|--------------|--------------|
| 74 | -0.000001000 | 0.000000000  | 0.125465000  |
| 15 | -1.897307000 | -1.583330000 | 0.309919000  |
| 15 | -1.908257000 | 1.587860000  | 0.230470000  |
| 15 | 1.897303000  | 1.583330000  | 0.309925000  |
| 15 | 1.908256000  | -1.587858000 | 0.230497000  |
| 6  | -3.507308000 | -0.715359000 | -0.112572000 |
| 1  | -3.547484000 | -0.659305000 | -1.206017000 |
| 1  | -4.361458000 | -1.310964000 | 0.220716000  |
| 6  | -3.539907000 | 0.689957000  | 0.505712000  |
| 1  | -3.686099000 | 0.629196000  | 1.590380000  |
| 1  | -4.366008000 | 1.279373000  | 0.099310000  |
| 6  | 3.507308000  | 0.715360000  | -0.112545000 |
| 1  | 3.547495000  | 0.659299000  | -1.205990000 |
| 1  | 4.361454000  | 1.310968000  | 0.220746000  |
| 6  | 3.539903000  | -0.689952000 | 0.505748000  |

|                                              |              |              |              |              |
|----------------------------------------------|--------------|--------------|--------------|--------------|
| 1                                            | 3.686085000  | -0.629184000 | 1.590416000  |              |
| 1                                            | 4.366008000  | -1.279370000 | 0.099356000  |              |
| 8                                            | 0.000013000  | -0.000009000 | -2.836472000 |              |
| 7                                            | 0.000008000  | -0.000006000 | -1.644671000 |              |
| 1                                            | 2.031284000  | -2.670215000 | 1.132189000  |              |
| 1                                            | -2.125896000 | 2.286461000  | -0.977196000 |              |
| 1                                            | -1.976064000 | -2.770269000 | -0.450338000 |              |
| 1                                            | 2.183602000  | 2.129030000  | 1.585807000  |              |
| 1                                            | 1.976065000  | 2.770265000  | -0.450341000 |              |
| 1                                            | 2.125906000  | -2.286465000 | -0.977164000 |              |
| 1                                            | -2.183619000 | -2.129018000 | 1.585803000  |              |
| 1                                            | -2.031291000 | 2.670222000  | 1.132156000  |              |
| E(RB3LYP) = -1725.08064597                   |              |              |              |              |
| Zero-point correction=                       |              |              |              | 0.199809     |
| Thermal correction to Energy=                |              |              |              | 0.216134     |
| Thermal correction to Enthalpy=              |              |              |              | 0.217078     |
| Thermal correction to Gibbs Free Energy=     |              |              |              | 0.155124     |
| Sum of electronic and zero-point Energies=   |              |              |              | -1724.880837 |
| Sum of electronic and thermal Energies=      |              |              |              | -1724.864512 |
| Sum of electronic and thermal Enthalpies=    |              |              |              | -1724.863568 |
| Sum of electronic and thermal Free Energies= |              |              |              | -1724.925522 |

**42+**

|                               |              |              |              |          |
|-------------------------------|--------------|--------------|--------------|----------|
| 74                            | 0.000000000  | -0.000008000 | 0.028032000  |          |
| 15                            | -1.895092000 | 1.580357000  | -0.180254000 |          |
| 15                            | -1.903661000 | -1.587834000 | -0.192638000 |          |
| 15                            | 1.895108000  | -1.580296000 | -0.180641000 |          |
| 15                            | 1.903657000  | 1.587896000  | -0.192035000 |          |
| 6                             | -3.502720000 | 0.711189000  | 0.250155000  |          |
| 1                             | -3.526156000 | 0.635554000  | 1.342458000  |          |
| 1                             | -4.359920000 | 1.313975000  | -0.062158000 |          |
| 6                             | -3.545921000 | -0.681612000 | -0.395058000 |          |
| 1                             | -3.721573000 | -0.595552000 | -1.473567000 |          |
| 1                             | -4.360193000 | -1.282842000 | 0.017700000  |          |
| 6                             | 3.502689000  | -0.711258000 | 0.250200000  |          |
| 1                             | 3.526017000  | -0.635974000 | 1.342529000  |          |
| 1                             | 4.359922000  | -1.313943000 | -0.062223000 |          |
| 6                             | 3.545951000  | 0.681750000  | -0.394560000 |          |
| 1                             | 3.721727000  | 0.596042000  | -1.473076000 |          |
| 1                             | 4.360170000  | 1.282852000  | 0.018486000  |          |
| 6                             | -0.000033000 | -0.000284000 | 1.787583000  |          |
| 1                             | 2.011209000  | 2.556775000  | -1.217915000 |          |
| 1                             | -2.126569000 | -2.429923000 | 0.914430000  |          |
| 1                             | -1.980174000 | 2.776114000  | 0.563183000  |          |
| 1                             | 2.195102000  | -2.107195000 | -1.462496000 |          |
| 1                             | 1.980149000  | -2.776307000 | 0.562395000  |          |
| 1                             | 2.126465000  | 2.429718000  | 0.915257000  |          |
| 1                             | -2.194974000 | 2.107696000  | -1.461954000 |          |
| 1                             | -2.011157000 | -2.556458000 | -1.218765000 |          |
| 1                             | -0.000053000 | -0.000456000 | 2.874933000  |          |
| E(RB3LYP) = -1633.79259448    |              |              |              |          |
| Zero-point correction=        |              |              |              | 0.205710 |
| Thermal correction to Energy= |              |              |              | 0.221262 |

|                                              |              |
|----------------------------------------------|--------------|
| Thermal correction to Enthalpy=              | 0.222206     |
| Thermal correction to Gibbs Free Energy=     | 0.162611     |
| Sum of electronic and zero-point Energies=   | -1633.586885 |
| Sum of electronic and thermal Energies=      | -1633.571333 |
| Sum of electronic and thermal Enthalpies=    | -1633.570389 |
| Sum of electronic and thermal Free Energies= | -1633.629984 |

### 1...H<sub>2</sub>O

|    |              |              |              |
|----|--------------|--------------|--------------|
| 25 | -0.300250000 | 0.005193000  | -0.048960000 |
| 6  | -1.125456000 | -0.025013000 | 1.587227000  |
| 8  | -1.646294000 | -0.041160000 | 2.613058000  |
| 6  | 0.914891000  | -1.352419000 | 0.330015000  |
| 8  | 1.642352000  | -2.214444000 | 0.525029000  |
| 6  | -1.340094000 | 1.342134000  | -0.780491000 |
| 8  | -1.954911000 | 2.169864000  | -1.285558000 |
| 6  | 0.983756000  | 1.263252000  | 0.354752000  |
| 8  | 1.787418000  | 2.063991000  | 0.539427000  |
| 6  | -1.372656000 | -1.246402000 | -0.882938000 |
| 8  | -2.002693000 | -2.014740000 | -1.457473000 |
| 1  | 0.403640000  | 0.027139000  | -1.456547000 |
| 8  | 3.635723000  | -0.069879000 | -0.776251000 |
| 1  | 3.790964000  | 0.860943000  | -0.572806000 |
| 1  | 3.256259000  | -0.056273000 | -1.663875000 |

E(RB3LYP) = -747.649484709

|                                              |                             |
|----------------------------------------------|-----------------------------|
| Zero-point correction=                       | 0.073604 (Hartree/Particle) |
| Thermal correction to Energy=                | 0.089571                    |
| Thermal correction to Enthalpy=              | 0.090515                    |
| Thermal correction to Gibbs Free Energy=     | 0.027865                    |
| Sum of electronic and zero-point Energies=   | -747.575880                 |
| Sum of electronic and thermal Energies=      | -747.559914                 |
| Sum of electronic and thermal Enthalpies=    | -747.558969                 |
| Sum of electronic and thermal Free Energies= | -747.621620                 |

### 2a ...H<sub>2</sub>O

|    |              |              |              |
|----|--------------|--------------|--------------|
| 25 | 0.322210000  | 0.059889000  | -0.063001000 |
| 15 | -1.366419000 | -1.413348000 | 0.624912000  |
| 8  | 2.236553000  | 1.962761000  | -1.281967000 |
| 8  | 1.425285000  | -2.168693000 | -1.711557000 |
| 8  | 1.887337000  | -0.313475000 | 2.443378000  |
| 6  | 1.505725000  | 1.219572000  | -0.791849000 |
| 6  | 1.030167000  | -1.320627000 | -1.040395000 |
| 6  | 1.272745000  | -0.173162000 | 1.476838000  |
| 1  | -0.963497000 | -2.490102000 | 1.450999000  |
| 1  | -2.088057000 | -2.146043000 | -0.335286000 |
| 1  | -2.441737000 | -0.949332000 | 1.406059000  |
| 1  | -0.493430000 | 0.227767000  | -1.406408000 |
| 6  | -0.744589000 | 1.445547000  | 0.462802000  |
| 8  | -1.464915000 | 2.310426000  | 0.717162000  |
| 8  | -3.332778000 | 0.274301000  | -1.075334000 |
| 1  | -3.448974000 | 1.155601000  | -0.697501000 |
| 1  | -2.519409000 | 0.354561000  | -1.594357000 |

E(RB3LYP) = -977.471575924

|                        |                             |
|------------------------|-----------------------------|
| Zero-point correction= | 0.094685 (Hartree/Particle) |
|------------------------|-----------------------------|

|                                              |             |
|----------------------------------------------|-------------|
| Thermal correction to Energy=                | 0.110518    |
| Thermal correction to Enthalpy=              | 0.111462    |
| Thermal correction to Gibbs Free Energy=     | 0.050674    |
| Sum of electronic and zero-point Energies=   | -977.376891 |
| Sum of electronic and thermal Energies=      | -977.361058 |
| Sum of electronic and thermal Enthalpies=    | -977.360114 |
| Sum of electronic and thermal Free Energies= | -977.420902 |

### 2b... H<sub>2</sub>O

|    |              |              |              |
|----|--------------|--------------|--------------|
| 25 | 0.200235000  | 0.008897000  | -0.108050000 |
| 1  | -0.693162000 | 0.087589000  | -1.368423000 |
| 15 | 1.580139000  | -0.099098000 | 1.716493000  |
| 1  | 1.715779000  | 1.017849000  | 2.575370000  |
| 1  | 1.371644000  | -1.066337000 | 2.728801000  |
| 1  | 2.963320000  | -0.339477000 | 1.535542000  |
| 6  | -0.950920000 | 1.295345000  | 0.510955000  |
| 8  | -1.714849000 | 2.103472000  | 0.814975000  |
| 6  | 1.045953000  | -1.265211000 | -1.130392000 |
| 8  | 1.513702000  | -2.048217000 | -1.832380000 |
| 6  | 1.192608000  | 1.315701000  | -0.938566000 |
| 8  | 1.774816000  | 2.133615000  | -1.502160000 |
| 6  | -0.949585000 | -1.303566000 | 0.517247000  |
| 8  | -1.650437000 | -2.133438000 | 0.888809000  |
| 8  | -3.620272000 | -0.003287000 | -0.892298000 |
| 1  | -3.686521000 | 0.925699000  | -0.638775000 |
| 1  | -2.831037000 | -0.032057000 | -1.449717000 |

E(RB3LYP) = -977.460883545

|                                              |                             |
|----------------------------------------------|-----------------------------|
| Zero-point correction=                       | 0.092943 (Hartree/Particle) |
| Thermal correction to Energy=                | 0.109798                    |
| Thermal correction to Enthalpy=              | 0.110742                    |
| Thermal correction to Gibbs Free Energy=     | 0.045044                    |
| Sum of electronic and zero-point Energies=   | -977.367940                 |
| Sum of electronic and thermal Energies=      | -977.351086                 |
| Sum of electronic and thermal Enthalpies=    | -977.350142                 |
| Sum of electronic and thermal Free Energies= | -977.415840                 |

### 3a... H<sub>2</sub>O

|    |              |              |              |
|----|--------------|--------------|--------------|
| 25 | -0.244011000 | -0.012197000 | -0.008514000 |
| 8  | -1.776987000 | -0.570386000 | 2.473008000  |
| 8  | -1.340159000 | -2.156730000 | -1.765940000 |
| 6  | -1.169587000 | -0.359682000 | 1.509841000  |
| 6  | -0.941003000 | -1.341231000 | -1.052136000 |
| 1  | 0.504042000  | 0.313269000  | -1.380131000 |
| 15 | -1.770059000 | 1.439605000  | -0.857518000 |
| 1  | -1.369604000 | 2.769488000  | -1.125122000 |
| 1  | -2.979917000 | 1.750158000  | -0.186418000 |
| 1  | -2.334855000 | 1.161391000  | -2.123712000 |
| 6  | 0.752110000  | 1.382224000  | 0.602765000  |
| 8  | 1.434574000  | 2.263483000  | 0.915723000  |
| 15 | 1.476208000  | -1.436780000 | 0.532163000  |
| 1  | 2.211126000  | -2.075316000 | -0.486134000 |
| 1  | 1.140402000  | -2.586397000 | 1.288900000  |
| 1  | 2.556049000  | -0.992723000 | 1.322602000  |
| 8  | 3.324137000  | 0.470935000  | -1.171063000 |

|                                              |             |                             |              |
|----------------------------------------------|-------------|-----------------------------|--------------|
| 1                                            | 3.375966000 | 1.291263000                 | -0.664155000 |
| 1                                            | 2.423188000 | 0.485136000                 | -1.529298000 |
| E(RB3LYP) = -1207.28093836                   |             |                             |              |
| Zero-point correction=                       |             | 0.114037 (Hartree/Particle) |              |
| Thermal correction to Energy=                |             | 0.130668                    |              |
| Thermal correction to Enthalpy=              |             | 0.131612                    |              |
| Thermal correction to Gibbs Free Energy=     |             | 0.068982                    |              |
| Sum of electronic and zero-point Energies=   |             | -1207.166902                |              |
| Sum of electronic and thermal Energies=      |             | -1207.150271                |              |
| Sum of electronic and thermal Enthalpies=    |             | -1207.149327                |              |
| Sum of electronic and thermal Free Energies= |             | -1207.211957                |              |

### 3b...H<sub>2</sub>O

|                                              |              |                             |              |
|----------------------------------------------|--------------|-----------------------------|--------------|
| 25                                           | 0.244789000  | 0.068350000                 | -0.128881000 |
| 15                                           | -1.389074000 | -1.402128000                | 0.679232000  |
| 1                                            | -2.114543000 | -2.197477000                | -0.228910000 |
| 1                                            | -0.961630000 | -2.440440000                | 1.548136000  |
| 1                                            | -2.468045000 | -0.938126000                | 1.458052000  |
| 1                                            | -0.658959000 | 0.221855000                 | -1.385515000 |
| 15                                           | 1.629974000  | -0.203101000                | 1.663031000  |
| 1                                            | 1.850631000  | 0.852295000                 | 2.582343000  |
| 1                                            | 1.406547000  | -1.211350000                | 2.639392000  |
| 1                                            | 2.996177000  | -0.507506000                | 1.443658000  |
| 6                                            | -0.760291000 | 1.450714000                 | 0.500192000  |
| 8                                            | -1.461748000 | 2.315906000                 | 0.815323000  |
| 6                                            | 0.889910000  | -1.315923000                | -1.135319000 |
| 8                                            | 1.236539000  | -2.167701000                | -1.834049000 |
| 6                                            | 1.360964000  | 1.218369000                 | -0.948192000 |
| 8                                            | 2.044742000  | 1.961782000                 | -1.511001000 |
| 8                                            | -3.406095000 | 0.267629000                 | -1.019056000 |
| 1                                            | -2.550901000 | 0.313929000                 | -1.474419000 |
| 1                                            | -3.483490000 | 1.136606000                 | -0.604493000 |
| E(RB3LYP) = -1207.27870292                   |              |                             |              |
| Zero-point correction=                       |              | 0.113851 (Hartree/Particle) |              |
| Thermal correction to Energy=                |              | 0.130520                    |              |
| Thermal correction to Enthalpy=              |              | 0.131464                    |              |
| Thermal correction to Gibbs Free Energy=     |              | 0.068833                    |              |
| Sum of electronic and zero-point Energies=   |              | -1207.164852                |              |
| Sum of electronic and thermal Energies=      |              | -1207.148183                |              |
| Sum of electronic and thermal Enthalpies=    |              | -1207.147239                |              |
| Sum of electronic and thermal Free Energies= |              | -1207.209870                |              |

### 3c... H<sub>2</sub>O

|    |              |              |              |
|----|--------------|--------------|--------------|
| 25 | -0.308787000 | -0.000151000 | -0.087882000 |
| 8  | -1.988569000 | -0.002674000 | 2.367479000  |
| 8  | -1.797478000 | -2.092782000 | -1.555783000 |
| 6  | -1.320591000 | -0.001505000 | 1.421846000  |
| 6  | -1.233417000 | -1.281141000 | -0.956574000 |
| 1  | 0.570123000  | 0.000390000  | -1.406868000 |
| 15 | 1.131759000  | 1.663965000  | 0.659360000  |
| 1  | 2.323292000  | 1.344280000  | 1.348177000  |
| 1  | 0.639417000  | 2.627179000  | 1.574238000  |
| 1  | 1.684508000  | 2.564248000  | -0.275127000 |
| 6  | -1.236135000 | 1.279651000  | -0.955410000 |



|    |              |              |              |
|----|--------------|--------------|--------------|
| 8  | -1.802055000 | 2.090797000  | -1.553540000 |
| 15 | 1.134629000  | -1.661641000 | 0.660344000  |
| 1  | 1.687462000  | -2.562960000 | -0.273100000 |
| 1  | 0.643961000  | -2.623855000 | 1.577195000  |
| 1  | 2.326227000  | -1.339494000 | 1.347794000  |
| 8  | 3.170741000  | 0.002184000  | -1.151426000 |
| 1  | 3.689935000  | -0.004376000 | -1.964721000 |
| 1  | 2.238665000  | 0.001268000  | -1.439107000 |

E(RB3LYP) = -1207.28314477

Zero-point correction= 0.114044 (Hartree/Particle)

Thermal correction to Energy= 0.130636

Thermal correction to Enthalpy= 0.131580

Thermal correction to Gibbs Free Energy= 0.069249

Sum of electronic and zero-point Energies= -1207.169100

Sum of electronic and thermal Energies= -1207.152509

Sum of electronic and thermal Enthalpies= -1207.151564

Sum of electronic and thermal Free Energies= -1207.213896

#### 4a ...H<sub>2</sub>O

|    |              |              |              |
|----|--------------|--------------|--------------|
| 25 | 0.188841000  | 0.018511000  | -0.067209000 |
| 15 | 1.577384000  | 1.597768000  | -0.906998000 |
| 1  | 1.133961000  | 2.940378000  | -0.979951000 |
| 1  | 2.864588000  | 1.882994000  | -0.369151000 |
| 1  | 1.991618000  | 1.478796000  | -2.255009000 |
| 15 | -1.439228000 | -1.517907000 | 0.427685000  |
| 1  | -2.147497000 | -2.143243000 | -0.619606000 |
| 1  | -1.059911000 | -2.700411000 | 1.120051000  |
| 1  | -2.545118000 | -1.185455000 | 1.239757000  |
| 1  | -0.637168000 | 0.394230000  | -1.352155000 |
| 15 | 1.480977000  | -0.522384000 | 1.716855000  |
| 1  | 2.870238000  | -0.218914000 | 1.715833000  |
| 1  | 1.231008000  | -0.018718000 | 3.020562000  |
| 1  | 1.636873000  | -1.876881000 | 2.119064000  |
| 6  | -0.816264000 | 1.308432000  | 0.722035000  |
| 8  | -1.517983000 | 2.131114000  | 1.146247000  |
| 6  | 0.904660000  | -1.198538000 | -1.222250000 |
| 8  | 1.305458000  | -1.942427000 | -2.015456000 |
| 8  | -3.404994000 | 0.467313000  | -1.085117000 |
| 1  | -3.444280000 | 1.211555000  | -0.470975000 |
| 1  | -2.492571000 | 0.503391000  | -1.415420000 |

E(RB3LYP) = -1437.08324660

Zero-point correction= 0.133055 (Hartree/Particle)

Thermal correction to Energy= 0.150448

Thermal correction to Enthalpy= 0.151392

Thermal correction to Gibbs Free Energy= 0.087299

Sum of electronic and zero-point Energies= -1436.950192

Sum of electronic and thermal Energies= -1436.932798

Sum of electronic and thermal Enthalpies= -1436.931854

Sum of electronic and thermal Free Energies= -1436.995947

#### 4b...H<sub>2</sub>O

|    |             |             |              |
|----|-------------|-------------|--------------|
| 25 | 0.251882000 | 0.060643000 | -0.026119000 |
| 8  | 1.925312000 | 0.296050000 | 2.414082000  |
| 8  | 1.579988000 | 2.208372000 | -1.559203000 |

|    |              |              |              |
|----|--------------|--------------|--------------|
| 6  | 1.257630000  | 0.206420000  | 1.467539000  |
| 6  | 1.073725000  | 1.371542000  | -0.934720000 |
| 1  | -0.595055000 | -0.139684000 | -1.371680000 |
| 15 | 1.549497000  | -1.442231000 | -1.106442000 |
| 1  | 1.012583000  | -2.702249000 | -1.477581000 |
| 1  | 2.777490000  | -1.940113000 | -0.592855000 |
| 1  | 2.039423000  | -1.087922000 | -2.385498000 |
| 15 | -1.313532000 | 1.599710000  | 0.611046000  |
| 1  | -1.911950000 | 2.424289000  | -0.367165000 |
| 1  | -0.923585000 | 2.636138000  | 1.497185000  |
| 1  | -2.500950000 | 1.227828000  | 1.285499000  |
| 15 | -1.059845000 | -1.662899000 | 0.802346000  |
| 1  | -2.381725000 | -1.406006000 | 1.233429000  |
| 1  | -0.652517000 | -2.416410000 | 1.934079000  |
| 1  | -1.360570000 | -2.766951000 | -0.030627000 |
| 8  | -3.202284000 | -0.258066000 | -1.271293000 |
| 1  | -3.613225000 | -0.000928000 | -2.105569000 |
| 1  | -2.241047000 | -0.201371000 | -1.436076000 |

E(RB3LYP) = -1437.08800023

|                                              |                             |
|----------------------------------------------|-----------------------------|
| Zero-point correction=                       | 0.133358 (Hartree/Particle) |
| Thermal correction to Energy=                | 0.150683                    |
| Thermal correction to Enthalpy=              | 0.151628                    |
| Thermal correction to Gibbs Free Energy=     | 0.087759                    |
| Sum of electronic and zero-point Energies=   | -1436.954642                |
| Sum of electronic and thermal Energies=      | -1436.937317                |
| Sum of electronic and thermal Enthalpies=    | -1436.936373                |
| Sum of electronic and thermal Free Energies= | -1437.000242                |

#### 4c...H<sub>2</sub>O

|    |              |              |              |
|----|--------------|--------------|--------------|
| 25 | -0.239435000 | -0.000173000 | 0.148764000  |
| 15 | 1.136883000  | -1.655405000 | -0.719062000 |
| 1  | 1.654236000  | -2.631791000 | 0.160188000  |
| 1  | 0.636084000  | -2.557417000 | -1.697150000 |
| 1  | 2.348966000  | -1.342545000 | -1.377174000 |
| 15 | 1.133448000  | 1.658819000  | -0.716943000 |
| 1  | 2.346155000  | 1.349239000  | -1.375499000 |
| 1  | 0.631193000  | 2.561688000  | -1.693497000 |
| 1  | 1.649057000  | 2.634578000  | 0.164032000  |
| 1  | 0.763751000  | 0.000739000  | 1.349455000  |
| 15 | -1.713517000 | -0.001001000 | -1.574798000 |
| 1  | -3.103788000 | -0.006935000 | -1.296070000 |
| 1  | -1.763716000 | 1.054721000  | -2.527480000 |
| 1  | -1.756048000 | -1.051366000 | -2.533791000 |
| 6  | -1.091211000 | 1.271246000  | 1.086277000  |
| 8  | -1.602897000 | 2.081921000  | 1.740271000  |
| 6  | -1.087857000 | -1.274252000 | 1.085701000  |
| 8  | -1.597349000 | -2.086516000 | 1.739426000  |
| 8  | 3.335521000  | 0.001428000  | 1.030683000  |
| 1  | 3.825238000  | -0.000419000 | 1.862071000  |
| 1  | 2.394759000  | 0.001010000  | 1.292959000  |

E(RB3LYP) = -1437.08630804

|                               |                             |
|-------------------------------|-----------------------------|
| Zero-point correction=        | 0.132921 (Hartree/Particle) |
| Thermal correction to Energy= | 0.150381                    |

Thermal correction to Enthalpy= 0.151325  
 Thermal correction to Gibbs Free Energy= 0.087069  
 Sum of electronic and zero-point Energies= -1436.953387  
 Sum of electronic and thermal Energies= -1436.935927  
 Sum of electronic and thermal Enthalpies= -1436.934983  
 Sum of electronic and thermal Free Energies= -1436.999240

### 5a...H<sub>2</sub>O

|    |              |              |              |
|----|--------------|--------------|--------------|
| 25 | 0.211946000  | 0.000002000  | 0.015367000  |
| 6  | 1.209122000  | 0.000395000  | 1.510167000  |
| 8  | 1.880815000  | 0.000531000  | 2.463629000  |
| 15 | -1.234098000 | -1.617447000 | 0.730679000  |
| 1  | -1.671504000 | -2.625273000 | -0.164940000 |
| 1  | -0.860419000 | -2.496350000 | 1.783327000  |
| 1  | -2.513337000 | -1.287829000 | 1.241533000  |
| 15 | -1.237879000 | 1.613324000  | 0.732948000  |
| 1  | -2.513827000 | 1.280018000  | 1.249611000  |
| 1  | -0.863000000 | 2.495217000  | 1.782668000  |
| 1  | -1.682381000 | 2.618085000  | -0.162556000 |
| 15 | 1.369703000  | 1.598879000  | -1.075651000 |
| 15 | 1.374106000  | -1.594562000 | -1.077415000 |
| 1  | 0.691417000  | 2.748213000  | -1.562319000 |
| 1  | 2.470366000  | 2.308263000  | -0.518149000 |
| 1  | 2.010200000  | 1.278940000  | -2.303268000 |
| 1  | 2.012142000  | -1.271818000 | -2.305560000 |
| 1  | 2.477916000  | -2.300118000 | -0.521283000 |
| 1  | 0.699436000  | -2.746149000 | -1.563757000 |
| 1  | -0.583372000 | -0.000450000 | -1.399680000 |
| 8  | -3.198266000 | -0.001884000 | -1.336563000 |
| 1  | -3.540200000 | 0.006094000  | -2.238676000 |
| 1  | -2.224671000 | -0.001331000 | -1.437074000 |

E(RB3LYP) = -1666.88760539

Zero-point correction= 0.151951 (Hartree/Particle)  
 Thermal correction to Energy= 0.170125  
 Thermal correction to Enthalpy= 0.171070  
 Thermal correction to Gibbs Free Energy= 0.105322  
 Sum of electronic and zero-point Energies= -1666.735654  
 Sum of electronic and thermal Energies= -1666.717480  
 Sum of electronic and thermal Enthalpies= -1666.716536  
 Sum of electronic and thermal Free Energies= -1666.782283

### 5b...H<sub>2</sub>O

|    |              |              |              |
|----|--------------|--------------|--------------|
| 25 | 0.194727000  | 0.037355000  | -0.081520000 |
| 15 | 1.447081000  | -1.405337000 | -1.276935000 |
| 1  | 1.712049000  | -1.076092000 | -2.628420000 |
| 1  | 2.785521000  | -1.781107000 | -0.954768000 |
| 1  | 0.985864000  | -2.726779000 | -1.522897000 |
| 15 | -0.976966000 | -1.711913000 | 0.864386000  |
| 15 | -1.357024000 | 1.517740000  | 0.687459000  |
| 1  | -1.143053000 | -2.914092000 | 0.130791000  |
| 1  | -0.588409000 | -2.334726000 | 2.085393000  |
| 1  | -2.340824000 | -1.538196000 | 1.201727000  |
| 1  | -2.521135000 | 1.117569000  | 1.389293000  |

|                                              |              |                             |              |
|----------------------------------------------|--------------|-----------------------------|--------------|
| 1                                            | -0.960617000 | 2.535866000                 | 1.600434000  |
| 1                                            | -2.000471000 | 2.377266000                 | -0.232723000 |
| 1                                            | -0.767548000 | -0.237986000                | -1.310146000 |
| 15                                           | 1.638493000  | 0.310946000                 | 1.630890000  |
| 1                                            | 3.039650000  | 0.184562000                 | 1.417600000  |
| 1                                            | 1.725105000  | 1.542452000                 | 2.340405000  |
| 1                                            | 1.612468000  | -0.506753000                | 2.798754000  |
| 6                                            | 0.869210000  | 1.369905000                 | -1.064215000 |
| 8                                            | 1.268410000  | 2.226486000                 | -1.746704000 |
| 8                                            | -3.365494000 | -0.271876000                | -1.158183000 |
| 1                                            | -3.721669000 | 0.158727000                 | -1.944945000 |
| 1                                            | -2.397462000 | -0.262447000                | -1.295103000 |
| E(RB3LYP) = -1666.88697977                   |              |                             |              |
| Zero-point correction=                       |              | 0.151920 (Hartree/Particle) |              |
| Thermal correction to Energy=                |              | 0.170061                    |              |
| Thermal correction to Enthalpy=              |              | 0.171005                    |              |
| Thermal correction to Gibbs Free Energy=     |              | 0.105483                    |              |
| Sum of electronic and zero-point Energies=   |              | -1666.735060                |              |
| Sum of electronic and thermal Energies=      |              | -1666.716919                |              |
| Sum of electronic and thermal Enthalpies=    |              | -1666.715974                |              |
| Sum of electronic and thermal Free Energies= |              | -1666.781497                |              |

## 6...H<sub>2</sub>O

|                                            |              |                             |              |
|--------------------------------------------|--------------|-----------------------------|--------------|
| 25                                         | -0.168287000 | -0.000010000                | -0.035982000 |
| 15                                         | 1.210655000  | 1.603356000                 | 0.790740000  |
| 1                                          | 1.609970000  | 2.690497000                 | -0.031720000 |
| 1                                          | 0.829508000  | 2.407183000                 | 1.907911000  |
| 1                                          | 2.508692000  | 1.291969000                 | 1.269445000  |
| 15                                         | 1.210251000  | -1.603924000                | 0.790275000  |
| 1                                          | 2.508509000  | -1.293022000                | 1.268679000  |
| 1                                          | 0.829119000  | -2.407790000                | 1.907429000  |
| 1                                          | 1.608954000  | -2.691108000                | -0.032428000 |
| 15                                         | -1.222619000 | -1.581289000                | -1.237424000 |
| 15                                         | -1.222163000 | 1.581999000                 | -1.236939000 |
| 1                                          | -0.532648000 | -2.773920000                | -1.592145000 |
| 1                                          | -2.434402000 | -2.245506000                | -0.870746000 |
| 1                                          | -1.649245000 | -1.271606000                | -2.559137000 |
| 1                                          | -1.648618000 | 1.272938000                 | -2.558851000 |
| 1                                          | -2.433927000 | 2.246161000                 | -0.870123000 |
| 1                                          | -0.532003000 | 2.774709000                 | -1.591027000 |
| 1                                          | 0.745304000  | -0.000155000                | -1.358905000 |
| 15                                         | -1.574874000 | -0.000108000                | 1.710572000  |
| 1                                          | -1.591178000 | -1.050043000                | 2.678549000  |
| 1                                          | -1.589572000 | 1.048291000                 | 2.680248000  |
| 1                                          | -2.989202000 | 0.001127000                 | 1.522352000  |
| 8                                          | 3.361027000  | -0.000045000                | -1.213652000 |
| 1                                          | 3.675611000  | 0.000267000                 | -2.125721000 |
| 1                                          | 2.385327000  | 0.000091000                 | -1.293403000 |
| E(RB3LYP) = -1896.68195255                 |              |                             |              |
| Zero-point correction=                     |              | 0.170464 (Hartree/Particle) |              |
| Thermal correction to Energy=              |              | 0.189313                    |              |
| Thermal correction to Enthalpy=            |              | 0.190258                    |              |
| Thermal correction to Gibbs Free Energy=   |              | 0.122385                    |              |
| Sum of electronic and zero-point Energies= |              | -1896.511488                |              |

Sum of electronic and thermal Energies= -1896.492639  
 Sum of electronic and thermal Enthalpies= -1896.491695  
 Sum of electronic and thermal Free Energies= -1896.559568

### 7...H<sub>2</sub>O

|    |              |              |              |
|----|--------------|--------------|--------------|
| 25 | -0.853125000 | -0.000039000 | 0.067682000  |
| 15 | 0.772171000  | -1.640239000 | -0.053517000 |
| 15 | 0.772064000  | 1.640263000  | -0.053078000 |
| 8  | -2.791353000 | -2.105133000 | 0.817754000  |
| 8  | -1.414758000 | -0.000209000 | -2.851164000 |
| 8  | -2.791125000 | 2.105450000  | 0.817234000  |
| 6  | -2.040828000 | -1.286143000 | 0.495682000  |
| 6  | -1.177564000 | -0.000120000 | -1.715857000 |
| 6  | -2.040730000 | 1.286241000  | 0.495405000  |
| 6  | 2.438077000  | -1.291222000 | -0.815224000 |
| 1  | 3.085028000  | -2.152112000 | -0.620785000 |
| 1  | 2.284725000  | -1.241629000 | -1.900235000 |
| 6  | 3.110894000  | 0.000186000  | -0.316641000 |
| 1  | 3.161978000  | 0.000117000  | 0.777929000  |
| 1  | 4.145445000  | 0.000272000  | -0.681594000 |
| 6  | 2.437908000  | 1.291581000  | -0.815041000 |
| 1  | 2.284431000  | 1.242091000  | -1.900040000 |
| 1  | 3.084799000  | 2.152515000  | -0.620581000 |
| 1  | -0.574778000 | 0.000013000  | 1.626871000  |
| 1  | 1.160596000  | 2.253236000  | 1.157273000  |
| 1  | 0.444815000  | 2.820894000  | -0.764142000 |
| 1  | 0.445027000  | -2.820563000 | -0.765130000 |
| 1  | 1.160585000  | -2.253745000 | 1.156606000  |
| 8  | 1.808886000  | -0.000645000 | 2.756516000  |
| 1  | 1.733509000  | 0.001628000  | 3.718320000  |
| 1  | 0.888705000  | -0.000938000 | 2.429733000  |

E(RB3LYP) = -1324.03830043

Zero-point correction= 0.183401 (Hartree/Particle)

Thermal correction to Energy= 0.201736

Thermal correction to Enthalpy= 0.202680

Thermal correction to Gibbs Free Energy= 0.136105

Sum of electronic and zero-point Energies= -1323.854900

Sum of electronic and thermal Energies= -1323.836565

Sum of electronic and thermal Enthalpies= -1323.835620

Sum of electronic and thermal Free Energies= -1323.902196

### 8...H<sub>2</sub>O

|    |              |              |              |
|----|--------------|--------------|--------------|
| 25 | 0.141892000  | -0.265989000 | -0.017953000 |
| 15 | 1.708913000  | 0.293961000  | -1.512634000 |
| 15 | 1.746098000  | 0.087411000  | 1.510663000  |
| 15 | -1.549351000 | -0.176873000 | -1.503552000 |
| 15 | -1.504940000 | -0.243152000 | 1.525102000  |
| 6  | 0.340031000  | -2.043955000 | -0.100992000 |
| 8  | 0.487141000  | -3.201887000 | -0.155807000 |
| 1  | 2.440524000  | -0.646370000 | -2.294095000 |
| 1  | 1.459230000  | 1.201130000  | -2.576241000 |
| 6  | 3.126293000  | 1.181828000  | -0.655597000 |
| 6  | 3.391042000  | 0.494489000  | 0.689573000  |
| 1  | 1.622187000  | 1.161395000  | 2.429977000  |

|   |              |              |              |
|---|--------------|--------------|--------------|
| 1 | 2.195814000  | -0.871839000 | 2.458971000  |
| 1 | -1.693774000 | -1.088112000 | -2.584325000 |
| 1 | -1.794088000 | 0.994904000  | -2.268917000 |
| 6 | -3.212143000 | -0.417691000 | -0.659703000 |
| 6 | -3.151731000 | 0.202570000  | 0.741901000  |
| 1 | -1.500276000 | 0.645186000  | 2.630418000  |
| 1 | -1.861460000 | -1.406129000 | 2.263046000  |
| 1 | 0.052034000  | 1.348654000  | 0.055254000  |
| 1 | 2.791453000  | 2.212517000  | -0.498420000 |
| 1 | 4.022324000  | 1.207643000  | -1.282868000 |
| 1 | 3.898693000  | -0.463701000 | 0.529851000  |
| 1 | 4.026677000  | 1.100475000  | 1.341590000  |
| 1 | -3.368842000 | -1.500915000 | -0.598972000 |
| 1 | -4.026848000 | 0.002938000  | -1.256327000 |
| 1 | -3.156077000 | 1.295020000  | 0.669147000  |
| 1 | -3.990583000 | -0.117719000 | 1.366732000  |
| 8 | -1.822297000 | 3.156571000  | 0.185687000  |
| 1 | -1.094857000 | 2.502226000  | 0.151140000  |
| 1 | -1.859955000 | 3.511297000  | -0.710967000 |

E(RB3LYP) = -1821.76386360

Zero-point correction= 0.232683 (Hartree/Particle)

Thermal correction to Energy= 0.251707

Thermal correction to Enthalpy= 0.252651

Thermal correction to Gibbs Free Energy= 0.185195

Sum of electronic and zero-point Energies= -1821.531180

Sum of electronic and thermal Energies= -1821.512157

Sum of electronic and thermal Enthalpies= -1821.511213

Sum of electronic and thermal Free Energies= -1821.578669

## 9...H<sub>2</sub>O

|    |              |              |              |
|----|--------------|--------------|--------------|
| 25 | -0.126295000 | -0.325663000 | -0.050544000 |
| 15 | 1.557714000  | 0.166513000  | -1.475548000 |
| 15 | 1.535719000  | -0.659204000 | 1.437697000  |
| 15 | -1.706056000 | 0.508793000  | -1.422831000 |
| 15 | -1.733783000 | -0.245055000 | 1.511017000  |
| 7  | -0.318310000 | -2.098079000 | -0.544450000 |
| 7  | -0.443508000 | -3.177966000 | -0.844374000 |
| 1  | 2.036528000  | -0.774258000 | -2.433582000 |
| 1  | 1.523081000  | 1.279373000  | -2.353591000 |
| 6  | 3.132532000  | 0.536581000  | -0.526041000 |
| 6  | 3.236038000  | -0.438960000 | 0.653835000  |
| 1  | 1.640747000  | 0.180939000  | 2.577877000  |
| 1  | 1.767355000  | -1.877508000 | 2.137801000  |
| 1  | -2.191768000 | -0.120626000 | -2.604486000 |
| 1  | -1.512124000 | 1.788322000  | -2.003618000 |
| 6  | -3.345327000 | 0.752029000  | -0.523522000 |
| 6  | -3.080743000 | 0.950887000  | 0.974409000  |
| 1  | -1.493876000 | 0.233252000  | 2.826380000  |
| 1  | -2.535076000 | -1.358620000 | 1.905895000  |
| 1  | -0.018172000 | 1.215734000  | 0.399642000  |
| 1  | 3.017636000  | 1.566488000  | -0.171966000 |
| 1  | 4.012639000  | 0.483778000  | -1.173843000 |
| 1  | 3.540422000  | -1.432382000 | 0.304146000  |

|   |              |              |              |
|---|--------------|--------------|--------------|
| 1 | 3.974929000  | -0.111382000 | 1.391004000  |
| 1 | -3.923352000 | -0.165219000 | -0.684772000 |
| 1 | -3.918184000 | 1.579829000  | -0.951296000 |
| 1 | -2.688802000 | 1.955586000  | 1.163125000  |
| 1 | -3.991461000 | 0.824520000  | 1.567479000  |
| 8 | 1.526943000  | 3.306403000  | 0.395604000  |
| 1 | 0.905887000  | 2.550926000  | 0.355600000  |
| 1 | 1.669252000  | 3.434988000  | 1.341633000  |

E(RB3LYP) = -1817.93929065

|                                              |                             |
|----------------------------------------------|-----------------------------|
| Zero-point correction=                       | 0.232225 (Hartree/Particle) |
| Thermal correction to Energy=                | 0.251528                    |
| Thermal correction to Enthalpy=              | 0.252472                    |
| Thermal correction to Gibbs Free Energy=     | 0.183710                    |
| Sum of electronic and zero-point Energies=   | -1817.707066                |
| Sum of electronic and thermal Energies=      | -1817.687763                |
| Sum of electronic and thermal Enthalpies=    | -1817.686818                |
| Sum of electronic and thermal Free Energies= | -1817.755581                |

### 10...H<sub>2</sub>O

|    |              |              |              |
|----|--------------|--------------|--------------|
| 25 | 0.211875000  | 0.000002000  | 0.019379000  |
| 15 | -1.240855000 | -1.612738000 | 0.740990000  |
| 1  | -1.547645000 | -2.714037000 | -0.098149000 |
| 1  | -0.946102000 | -2.380511000 | 1.903334000  |
| 1  | -2.577557000 | -1.299144000 | 1.088345000  |
| 15 | -1.240148000 | 1.613543000  | 0.740574000  |
| 1  | -2.576986000 | 1.300588000  | 1.087980000  |
| 1  | -0.945155000 | 2.381572000  | 1.902693000  |
| 1  | -1.546476000 | 2.714702000  | -0.098915000 |
| 15 | 1.392599000  | 1.597329000  | -1.060627000 |
| 15 | 1.391798000  | -1.598064000 | -1.060422000 |
| 1  | 0.733804000  | 2.770244000  | -1.516853000 |
| 1  | 2.516582000  | 2.273559000  | -0.501784000 |
| 1  | 2.013247000  | 1.288404000  | -2.301018000 |
| 1  | 2.012502000  | -1.289634000 | -2.300906000 |
| 1  | 2.515517000  | -2.274688000 | -0.501521000 |
| 1  | 0.732456000  | -2.770772000 | -1.516388000 |
| 1  | -0.586088000 | 0.000114000  | -1.380603000 |
| 8  | -3.195468000 | 0.000121000  | -1.422162000 |
| 1  | -3.478868000 | 0.000039000  | -2.344433000 |
| 1  | -2.217508000 | 0.000187000  | -1.464075000 |
| 7  | 1.227831000  | -0.000203000 | 1.571283000  |
| 7  | 1.859919000  | -0.000181000 | 2.504060000  |

E(RB3LYP) = -1663.06490865

|                                              |                             |
|----------------------------------------------|-----------------------------|
| Zero-point correction=                       | 0.151878 (Hartree/Particle) |
| Thermal correction to Energy=                | 0.170090                    |
| Thermal correction to Enthalpy=              | 0.171035                    |
| Thermal correction to Gibbs Free Energy=     | 0.105153                    |
| Sum of electronic and zero-point Energies=   | -1662.913030                |
| Sum of electronic and thermal Energies=      | -1662.894818                |
| Sum of electronic and thermal Enthalpies=    | -1662.893874                |
| Sum of electronic and thermal Free Energies= | -1662.959756                |

### 11...H<sub>2</sub>O

|    |              |             |              |
|----|--------------|-------------|--------------|
| 75 | -0.170555000 | 0.002891000 | -0.057318000 |
|----|--------------|-------------|--------------|

S71

|   |              |              |              |
|---|--------------|--------------|--------------|
| 6 | -1.061880000 | -0.014272000 | 1.726337000  |
| 8 | -1.583935000 | -0.023121000 | 2.754251000  |
| 6 | 1.201157000  | 1.372396000  | 0.452187000  |
| 8 | 1.984251000  | 2.176203000  | 0.696527000  |
| 6 | 1.126574000  | -1.464584000 | 0.414189000  |
| 8 | 1.852419000  | -2.318256000 | 0.652427000  |
| 1 | 0.584096000  | 0.012565000  | -1.619975000 |
| 6 | -1.319824000 | 1.455351000  | -0.807992000 |
| 8 | -1.953007000 | 2.287256000  | -1.284824000 |
| 6 | -1.381278000 | -1.362900000 | -0.879698000 |
| 8 | -2.045942000 | -2.141207000 | -1.400742000 |
| 8 | 3.514480000  | -0.090433000 | -1.018617000 |
| 1 | 2.746374000  | -0.047467000 | -1.604396000 |
| 1 | 3.926535000  | 0.778601000  | -1.099122000 |

E(RB3LYP) = -722.906662431

|                                              |                             |
|----------------------------------------------|-----------------------------|
| Zero-point correction=                       | 0.072787 (Hartree/Particle) |
| Thermal correction to Energy=                | 0.088917                    |
| Thermal correction to Enthalpy=              | 0.089861                    |
| Thermal correction to Gibbs Free Energy=     | 0.026587                    |
| Sum of electronic and zero-point Energies=   | -722.833876                 |
| Sum of electronic and thermal Energies=      | -722.817746                 |
| Sum of electronic and thermal Enthalpies=    | -722.816801                 |
| Sum of electronic and thermal Free Energies= | -722.880075                 |

## 12...H<sub>2</sub>O

|    |              |              |              |
|----|--------------|--------------|--------------|
| 75 | -0.158729000 | -0.002927000 | -0.031261000 |
| 15 | -1.775997000 | 1.549467000  | -0.887636000 |
| 15 | 1.653470000  | -1.529186000 | 0.473834000  |
| 6  | -1.055089000 | -0.286471000 | 1.689709000  |
| 8  | -1.605595000 | -0.446274000 | 2.700405000  |
| 6  | -1.096243000 | -1.489731000 | -0.954187000 |
| 8  | -1.612618000 | -2.344632000 | -1.535117000 |
| 6  | 0.962339000  | 1.498267000  | 0.594952000  |
| 8  | 1.660328000  | 2.370010000  | 0.902473000  |
| 1  | -1.340705000 | 2.846474000  | -1.242984000 |
| 1  | -2.433194000 | 1.229755000  | -2.097266000 |
| 1  | -2.920768000 | 1.932647000  | -0.146418000 |
| 1  | 2.746761000  | -1.084467000 | 1.242205000  |
| 1  | 2.357072000  | -2.150594000 | -0.575431000 |
| 1  | 1.329783000  | -2.685542000 | 1.223566000  |
| 1  | 0.569336000  | 0.255022000  | -1.603739000 |
| 8  | 3.381955000  | 0.371869000  | -1.292416000 |
| 1  | 2.452476000  | 0.408089000  | -1.573267000 |
| 1  | 3.523201000  | 1.223789000  | -0.860692000 |

E(RB3LYP) = -1182.53855780

|                                              |                             |
|----------------------------------------------|-----------------------------|
| Zero-point correction=                       | 0.113682 (Hartree/Particle) |
| Thermal correction to Energy=                | 0.130515                    |
| Thermal correction to Enthalpy=              | 0.131459                    |
| Thermal correction to Gibbs Free Energy=     | 0.067258                    |
| Sum of electronic and zero-point Energies=   | -1182.424876                |
| Sum of electronic and thermal Energies=      | -1182.408043                |
| Sum of electronic and thermal Enthalpies=    | -1182.407099                |
| Sum of electronic and thermal Free Energies= | -1182.471300                |



**13...H<sub>2</sub>O**

|    |              |              |              |
|----|--------------|--------------|--------------|
| 75 | 0.221070000  | 0.000213000  | -0.092575000 |
| 15 | -1.380303000 | 1.748798000  | 0.612258000  |
| 15 | -1.375157000 | -1.753994000 | 0.608881000  |
| 6  | 1.165726000  | -0.000452000 | 1.630991000  |
| 8  | 1.728466000  | -0.001392000 | 2.646727000  |
| 6  | 1.337304000  | 1.384727000  | -0.872503000 |
| 8  | 1.985307000  | 2.210591000  | -1.362949000 |
| 6  | 1.341739000  | -1.379104000 | -0.875218000 |
| 8  | 1.992724000  | -2.201632000 | -1.367330000 |
| 1  | -1.919919000 | 2.609426000  | -0.364024000 |
| 1  | -2.580461000 | 1.393071000  | 1.263242000  |
| 1  | -0.938402000 | 2.734244000  | 1.526370000  |
| 1  | -1.912004000 | -2.614877000 | -0.368756000 |
| 1  | -2.576801000 | -1.402326000 | 1.259461000  |
| 1  | -0.931632000 | -2.739489000 | 1.522147000  |
| 1  | -0.659988000 | 0.000630000  | -1.602067000 |
| 8  | -3.282385000 | -0.001432000 | -1.212803000 |
| 1  | -2.359888000 | -0.000558000 | -1.532281000 |
| 1  | -3.830768000 | 0.001762000  | -2.006812000 |

E(RB3LYP) = -1182.54372112

Zero-point correction= 0.113731 (Hartree/Particle)

Thermal correction to Energy= 0.130463

Thermal correction to Enthalpy= 0.131407

Thermal correction to Gibbs Free Energy= 0.067938

Sum of electronic and zero-point Energies= -1182.429991

Sum of electronic and thermal Energies= -1182.413258

Sum of electronic and thermal Enthalpies= -1182.412314

Sum of electronic and thermal Free Energies= -1182.475783

**14...H<sub>2</sub>O**

|    |              |              |              |
|----|--------------|--------------|--------------|
| 75 | 0.144668000  | 0.000002000  | -0.007882000 |
| 6  | 1.145889000  | -0.000153000 | 1.643340000  |
| 8  | 1.773216000  | -0.000246000 | 2.632127000  |
| 15 | -1.392053000 | 1.677401000  | 0.710594000  |
| 1  | -2.712732000 | 1.322290000  | 1.077468000  |
| 1  | -1.103063000 | 2.488093000  | 1.839488000  |
| 1  | -1.735594000 | 2.734058000  | -0.170293000 |
| 15 | 1.448185000  | 1.674015000  | -1.064252000 |
| 1  | 0.815301000  | 2.834607000  | -1.583332000 |
| 1  | 2.511844000  | 2.351766000  | -0.410840000 |
| 1  | 2.167857000  | 1.350010000  | -2.246792000 |
| 15 | 1.446638000  | -1.675558000 | -1.063661000 |
| 15 | -1.393461000 | -1.675807000 | 0.711409000  |
| 1  | 2.166643000  | -1.352621000 | -2.246291000 |
| 1  | 2.509651000  | -2.354095000 | -0.410011000 |
| 1  | 0.812668000  | -2.835715000 | -1.582380000 |
| 1  | -1.737825000 | -2.732654000 | -0.168916000 |
| 1  | -1.104984000 | -2.486101000 | 1.840718000  |
| 1  | -2.713830000 | -1.319467000 | 1.078152000  |
| 1  | -0.680596000 | 0.000054000  | -1.574099000 |
| 8  | -3.338061000 | 0.000280000  | -1.417774000 |
| 1  | -2.365070000 | 0.000580000  | -1.516667000 |
| 1  | -3.676573000 | -0.001099000 | -2.321270000 |

E(RB3LYP) = -1642.14717911  
 Zero-point correction= 0.152768 (Hartree/Particle)  
 Thermal correction to Energy= 0.170790  
 Thermal correction to Enthalpy= 0.171735  
 Thermal correction to Gibbs Free Energy= 0.105660  
 Sum of electronic and zero-point Energies= -1641.994411  
 Sum of electronic and thermal Energies= -1641.976389  
 Sum of electronic and thermal Enthalpies= -1641.975445  
 Sum of electronic and thermal Free Energies= -1642.041519

### 15...H<sub>2</sub>O

|    |              |              |              |
|----|--------------|--------------|--------------|
| 75 | 0.140919000  | 0.000158000  | -0.011984000 |
| 7  | 1.168736000  | -0.022479000 | 1.697734000  |
| 7  | 1.765457000  | -0.037541000 | 2.657050000  |
| 15 | -1.288289000 | 1.772443000  | 0.667619000  |
| 1  | -2.666510000 | 1.526961000  | 0.883029000  |
| 1  | -1.047782000 | 2.497936000  | 1.868294000  |
| 1  | -1.445529000 | 2.902475000  | -0.176238000 |
| 15 | 1.549555000  | 1.569305000  | -1.080831000 |
| 1  | 1.005162000  | 2.788780000  | -1.565558000 |
| 1  | 2.683609000  | 2.147996000  | -0.442661000 |
| 1  | 2.214310000  | 1.206462000  | -2.283605000 |
| 15 | 1.356212000  | -1.765113000 | -1.003555000 |
| 15 | -1.472094000 | -1.563035000 | 0.771531000  |
| 1  | 2.060532000  | -1.533636000 | -2.216580000 |
| 1  | 2.415807000  | -2.442740000 | -0.335231000 |
| 1  | 0.677043000  | -2.933584000 | -1.441408000 |
| 1  | -1.793226000 | -2.694540000 | -0.021811000 |
| 1  | -1.255968000 | -2.270314000 | 1.987711000  |
| 1  | -2.800564000 | -1.152842000 | 1.035909000  |
| 1  | -0.675189000 | 0.015865000  | -1.536151000 |
| 8  | -3.335682000 | 0.039987000  | -1.473123000 |
| 1  | -3.616061000 | -0.209126000 | -2.362190000 |
| 1  | -2.359215000 | 0.034704000  | -1.514692000 |

E(RB3LYP) = -1638.31332487  
 Zero-point correction= 0.152492 (Hartree/Particle)  
 Thermal correction to Energy= 0.170718  
 Thermal correction to Enthalpy= 0.171662  
 Thermal correction to Gibbs Free Energy= 0.105129  
 Sum of electronic and zero-point Energies= -1638.160833  
 Sum of electronic and thermal Energies= -1638.142607  
 Sum of electronic and thermal Enthalpies= -1638.141663  
 Sum of electronic and thermal Free Energies= -1638.208196

### 16...H<sub>2</sub>O

|    |              |              |              |
|----|--------------|--------------|--------------|
| 75 | -0.179658000 | 0.041551000  | -0.049279000 |
| 15 | 1.408560000  | 1.752155000  | 0.508362000  |
| 15 | -1.546242000 | -1.659189000 | -1.015536000 |
| 15 | 1.380698000  | -1.670122000 | 0.789084000  |
| 8  | -1.922118000 | 2.195752000  | -1.422809000 |
| 8  | -1.723609000 | 0.192587000  | 2.649943000  |
| 6  | -1.274434000 | 1.386245000  | -0.893829000 |
| 6  | -1.138202000 | 0.147108000  | 1.642334000  |
| 1  | 1.940734000  | 2.557596000  | -0.522013000 |
| 1  | 2.627644000  | 1.424435000  | 1.145895000  |

|                                              |              |                             |              |
|----------------------------------------------|--------------|-----------------------------|--------------|
| 1                                            | 1.012266000  | 2.797677000                 | 1.378118000  |
| 1                                            | -0.973090000 | -2.909766000                | -1.361394000 |
| 1                                            | -2.147816000 | -1.392478000                | -2.267426000 |
| 1                                            | -2.698472000 | -2.176118000                | -0.369584000 |
| 1                                            | 1.049246000  | -2.433338000                | 1.936259000  |
| 1                                            | 2.686365000  | -1.296895000                | 1.176666000  |
| 1                                            | 1.734884000  | -2.751097000                | -0.050551000 |
| 1                                            | 0.664485000  | -0.144068000                | -1.582202000 |
| 8                                            | 3.309224000  | -0.157833000                | -1.327209000 |
| 1                                            | 3.747704000  | -0.040943000                | -2.178723000 |
| 1                                            | 2.353021000  | -0.138191000                | -1.528196000 |
| E(RB3LYP) = -1412.34822211                   |              |                             |              |
| Zero-point correction=                       |              | 0.133373 (Hartree/Particle) |              |
| Thermal correction to Energy=                |              | 0.150803                    |              |
| Thermal correction to Enthalpy=              |              | 0.151748                    |              |
| Thermal correction to Gibbs Free Energy=     |              | 0.086774                    |              |
| Sum of electronic and zero-point Energies=   |              | -1412.214850                |              |
| Sum of electronic and thermal Energies=      |              | -1412.197419                |              |
| Sum of electronic and thermal Enthalpies=    |              | -1412.196475                |              |
| Sum of electronic and thermal Free Energies= |              | -1412.261448                |              |

### 17...H<sub>2</sub>O

|                                              |              |              |              |
|----------------------------------------------|--------------|--------------|--------------|
| 75                                           | -0.131538000 | -0.028525000 | -0.090574000 |
| 15                                           | 1.176409000  | 1.650453000  | 0.972404000  |
| 15                                           | -1.486050000 | 1.626639000  | -1.105081000 |
| 15                                           | 1.454795000  | -1.686849000 | 0.535570000  |
| 15                                           | -1.517854000 | -0.361365000 | 1.819774000  |
| 7                                            | -1.070615000 | -1.397154000 | -1.172598000 |
| 7                                            | -1.580673000 | -2.161714000 | -1.826340000 |
| 1                                            | 1.395239000  | 2.886488000  | 0.310709000  |
| 1                                            | 0.794520000  | 2.208181000  | 2.226772000  |
| 1                                            | 2.529545000  | 1.393267000  | 1.302933000  |
| 1                                            | -2.023593000 | 1.337941000  | -2.386499000 |
| 1                                            | -2.691360000 | 2.144364000  | -0.547881000 |
| 1                                            | -0.923571000 | 2.887376000  | -1.436677000 |
| 1                                            | 1.886056000  | -2.616540000 | -0.442983000 |
| 1                                            | 1.163095000  | -2.644348000 | 1.549727000  |
| 1                                            | 2.733720000  | -1.311801000 | 1.009627000  |
| 1                                            | -1.462977000 | 0.541029000  | 2.922385000  |
| 1                                            | -2.939749000 | -0.362656000 | 1.727867000  |
| 1                                            | -1.443719000 | -1.541225000 | 2.619227000  |
| 1                                            | 0.830145000  | 0.250473000  | -1.483411000 |
| 8                                            | 3.476311000  | 0.356819000  | -1.190418000 |
| 1                                            | 3.847285000  | 0.275342000  | -2.077457000 |
| 1                                            | 2.509720000  | 0.315793000  | -1.325374000 |
| E(RB3LYP) = -1638.31099454                   |              |              |              |
| Zero-point correction=                       |              | 0.152324     |              |
| Thermal correction to Energy=                |              | 0.170732     |              |
| Thermal correction to Enthalpy=              |              | 0.171676     |              |
| Thermal correction to Gibbs Free Energy=     |              | 0.104162     |              |
| Sum of electronic and zero-point Energies=   |              | -1638.158670 |              |
| Sum of electronic and thermal Energies=      |              | -1638.140263 |              |
| Sum of electronic and thermal Enthalpies=    |              | -1638.139318 |              |
| Sum of electronic and thermal Free Energies= |              | -1638.206832 |              |

**18...H<sub>2</sub>O**

|    |              |              |              |
|----|--------------|--------------|--------------|
| 26 | 0.132656000  | 0.007585000  | -0.208838000 |
| 15 | -1.527450000 | 1.262118000  | 0.736916000  |
| 1  | -2.454071000 | 1.978790000  | -0.044214000 |
| 1  | -2.405824000 | 0.630581000  | 1.635863000  |
| 1  | -1.033638000 | 2.291803000  | 1.562103000  |
| 6  | -0.739355000 | -1.510790000 | 0.235935000  |
| 8  | -1.321354000 | -2.474810000 | 0.467439000  |
| 1  | -0.547998000 | -0.115784000 | -1.553736000 |
| 15 | 1.952275000  | -1.183676000 | -0.851504000 |
| 6  | 0.836944000  | 1.515296000  | -0.923805000 |
| 1  | 2.070948000  | -1.722494000 | -2.155566000 |
| 1  | 3.194710000  | -0.526480000 | -0.761761000 |
| 1  | 2.247467000  | -2.337720000 | -0.099794000 |
| 8  | 1.250805000  | 2.461411000  | -1.425803000 |
| 17 | 1.295792000  | 0.160167000  | 1.878907000  |
| 8  | -3.365683000 | -0.330355000 | -1.131216000 |
| 1  | -2.509810000 | -0.305190000 | -1.585760000 |
| 1  | -3.507367000 | -1.267191000 | -0.946092000 |

E(RB3LYP) = -1573.68438956

|                                              |              |
|----------------------------------------------|--------------|
| Zero-point correction=                       | 0.106907     |
| Thermal correction to Energy=                | 0.123299     |
| Thermal correction to Enthalpy=              | 0.124243     |
| Thermal correction to Gibbs Free Energy=     | 0.062317     |
| Sum of electronic and zero-point Energies=   | -1573.577483 |
| Sum of electronic and thermal Energies=      | -1573.561091 |
| Sum of electronic and thermal Enthalpies=    | -1573.560147 |
| Sum of electronic and thermal Free Energies= | -1573.622073 |

**19...H<sub>2</sub>O**

|    |              |              |              |
|----|--------------|--------------|--------------|
| 26 | 0.249697000  | -0.023467000 | -0.038108000 |
| 15 | -1.504194000 | -1.075118000 | 0.954736000  |
| 1  | -2.384818000 | -0.296267000 | 1.728698000  |
| 1  | -2.435556000 | -1.895383000 | 0.289703000  |
| 1  | -1.041352000 | -1.965036000 | 1.944882000  |
| 6  | 0.862722000  | -1.596682000 | -0.674192000 |
| 8  | 1.196548000  | -2.568708000 | -1.191692000 |
| 1  | -0.273827000 | 0.026977000  | -1.484021000 |
| 15 | 2.262558000  | 0.954812000  | -0.271464000 |
| 6  | -0.591731000 | 1.562490000  | 0.019384000  |
| 1  | 2.826164000  | 1.455619000  | -1.472136000 |
| 1  | 2.451124000  | 2.078118000  | 0.554152000  |
| 1  | 3.334488000  | 0.156643000  | 0.167786000  |
| 8  | -1.173607000 | 2.553795000  | -0.066934000 |
| 9  | 0.991401000  | -0.029960000 | 1.727302000  |
| 8  | -3.188569000 | 0.262785000  | -1.221983000 |
| 1  | -2.322356000 | 0.124015000  | -1.633981000 |
| 1  | -3.245005000 | 1.221870000  | -1.125352000 |

E(RB3LYP) = -1213.29493421

|                                            |                             |
|--------------------------------------------|-----------------------------|
| Zero-point correction=                     | 0.107421 (Hartree/Particle) |
| Thermal correction to Energy=              | 0.123372                    |
| Thermal correction to Enthalpy=            | 0.124316                    |
| Thermal correction to Gibbs Free Energy=   | 0.063919                    |
| Sum of electronic and zero-point Energies= | -1213.187513                |
| Sum of electronic and thermal Energies=    | -1213.171563                |

Sum of electronic and thermal Enthalpies= -1213.170619  
 Sum of electronic and thermal Free Energies= -1213.231015

**20...H<sub>2</sub>O**

|    |              |              |              |
|----|--------------|--------------|--------------|
| 26 | -0.062056000 | -0.415896000 | -0.000795000 |
| 15 | 1.364733000  | -1.213659000 | 1.523458000  |
| 15 | 1.410284000  | -1.171152000 | -1.514777000 |
| 15 | -1.620573000 | 0.160552000  | -1.525261000 |
| 15 | -1.615513000 | 0.223982000  | 1.511332000  |
| 7  | 0.764748000  | 1.457074000  | -0.002649000 |
| 1  | 2.190855000  | -0.344909000 | 2.280999000  |
| 1  | 0.944711000  | -2.052155000 | 2.584873000  |
| 1  | 1.101039000  | -2.333699000 | -2.264991000 |
| 1  | 1.927646000  | -0.396374000 | -2.581624000 |
| 6  | 2.996072000  | -1.693172000 | -0.664817000 |
| 6  | 2.645258000  | -2.306636000 | 0.697690000  |
| 1  | -2.072620000 | -0.719806000 | -2.538132000 |
| 1  | -1.372737000 | 1.287883000  | -2.345508000 |
| 1  | -2.394998000 | -0.747279000 | 2.182833000  |
| 1  | -1.307179000 | 1.034366000  | 2.629593000  |
| 6  | -3.235973000 | 0.624330000  | -0.699770000 |
| 6  | -2.925057000 | 1.255196000  | 0.664716000  |
| 6  | 1.094119000  | 2.214983000  | 1.095730000  |
| 6  | 1.661601000  | 3.424612000  | 0.710280000  |
| 6  | 1.687847000  | 3.416088000  | -0.705080000 |
| 6  | 1.133203000  | 2.202545000  | -1.096908000 |
| 1  | 3.581434000  | -2.378807000 | -1.284168000 |
| 1  | 3.581093000  | -0.776725000 | -0.530468000 |
| 1  | 3.530626000  | -2.431074000 | 1.327708000  |
| 1  | 2.183599000  | -3.291451000 | 0.567752000  |
| 1  | -3.826673000 | 1.292598000  | -1.332710000 |
| 1  | -3.777147000 | -0.316930000 | -0.565688000 |
| 1  | -3.823409000 | 1.345024000  | 1.282160000  |
| 1  | -2.489167000 | 2.252909000  | 0.545638000  |
| 1  | 0.917559000  | 1.848895000  | 2.099408000  |
| 1  | 2.010551000  | 4.209451000  | 1.370173000  |
| 1  | 2.061437000  | 4.192882000  | -1.360995000 |
| 1  | 0.977405000  | 1.832571000  | -2.102414000 |
| 1  | -0.616483000 | -1.876498000 | 0.007970000  |
| 8  | -3.136820000 | -2.533382000 | 0.076816000  |
| 1  | -2.181249000 | -2.314338000 | 0.073800000  |
| 1  | -3.217896000 | -3.259232000 | -0.553832000 |

E(RB3LYP) = -1937.51354699

Zero-point correction= 0.296301 (Hartree/Particle)

Thermal correction to Energy= 0.318134

Thermal correction to Enthalpy= 0.319078

Thermal correction to Gibbs Free Energy= 0.245044

Sum of electronic and zero-point Energies= -1937.217246

Sum of electronic and thermal Energies= -1937.195413

Sum of electronic and thermal Enthalpies= -1937.194469

Sum of electronic and thermal Free Energies= -1937.268503

**21...H<sub>2</sub>O**

|    |             |             |              |
|----|-------------|-------------|--------------|
| 26 | 0.133489000 | 0.013834000 | -0.052371000 |
|----|-------------|-------------|--------------|

|    |              |              |              |
|----|--------------|--------------|--------------|
| 15 | -1.494970000 | 1.421830000  | 0.574687000  |
| 15 | -1.508394000 | -1.494288000 | -0.290646000 |
| 15 | 1.747499000  | -1.415943000 | -0.595677000 |
| 15 | 1.732139000  | 1.550838000  | 0.052407000  |
| 6  | -2.991238000 | 0.419509000  | 1.076306000  |
| 1  | -2.763926000 | 0.028712000  | 2.073383000  |
| 1  | -3.885905000 | 1.044851000  | 1.145992000  |
| 6  | -3.177503000 | -0.724247000 | 0.068909000  |
| 1  | -3.527127000 | -0.331676000 | -0.890152000 |
| 1  | -3.888680000 | -1.472082000 | 0.430783000  |
| 6  | 3.410243000  | -0.647455000 | -0.209087000 |
| 1  | 3.554021000  | -0.773466000 | 0.869242000  |
| 1  | 4.226463000  | -1.162839000 | -0.723432000 |
| 6  | 3.354964000  | 0.843661000  | -0.570839000 |
| 1  | 3.359367000  | 0.974356000  | -1.658612000 |
| 1  | 4.209949000  | 1.392064000  | -0.165565000 |
| 7  | 0.485828000  | -0.769692000 | 2.949518000  |
| 6  | 0.348897000  | -0.475238000 | 1.822463000  |
| 1  | 0.040176000  | 0.405171000  | -1.560289000 |
| 1  | 1.674303000  | 2.766443000  | -0.671430000 |
| 1  | -1.495990000 | -2.616763000 | 0.572121000  |
| 1  | -1.321991000 | 2.256311000  | 1.703645000  |
| 1  | 1.938336000  | -1.850258000 | -1.932358000 |
| 1  | 1.876725000  | -2.678304000 | 0.032033000  |
| 1  | 2.122479000  | 2.095169000  | 1.301909000  |
| 1  | -2.054099000 | 2.381783000  | -0.302362000 |
| 1  | -1.774949000 | -2.182678000 | -1.497974000 |
| 8  | -2.297866000 | 0.773093000  | -2.675374000 |
| 1  | -1.414938000 | 0.661903000  | -2.263081000 |
| 1  | -2.179081000 | 0.470782000  | -3.583916000 |

E(RB3LYP) = -1820.80182859

Zero-point correction= 0.233356 (Hartree/Particle)

Thermal correction to Energy= 0.252680

Thermal correction to Enthalpy= 0.253624

Thermal correction to Gibbs Free Energy= 0.185915

Sum of electronic and zero-point Energies= -1820.568473

Sum of electronic and thermal Energies= -1820.549148

Sum of electronic and thermal Enthalpies= -1820.548204

Sum of electronic and thermal Free Energies= -1820.615913

## 22...H<sub>2</sub>O

|    |              |              |              |
|----|--------------|--------------|--------------|
| 26 | -0.115157000 | -0.026072000 | 0.141998000  |
| 15 | -1.731120000 | -1.567011000 | 0.131258000  |
| 15 | -1.744340000 | 1.448559000  | 0.573249000  |
| 15 | 1.532633000  | 1.508031000  | 0.198480000  |
| 15 | 1.511925000  | -1.475181000 | -0.441507000 |
| 1  | -2.079703000 | -2.202177000 | -1.085772000 |
| 1  | -1.710290000 | -2.717741000 | 0.957477000  |
| 1  | -1.974243000 | 1.938983000  | 1.885174000  |
| 1  | -1.849648000 | 2.680039000  | -0.115986000 |
| 6  | -3.396531000 | 0.662576000  | 0.177472000  |
| 6  | -3.366681000 | -0.800154000 | 0.644661000  |
| 1  | 1.840633000  | 2.302826000  | 1.329199000  |
| 1  | 1.474692000  | 2.542485000  | -0.765375000 |

|    |              |              |              |
|----|--------------|--------------|--------------|
| 1  | 2.109382000  | -2.358627000 | 0.489864000  |
| 1  | 1.311215000  | -2.393479000 | -1.498078000 |
| 6  | 3.193288000  | 0.713333000  | -0.147879000 |
| 6  | 2.984116000  | -0.502566000 | -1.062119000 |
| 1  | -4.228235000 | 1.215867000  | 0.623314000  |
| 1  | -3.493000000 | 0.714145000  | -0.911739000 |
| 1  | -4.214353000 | -1.368697000 | 0.251761000  |
| 1  | -3.409746000 | -0.853068000 | 1.738372000  |
| 1  | 3.895438000  | 1.430949000  | -0.581772000 |
| 1  | 3.567185000  | 0.392353000  | 0.828699000  |
| 1  | 3.881311000  | -1.126122000 | -1.115098000 |
| 1  | 2.719509000  | -0.186291000 | -2.075941000 |
| 1  | 0.009653000  | -0.302574000 | 1.649990000  |
| 17 | -0.452880000 | 0.407779000  | -2.220079000 |
| 8  | 2.380030000  | -0.563119000 | 2.739824000  |
| 1  | 1.485128000  | -0.503416000 | 2.344090000  |
| 1  | 2.296262000  | -0.109983000 | 3.587623000  |

E(RB3LYP) = -2188.18753310

|                                              |                             |
|----------------------------------------------|-----------------------------|
| Zero-point correction=                       | 0.226014 (Hartree/Particle) |
| Thermal correction to Energy=                | 0.244847                    |
| Thermal correction to Enthalpy=              | 0.245791                    |
| Thermal correction to Gibbs Free Energy=     | 0.179206                    |
| Sum of electronic and zero-point Energies=   | -2187.961519                |
| Sum of electronic and thermal Energies=      | -2187.942687                |
| Sum of electronic and thermal Enthalpies=    | -2187.941742                |
| Sum of electronic and thermal Free Energies= | -2188.008327                |

### 23...H<sub>2</sub>O

|    |              |              |              |
|----|--------------|--------------|--------------|
| 44 | -0.093821000 | -0.260052000 | 0.016149000  |
| 15 | 1.081225000  | -1.743742000 | -1.400838000 |
| 15 | -0.799463000 | 1.730941000  | 1.115310000  |
| 8  | 3.459657000  | 2.050340000  | -0.640005000 |
| 8  | 0.271320000  | -1.931820000 | 2.668756000  |
| 8  | -2.905473000 | -1.174093000 | -0.700758000 |
| 7  | 1.841509000  | 0.560378000  | 0.316462000  |
| 6  | 2.628530000  | 1.317093000  | -0.194343000 |
| 6  | 0.136183000  | -1.319888000 | 1.708343000  |
| 6  | -1.833031000 | -0.865056000 | -0.392999000 |
| 1  | 0.419162000  | -2.648261000 | -2.262361000 |
| 1  | 2.011199000  | -2.634873000 | -0.824076000 |
| 1  | 1.921837000  | -1.108016000 | -2.331938000 |
| 1  | -0.559414000 | 2.936429000  | 0.438377000  |
| 1  | -2.123019000 | 1.940814000  | 1.547457000  |
| 1  | -0.104866000 | 1.980784000  | 2.316818000  |
| 1  | -0.173952000 | 0.630033000  | -1.354988000 |
| 8  | -2.669780000 | 2.135287000  | -1.304446000 |
| 1  | -1.877463000 | 1.740594000  | -1.696633000 |
| 1  | -3.338223000 | 1.443529000  | -1.389914000 |

E(RB3LYP) = -1252.05258290

|                                            |                             |
|--------------------------------------------|-----------------------------|
| Zero-point correction=                     | 0.118672 (Hartree/Particle) |
| Thermal correction to Energy=              | 0.137112                    |
| Thermal correction to Enthalpy=            | 0.138056                    |
| Thermal correction to Gibbs Free Energy=   | 0.070053                    |
| Sum of electronic and zero-point Energies= | -1251.933911                |

Sum of electronic and thermal Energies= -1251.915471  
 Sum of electronic and thermal Enthalpies= -1251.914527  
 Sum of electronic and thermal Free Energies= -1251.982530

**24...H<sub>2</sub>O**

|    |              |              |              |
|----|--------------|--------------|--------------|
| 44 | -0.165856000 | -0.057308000 | -0.019234000 |
| 15 | 1.727799000  | -1.538182000 | 0.466190000  |
| 14 | -1.873087000 | 1.514852000  | -0.901153000 |
| 8  | 1.355948000  | 2.517449000  | 0.769676000  |
| 8  | -1.755665000 | -0.431200000 | 2.644417000  |
| 8  | -1.708815000 | -2.174581000 | -1.674308000 |
| 6  | 0.778780000  | 1.553372000  | 0.523695000  |
| 6  | -1.144488000 | -0.313560000 | 1.677930000  |
| 6  | -1.148520000 | -1.411213000 | -1.024810000 |
| 1  | 2.485253000  | -2.075811000 | -0.590987000 |
| 1  | 1.448261000  | -2.745371000 | 1.150792000  |
| 1  | 2.784941000  | -1.088034000 | 1.280166000  |
| 1  | -2.982322000 | 1.773041000  | 0.064735000  |
| 1  | -1.293976000 | 2.848443000  | -1.234015000 |
| 1  | -2.514391000 | 1.014497000  | -2.150452000 |
| 1  | 0.494708000  | 0.255313000  | -1.506692000 |
| 8  | 3.384861000  | 0.519583000  | -1.140345000 |
| 1  | 3.533673000  | 1.418737000  | -0.821948000 |
| 1  | 2.522482000  | 0.563948000  | -1.578413000 |

E(RB3LYP) = -1145.44607879

Zero-point correction= 0.109854 (Hartree/Particle)

Thermal correction to Energy= 0.127478

Thermal correction to Enthalpy= 0.128422

Thermal correction to Gibbs Free Energy= 0.062812

Sum of electronic and zero-point Energies= -1145.336225

Sum of electronic and thermal Energies= -1145.318601

Sum of electronic and thermal Enthalpies= -1145.317657

Sum of electronic and thermal Free Energies= -1145.383267

**25...H<sub>2</sub>O**

|    |              |              |              |
|----|--------------|--------------|--------------|
| 44 | -0.035082000 | 0.141652000  | -0.058023000 |
| 15 | -1.456205000 | 1.800719000  | -0.925427000 |
| 15 | -1.455884000 | -0.429074000 | 1.874589000  |
| 15 | 1.343244000  | -1.776295000 | 0.151865000  |
| 8  | 1.944485000  | 2.005102000  | 1.258764000  |
| 17 | -1.597171000 | -1.415034000 | -1.252283000 |
| 1  | -1.686888000 | 1.711135000  | -2.310829000 |
| 1  | -1.132149000 | 3.175732000  | -0.837953000 |
| 1  | -2.799444000 | 1.881381000  | -0.489301000 |
| 1  | -2.835693000 | -0.136475000 | 1.773198000  |
| 1  | -1.590843000 | -1.796297000 | 2.208441000  |
| 1  | -1.265159000 | 0.061356000  | 3.192279000  |
| 1  | 0.693574000  | -2.927395000 | 0.651054000  |
| 1  | 2.501512000  | -1.800730000 | 0.956016000  |
| 1  | 1.868632000  | -2.307085000 | -1.037995000 |
| 6  | 1.162889000  | 1.294251000  | 0.772711000  |
| 1  | 0.735053000  | 0.373566000  | -1.450751000 |
| 8  | 3.590561000  | 0.091097000  | -1.028810000 |



|                                              |             |                             |              |
|----------------------------------------------|-------------|-----------------------------|--------------|
| 1                                            | 3.741431000 | 0.789110000                 | -0.378473000 |
| 1                                            | 2.740458000 | 0.333246000                 | -1.425171000 |
| E(RB3LYP) = -1774.01721458                   |             |                             |              |
| Zero-point correction=                       |             | 0.126330 (Hartree/Particle) |              |
| Thermal correction to Energy=                |             | 0.143742                    |              |
| Thermal correction to Enthalpy=              |             | 0.144686                    |              |
| Thermal correction to Gibbs Free Energy=     |             | 0.080350                    |              |
| Sum of electronic and zero-point Energies=   |             | -1773.890885                |              |
| Sum of electronic and thermal Energies=      |             | -1773.873472                |              |
| Sum of electronic and thermal Enthalpies=    |             | -1773.872528                |              |
| Sum of electronic and thermal Free Energies= |             | -1773.936864                |              |

### 26...H<sub>2</sub>O

|                                              |              |                             |              |
|----------------------------------------------|--------------|-----------------------------|--------------|
| 44                                           | -0.099228000 | -0.101394000                | -0.049010000 |
| 15                                           | 1.619614000  | 1.513595000                 | -0.108061000 |
| 15                                           | -1.623467000 | -1.712588000                | -0.789228000 |
| 8                                            | 0.692133000  | -1.453529000                | 2.549065000  |
| 6                                            | 0.390438000  | -0.932074000                | 1.556551000  |
| 1                                            | 2.748236000  | 1.506239000                 | 0.734037000  |
| 1                                            | 1.227535000  | 2.864486000                 | 0.059966000  |
| 1                                            | 2.243047000  | 1.635199000                 | -1.361521000 |
| 1                                            | -1.447517000 | -2.053817000                | -2.144336000 |
| 1                                            | -1.712285000 | -3.011585000                | -0.238028000 |
| 1                                            | -3.009463000 | -1.422551000                | -0.836317000 |
| 1                                            | 0.931976000  | -1.034350000                | -0.855846000 |
| 15                                           | -1.808119000 | 1.490946000                 | 0.723906000  |
| 1                                            | -3.078139000 | 1.379708000                 | 0.111407000  |
| 1                                            | -2.268149000 | 1.702515000                 | 2.049245000  |
| 1                                            | -1.584945000 | 2.847859000                 | 0.393299000  |
| 9                                            | -0.656256000 | 0.821601000                 | -1.795490000 |
| 8                                            | 3.629391000  | -0.919455000                | -0.586284000 |
| 1                                            | 3.786063000  | -0.961420000                | -1.538233000 |
| 1                                            | 2.700744000  | -1.188324000                | -0.498627000 |
| E(RB3LYP) = -1413.62632925                   |              |                             |              |
| Zero-point correction=                       |              | 0.126587 (Hartree/Particle) |              |
| Thermal correction to Energy=                |              | 0.143935                    |              |
| Thermal correction to Enthalpy=              |              | 0.144879                    |              |
| Thermal correction to Gibbs Free Energy=     |              | 0.080086                    |              |
| Sum of electronic and zero-point Energies=   |              | -1413.499743                |              |
| Sum of electronic and thermal Energies=      |              | -1413.482394                |              |
| Sum of electronic and thermal Enthalpies=    |              | -1413.481450                |              |
| Sum of electronic and thermal Free Energies= |              | -1413.546244                |              |

### 27...H<sub>2</sub>O

|    |              |              |              |
|----|--------------|--------------|--------------|
| 44 | -0.091901000 | -0.055379000 | -0.053478000 |
| 15 | 1.532264000  | -1.607224000 | 0.763457000  |
| 15 | -1.264968000 | -1.650020000 | -1.263540000 |
| 15 | -1.523750000 | -0.080780000 | 1.835383000  |
| 15 | 1.134296000  | 1.809320000  | 0.631640000  |
| 14 | -1.567103000 | 1.576896000  | -1.127756000 |
| 1  | 2.032984000  | -2.634984000 | -0.075234000 |
| 1  | 1.245601000  | -2.451894000 | 1.872520000  |
| 1  | 2.790570000  | -1.156382000 | 1.230699000  |
| 1  | -1.460875000 | -1.431438000 | -2.644725000 |

|   |              |              |              |
|---|--------------|--------------|--------------|
| 1 | -0.797875000 | -2.989316000 | -1.363997000 |
| 1 | -2.610328000 | -1.979489000 | -0.948082000 |
| 1 | -2.884200000 | -0.446066000 | 1.663312000  |
| 1 | -1.307707000 | -0.884080000 | 2.992473000  |
| 1 | -1.781592000 | 1.121617000  | 2.543815000  |
| 1 | 0.531300000  | 2.748518000  | 1.508918000  |
| 1 | 2.354669000  | 1.666809000  | 1.338436000  |
| 1 | 1.582446000  | 2.728777000  | -0.338336000 |
| 1 | -2.765344000 | 1.999637000  | -0.315983000 |
| 1 | -2.179408000 | 1.127870000  | -2.425067000 |
| 1 | -0.920264000 | 2.887923000  | -1.477657000 |
| 1 | 0.705805000  | 0.098019000  | -1.477282000 |
| 8 | 3.388014000  | 0.269320000  | -1.244419000 |
| 1 | 3.746890000  | 0.548104000  | -2.095749000 |
| 1 | 2.428665000  | 0.182512000  | -1.395192000 |

E(RB3LYP) = -1834.88993224

Zero-point correction= 0.168861 (Hartree/Particle)

Thermal correction to Energy= 0.188162

Thermal correction to Enthalpy= 0.189107

Thermal correction to Gibbs Free Energy= 0.121161

Sum of electronic and zero-point Energies= -1834.721072

Sum of electronic and thermal Energies= -1834.701770

Sum of electronic and thermal Enthalpies= -1834.700826

Sum of electronic and thermal Free Energies= -1834.768772

## 28...H<sub>2</sub>O

|    |              |              |              |
|----|--------------|--------------|--------------|
| 44 | -0.098001000 | 0.137348000  | 0.145532000  |
| 15 | -1.829311000 | -0.812361000 | 1.380385000  |
| 15 | -1.808917000 | 1.372439000  | -0.842020000 |
| 15 | 1.632855000  | 0.987266000  | -1.187634000 |
| 15 | 1.590926000  | -1.252909000 | 0.980764000  |
| 1  | -2.133240000 | -2.174075000 | 1.142359000  |
| 1  | -1.898458000 | -0.836373000 | 2.795732000  |
| 1  | -2.101229000 | 2.712487000  | -0.476446000 |
| 1  | -1.884257000 | 1.535769000  | -2.245345000 |
| 6  | -3.436877000 | 0.516587000  | -0.487165000 |
| 6  | -3.458671000 | 0.028663000  | 0.968044000  |
| 1  | 2.008891000  | 2.350398000  | -1.261257000 |
| 1  | 1.533938000  | 0.729913000  | -2.575439000 |
| 1  | 2.237103000  | -1.012048000 | 2.217371000  |
| 1  | 1.366969000  | -2.640702000 | 1.137023000  |
| 6  | 3.264704000  | 0.187490000  | -0.730103000 |
| 6  | 3.020327000  | -1.241705000 | -0.226854000 |
| 1  | -4.286915000 | 1.170121000  | -0.704995000 |
| 1  | -3.468879000 | -0.334748000 | -1.174647000 |
| 1  | -4.300579000 | -0.645478000 | 1.150500000  |
| 1  | -3.557801000 | 0.876549000  | 1.655302000  |
| 1  | 3.954457000  | 0.199203000  | -1.579098000 |
| 1  | 3.674303000  | 0.809266000  | 0.071489000  |
| 1  | 3.921279000  | -1.662304000 | 0.229788000  |
| 1  | 2.710008000  | -1.895107000 | -1.048710000 |
| 1  | 0.095325000  | 1.261727000  | 1.291652000  |
| 17 | -0.522211000 | -1.648166000 | -1.675983000 |
| 8  | 2.617601000  | 1.949444000  | 1.945043000  |

|                                              |             |                             |             |
|----------------------------------------------|-------------|-----------------------------|-------------|
| 1                                            | 2.547977000 | 2.903602000                 | 2.069601000 |
| 1                                            | 1.709727000 | 1.669020000                 | 1.717111000 |
| E(RB3LYP) = -2158.69977976                   |             |                             |             |
| Zero-point correction=                       |             | 0.225985 (Hartree/Particle) |             |
| Thermal correction to Energy=                |             | 0.245093                    |             |
| Thermal correction to Enthalpy=              |             | 0.246037                    |             |
| Thermal correction to Gibbs Free Energy=     |             | 0.178200                    |             |
| Sum of electronic and zero-point Energies=   |             | -2158.473795                |             |
| Sum of electronic and thermal Energies=      |             | -2158.454687                |             |
| Sum of electronic and thermal Enthalpies=    |             | -2158.453742                |             |
| Sum of electronic and thermal Free Energies= |             | -2158.521580                |             |

### 29...H<sub>2</sub>O

|                                              |              |                             |              |
|----------------------------------------------|--------------|-----------------------------|--------------|
| 44                                           | -0.225987000 | 0.047343000                 | -0.213266000 |
| 17                                           | -0.539348000 | -1.560031000                | 1.771187000  |
| 15                                           | -2.170177000 | -0.564896000                | -1.233692000 |
| 15                                           | -1.208939000 | 1.770071000                 | 0.902602000  |
| 7                                            | 0.939368000  | -1.599259000                | -1.087339000 |
| 1                                            | 0.395691000  | -2.455271000                | -0.997715000 |
| 1                                            | 1.116205000  | -1.435066000                | -2.075262000 |
| 7                                            | 1.723531000  | 0.410495000                 | 0.705199000  |
| 1                                            | 1.963115000  | 1.403604000                 | 0.698988000  |
| 1                                            | 1.606753000  | 0.071977000                 | 1.661428000  |
| 6                                            | 2.211777000  | -1.747761000                | -0.332219000 |
| 1                                            | 2.950538000  | -2.338439000                | -0.888452000 |
| 1                                            | 1.961735000  | -2.273750000                | 0.592640000  |
| 6                                            | 2.764691000  | -0.367549000                | -0.001817000 |
| 1                                            | 3.681004000  | -0.465878000                | 0.595147000  |
| 1                                            | 3.018451000  | 0.179031000                 | -0.915341000 |
| 1                                            | -2.890112000 | 0.302834000                 | -2.097369000 |
| 1                                            | -3.281570000 | -1.009362000                | -0.470379000 |
| 1                                            | -2.141750000 | -1.672500000                | -2.129102000 |
| 1                                            | -1.727510000 | 2.923570000                 | 0.253204000  |
| 1                                            | -2.326732000 | 1.533047000                 | 1.743379000  |
| 1                                            | -0.427424000 | 2.470468000                 | 1.861193000  |
| 1                                            | 0.106052000  | 0.989489000                 | -1.500162000 |
| 8                                            | 1.837690000  | 2.888087000                 | -0.701995000 |
| 1                                            | 1.443605000  | 3.766830000                 | -0.752166000 |
| 1                                            | 1.150403000  | 2.277754000                 | -1.044998000 |
| E(RB3LYP) = -1508.07406696                   |              |                             |              |
| Zero-point correction=                       |              | 0.206250 (Hartree/Particle) |              |
| Thermal correction to Energy=                |              | 0.223147                    |              |
| Thermal correction to Enthalpy=              |              | 0.224091                    |              |
| Thermal correction to Gibbs Free Energy=     |              | 0.161434                    |              |
| Sum of electronic and zero-point Energies=   |              | -1507.867817                |              |
| Sum of electronic and thermal Energies=      |              | -1507.850920                |              |
| Sum of electronic and thermal Enthalpies=    |              | -1507.849976                |              |
| Sum of electronic and thermal Free Energies= |              | -1507.912633                |              |

### 30...H<sub>2</sub>O

|    |              |              |              |
|----|--------------|--------------|--------------|
| 44 | -0.083199000 | -0.205063000 | 0.016054000  |
| 17 | -0.880039000 | 2.243022000  | -0.130766000 |
| 15 | -1.929724000 | -0.704251000 | -1.360245000 |
| 15 | -1.945181000 | -0.556746000 | 1.414295000  |

|    |              |              |              |
|----|--------------|--------------|--------------|
| 15 | 1.716390000  | 0.365683000  | -1.393550000 |
| 15 | 1.695157000  | 0.502703000  | 1.387144000  |
| 1  | 0.323639000  | -1.765588000 | 0.108728000  |
| 6  | -3.192273000 | -0.482595000 | 0.012258000  |
| 1  | -4.023235000 | -1.190584000 | 0.044850000  |
| 1  | -3.572537000 | 0.540034000  | -0.044585000 |
| 6  | 2.906770000  | 0.815167000  | -0.013950000 |
| 1  | 3.720324000  | 0.089408000  | 0.026685000  |
| 1  | 3.297508000  | 1.833324000  | -0.061566000 |
| 1  | -2.252873000 | -1.976495000 | -1.894673000 |
| 1  | -2.419961000 | 0.092904000  | -2.421370000 |
| 1  | -2.270355000 | -1.767105000 | 2.075152000  |
| 1  | -2.448321000 | 0.345843000  | 2.380796000  |
| 1  | 1.645053000  | 1.528884000  | -2.193633000 |
| 1  | 2.487381000  | -0.444623000 | -2.260341000 |
| 1  | 1.631756000  | 1.730693000  | 2.084460000  |
| 1  | 2.448301000  | -0.242123000 | 2.324927000  |
| 8  | 2.957159000  | -2.338393000 | 0.120651000  |
| 1  | 1.993171000  | -2.180081000 | 0.135684000  |
| 1  | 3.067683000  | -3.102233000 | -0.458197000 |

E(RB3LYP) = -2080.02373960

Zero-point correction= 0.166541 (Hartree/Particle)

Thermal correction to Energy= 0.183906

Thermal correction to Enthalpy= 0.184850

Thermal correction to Gibbs Free Energy= 0.120337

Sum of electronic and zero-point Energies= -2079.857198

Sum of electronic and thermal Energies= -2079.839834

Sum of electronic and thermal Enthalpies= -2079.838890

Sum of electronic and thermal Free Energies= -2079.903403

### 31...H<sub>2</sub>O

|    |              |              |              |
|----|--------------|--------------|--------------|
| 42 | -0.201386000 | -0.017952000 | 0.020359000  |
| 15 | 1.876153000  | -1.345670000 | 0.559645000  |
| 15 | -1.976044000 | 1.344440000  | -1.063118000 |
| 7  | -1.065466000 | -0.286318000 | 1.631015000  |
| 8  | -1.679977000 | -0.428578000 | 2.628303000  |
| 6  | 0.784580000  | 1.700734000  | 0.568282000  |
| 8  | 1.379107000  | 2.657091000  | 0.821651000  |
| 1  | 2.533593000  | -2.067705000 | -0.454353000 |
| 1  | 1.685682000  | -2.406021000 | 1.478759000  |
| 1  | 3.002524000  | -0.754868000 | 1.166367000  |
| 1  | -2.575341000 | 0.876024000  | -2.254763000 |
| 1  | -3.168106000 | 1.662728000  | -0.367111000 |
| 1  | -1.671496000 | 2.649126000  | -1.514965000 |
| 1  | 0.491787000  | 0.301870000  | -1.634922000 |
| 8  | 3.221521000  | 0.468926000  | -1.489845000 |
| 1  | 2.276942000  | 0.439245000  | -1.726440000 |
| 1  | 3.344917000  | 1.366680000  | -1.156709000 |
| 6  | -0.956019000 | -1.692835000 | -0.916411000 |
| 8  | -1.355278000 | -2.614664000 | -1.481008000 |

E(RB+HF-LYP) = -1187.52107961

Zero-point correction= 0.111019 (Hartree/Particle)

Thermal correction to Energy= 0.128453

Thermal correction to Enthalpy= 0.129397  
 Thermal correction to Gibbs Free Energy= 0.063881  
 Sum of electronic and zero-point Energies= -1187.410061  
 Sum of electronic and thermal Energies= -1187.392627  
 Sum of electronic and thermal Enthalpies= -1187.391683  
 Sum of electronic and thermal Free Energies= -1187.457199

### 32...H<sub>2</sub>O

|    |              |              |              |
|----|--------------|--------------|--------------|
| 42 | -0.643186000 | 0.011511000  | 0.037543000  |
| 1  | 0.001629000  | 0.513546000  | 1.662287000  |
| 15 | 1.333027000  | 1.286727000  | -0.928580000 |
| 15 | 1.205413000  | -1.707484000 | 0.234067000  |
| 6  | -1.778515000 | 1.683640000  | 0.228449000  |
| 6  | -1.908576000 | -1.042496000 | 1.222696000  |
| 7  | -1.405098000 | -0.539574000 | -1.553558000 |
| 8  | -1.945824000 | -0.903022000 | -2.537633000 |
| 6  | 2.773553000  | 0.119674000  | -1.217712000 |
| 1  | 2.584810000  | -0.369979000 | -2.180045000 |
| 1  | 3.706506000  | 0.683252000  | -1.308524000 |
| 1  | 3.620841000  | -1.676920000 | -0.313699000 |
| 6  | 2.871158000  | -0.913556000 | -0.085795000 |
| 1  | 3.143488000  | -0.412068000 | 0.848869000  |
| 1  | 1.275933000  | 1.960328000  | -2.171073000 |
| 1  | 1.928273000  | 2.311317000  | -0.164179000 |
| 1  | 1.455789000  | -2.403685000 | 1.436860000  |
| 1  | 1.235824000  | -2.823910000 | -0.638169000 |
| 8  | -2.608021000 | -1.635277000 | 1.923429000  |
| 8  | -2.405272000 | 2.643638000  | 0.360241000  |
| 8  | 2.459929000  | 1.196034000  | 2.286996000  |
| 1  | 2.558662000  | 1.321479000  | 3.238439000  |
| 1  | 1.508920000  | 1.006973000  | 2.154926000  |

E(RB3LYP) = -1264.96148132

Zero-point correction= 0.150868 (Hartree/Particle)  
 Thermal correction to Energy= 0.168940  
 Thermal correction to Enthalpy= 0.169884  
 Thermal correction to Gibbs Free Energy= 0.102901  
 Sum of electronic and zero-point Energies= -1264.810614  
 Sum of electronic and thermal Energies= -1264.792541  
 Sum of electronic and thermal Enthalpies= -1264.791597  
 Sum of electronic and thermal Free Energies= -1264.858580

### 33...H<sub>2</sub>O

|    |              |              |              |
|----|--------------|--------------|--------------|
| 42 | -0.163398000 | 0.050645000  | 0.048431000  |
| 15 | 1.865435000  | -1.274071000 | 0.723333000  |
| 15 | -1.175620000 | -2.074462000 | -0.873824000 |
| 15 | -1.898793000 | 1.356954000  | -1.130375000 |
| 7  | -0.983209000 | 0.038185000  | 1.694097000  |
| 8  | -1.573995000 | 0.050663000  | 2.721123000  |
| 6  | 0.873242000  | 1.736482000  | 0.373340000  |
| 8  | 1.509042000  | 2.694633000  | 0.527836000  |
| 1  | 2.444078000  | -2.211877000 | -0.158176000 |
| 1  | 1.695405000  | -2.138568000 | 1.834847000  |
| 1  | 3.052953000  | -0.647529000 | 1.152700000  |
| 1  | -2.020495000 | -2.912327000 | -0.101809000 |

|                                              |              |                             |              |
|----------------------------------------------|--------------|-----------------------------|--------------|
| 1                                            | -2.014070000 | -2.000920000                | -2.014590000 |
| 1                                            | -0.331019000 | -3.099649000                | -1.365376000 |
| 1                                            | -2.679279000 | 0.764369000                 | -2.157542000 |
| 1                                            | -2.973969000 | 1.943028000                 | -0.416121000 |
| 1                                            | -1.516814000 | 2.508059000                 | -1.857612000 |
| 1                                            | 0.473625000  | 0.065487000                 | -1.670953000 |
| 8                                            | 3.184144000  | 0.194936000                 | -1.630307000 |
| 1                                            | 2.222395000  | 0.170888000                 | -1.792981000 |
| 1                                            | 3.334064000  | 1.097605000                 | -1.321448000 |
| E(RB+HF-LYP) = -1417.33587737                |              |                             |              |
| Zero-point correction=                       |              | 0.130727 (Hartree/Particle) |              |
| Thermal correction to Energy=                |              | 0.148730                    |              |
| Thermal correction to Enthalpy=              |              | 0.149674                    |              |
| Thermal correction to Gibbs Free Energy=     |              | 0.083300                    |              |
| Sum of electronic and zero-point Energies=   |              | -1417.205150                |              |
| Sum of electronic and thermal Energies=      |              | -1417.187148                |              |
| Sum of electronic and thermal Enthalpies=    |              | -1417.186204                |              |
| Sum of electronic and thermal Free Energies= |              | -1417.252578                |              |

### 34...H<sub>2</sub>O

|                               |              |              |              |
|-------------------------------|--------------|--------------|--------------|
| 42                            | 0.135210000  | -0.252122000 | -0.005536000 |
| 15                            | 1.947531000  | 0.294078000  | -1.565050000 |
| 15                            | 1.909161000  | 0.253051000  | 1.601819000  |
| 15                            | -1.765184000 | -0.229458000 | 1.571607000  |
| 15                            | -1.747384000 | -0.053876000 | -1.588584000 |
| 6                             | 3.573919000  | 0.569176000  | -0.643897000 |
| 1                             | 4.035496000  | -0.420578000 | -0.547056000 |
| 1                             | 4.255242000  | 1.195016000  | -1.227992000 |
| 6                             | 3.316878000  | 1.167946000  | 0.744984000  |
| 1                             | 2.989793000  | 2.209670000  | 0.657794000  |
| 1                             | 4.222609000  | 1.149451000  | 1.358728000  |
| 6                             | -3.397592000 | -0.447985000 | 0.656709000  |
| 1                             | -3.516867000 | -1.526882000 | 0.502591000  |
| 1                             | -4.234110000 | -0.104665000 | 1.272571000  |
| 6                             | -3.363068000 | 0.292177000  | -0.687455000 |
| 1                             | -3.371096000 | 1.374268000  | -0.519022000 |
| 1                             | -4.218893000 | 0.020535000  | -1.312800000 |
| 8                             | 0.522962000  | -3.245880000 | -0.117086000 |
| 7                             | 0.337602000  | -2.067001000 | -0.073100000 |
| 1                             | 0.086541000  | 1.592244000  | 0.069618000  |
| 1                             | -1.834649000 | 0.911387000  | -2.623217000 |
| 1                             | 2.632132000  | -0.784356000 | 2.250209000  |
| 1                             | 2.407518000  | -0.570671000 | -2.592222000 |
| 1                             | -2.041998000 | 0.920092000  | 2.349978000  |
| 1                             | -1.932188000 | -1.186337000 | 2.604791000  |
| 1                             | -2.102635000 | -1.177745000 | -2.379178000 |
| 1                             | 1.888418000  | 1.470256000  | -2.354727000 |
| 1                             | 1.750725000  | 1.082237000  | 2.741259000  |
| 8                             | -2.015353000 | 3.134301000  | 0.141097000  |
| 1                             | -1.849786000 | 3.782162000  | -0.554838000 |
| 1                             | -1.211858000 | 2.569862000  | 0.136712000  |
| E(RB3LYP) = -1802.01666245    |              |              |              |
| Zero-point correction=        |              | 0.230368     |              |
| Thermal correction to Energy= |              | 0.250064     |              |

|                                              |              |
|----------------------------------------------|--------------|
| Thermal correction to Enthalpy=              | 0.251008     |
| Thermal correction to Gibbs Free Energy=     | 0.181475     |
| Sum of electronic and zero-point Energies=   | -1801.786294 |
| Sum of electronic and thermal Energies=      | -1801.766599 |
| Sum of electronic and thermal Enthalpies=    | -1801.765654 |
| Sum of electronic and thermal Free Energies= | -1801.835188 |

### 35...H<sub>2</sub>O

|    |              |              |              |
|----|--------------|--------------|--------------|
| 42 | -0.163398000 | 0.050645000  | 0.048431000  |
| 15 | 1.865435000  | -1.274071000 | 0.723333000  |
| 15 | -1.175620000 | -2.074462000 | -0.873824000 |
| 15 | -1.898793000 | 1.356954000  | -1.130375000 |
| 7  | -0.983209000 | 0.038185000  | 1.694097000  |
| 8  | -1.573995000 | 0.050663000  | 2.721123000  |
| 6  | 0.873242000  | 1.736482000  | 0.373340000  |
| 8  | 1.509042000  | 2.694633000  | 0.527836000  |
| 1  | 2.444078000  | -2.211877000 | -0.158176000 |
| 1  | 1.695405000  | -2.138568000 | 1.834847000  |
| 1  | 3.052953000  | -0.647529000 | 1.152700000  |
| 1  | -2.020495000 | -2.912327000 | -0.101809000 |
| 1  | -2.014070000 | -2.000920000 | -2.014590000 |
| 1  | -0.331019000 | -3.099649000 | -1.365376000 |
| 1  | -2.679279000 | 0.764369000  | -2.157542000 |
| 1  | -2.973969000 | 1.943028000  | -0.416121000 |
| 1  | -1.516814000 | 2.508059000  | -1.857612000 |
| 1  | 0.473625000  | 0.065487000  | -1.670953000 |
| 8  | 3.184144000  | 0.194936000  | -1.630307000 |
| 1  | 2.222395000  | 0.170888000  | -1.792981000 |
| 1  | 3.334064000  | 1.097605000  | -1.321448000 |

E(RB+HF-LYP) = -1417.33587737

|                                              |              |
|----------------------------------------------|--------------|
| Zero-point correction=                       | 0.130727     |
| Thermal correction to Energy=                | 0.148730     |
| Thermal correction to Enthalpy=              | 0.149674     |
| Thermal correction to Gibbs Free Energy=     | 0.083300     |
| Sum of electronic and zero-point Energies=   | -1417.205150 |
| Sum of electronic and thermal Energies=      | -1417.187148 |
| Sum of electronic and thermal Enthalpies=    | -1417.186204 |
| Sum of electronic and thermal Free Energies= | -1417.252578 |

### 36...H<sub>2</sub>O

|    |              |              |              |
|----|--------------|--------------|--------------|
| 42 | 0.093930000  | -0.303583000 | 0.254411000  |
| 1  | 0.238575000  | 1.124913000  | -0.909648000 |
| 15 | -1.805854000 | 0.899770000  | 1.316962000  |
| 15 | -1.756600000 | -1.089964000 | -1.206013000 |
| 15 | 1.935676000  | 0.992875000  | 1.253849000  |
| 15 | 1.944594000  | -1.118926000 | -1.164162000 |
| 7  | 0.098488000  | -1.703085000 | 1.426796000  |
| 8  | 0.150089000  | -2.611137000 | 2.202522000  |
| 6  | -3.402365000 | 0.192146000  | 0.652217000  |
| 1  | -3.489270000 | -0.781533000 | 1.159808000  |
| 6  | -4.740669000 | 0.941946000  | 0.760609000  |
| 1  | -5.182026000 | 0.869983000  | 1.759180000  |
| 1  | -4.583760000 | 2.005838000  | 0.549511000  |
| 6  | -5.638662000 | 0.301062000  | -0.344761000 |

|                                              |              |              |              |
|----------------------------------------------|--------------|--------------|--------------|
| 1                                            | -6.143716000 | 1.077786000  | -0.926697000 |
| 1                                            | -6.422478000 | -0.325919000 | 0.091353000  |
| 6                                            | -4.686674000 | -0.547971000 | -1.243841000 |
| 1                                            | -4.794386000 | -1.613788000 | -1.008262000 |
| 1                                            | -4.897153000 | -0.428435000 | -2.310576000 |
| 6                                            | -3.277726000 | -0.064465000 | -0.865850000 |
| 1                                            | -3.068885000 | 0.898003000  | -1.353655000 |
| 1                                            | -2.054030000 | 0.857276000  | 2.713686000  |
| 1                                            | -2.020838000 | 2.291462000  | 1.148866000  |
| 1                                            | -1.723719000 | -1.076735000 | -2.623911000 |
| 1                                            | -2.265077000 | -2.407683000 | -1.056445000 |
| 6                                            | 3.563153000  | -0.482708000 | -0.475493000 |
| 1                                            | 3.762803000  | -1.142998000 | 0.383128000  |
| 6                                            | 4.836021000  | -0.367076000 | -1.330744000 |
| 1                                            | 5.334458000  | -1.330616000 | -1.471432000 |
| 1                                            | 4.577921000  | 0.011394000  | -2.326745000 |
| 6                                            | 5.726161000  | 0.668425000  | -0.572726000 |
| 1                                            | 6.126741000  | 1.413258000  | -1.267155000 |
| 1                                            | 6.586628000  | 0.185537000  | -0.099744000 |
| 6                                            | 4.806469000  | 1.332388000  | 0.499043000  |
| 1                                            | 4.950291000  | 2.414701000  | 0.567767000  |
| 1                                            | 5.017371000  | 0.914357000  | 1.490502000  |
| 6                                            | 3.380871000  | 0.951085000  | 0.068678000  |
| 1                                            | 3.064396000  | 1.594260000  | -0.765549000 |
| 1                                            | 2.573663000  | 0.581930000  | 2.456147000  |
| 1                                            | 1.882935000  | 2.378788000  | 1.559627000  |
| 1                                            | 2.264904000  | -2.488821000 | -1.356203000 |
| 1                                            | 2.048327000  | -0.725512000 | -2.523342000 |
| 8                                            | -1.664652000 | 2.616516000  | -1.884680000 |
| 1                                            | -0.928767000 | 2.061410000  | -1.545953000 |
| 1                                            | -1.539583000 | 3.464870000  | -1.442189000 |
| E(RB3LYP) = -2035.47444958                   |              |              |              |
| Zero-point correction=                       |              |              | 0.359263     |
| Thermal correction to Energy=                |              |              | 0.384326     |
| Thermal correction to Enthalpy=              |              |              | 0.385270     |
| Thermal correction to Gibbs Free Energy=     |              |              | 0.302790     |
| Sum of electronic and zero-point Energies=   |              |              | -2035.115186 |
| Sum of electronic and thermal Energies=      |              |              | -2035.090123 |
| Sum of electronic and thermal Enthalpies=    |              |              | -2035.089179 |
| Sum of electronic and thermal Free Energies= |              |              | -2035.171660 |

### 37...H<sub>2</sub>O

|    |              |              |              |
|----|--------------|--------------|--------------|
| 74 | 0.212990000  | 0.031896000  | -0.038524000 |
| 1  | -0.570811000 | 0.128851000  | -1.673750000 |
| 8  | -1.602687000 | 2.591264000  | 0.631729000  |
| 8  | 1.554778000  | -2.567962000 | -1.367343000 |
| 8  | 2.384214000  | 1.884466000  | -1.450385000 |
| 8  | 1.709298000  | -0.110447000 | 2.593230000  |
| 15 | -1.772749000 | -1.439315000 | 0.633335000  |
| 6  | -0.927084000 | 1.681985000  | 0.420385000  |
| 6  | 1.091615000  | -1.640446000 | -0.868434000 |
| 6  | 1.607616000  | 1.213842000  | -0.926974000 |
| 7  | 1.102205000  | -0.064025000 | 1.583649000  |
| 1  | -1.474514000 | -2.476055000 | 1.548736000  |



|                                              |              |              |              |
|----------------------------------------------|--------------|--------------|--------------|
| 1                                            | -2.889791000 | -0.889501000 | 1.288345000  |
| 1                                            | -2.428324000 | -2.197392000 | -0.352275000 |
| 8                                            | -3.318308000 | 0.223489000  | -1.334236000 |
| 1                                            | -3.544858000 | 1.145020000  | -1.156801000 |
| 1                                            | -2.428406000 | 0.267907000  | -1.722869000 |
| E(RB3LYP) = -958.009883348                   |              |              |              |
| Zero-point correction=                       |              | 0.091769     |              |
| Thermal correction to Energy=                |              | 0.108287     |              |
| Thermal correction to Enthalpy=              |              | 0.109231     |              |
| Thermal correction to Gibbs Free Energy=     |              | 0.045673     |              |
| Sum of electronic and zero-point Energies=   |              | -957.918115  |              |
| Sum of electronic and thermal Energies=      |              | -957.901596  |              |
| Sum of electronic and thermal Enthalpies=    |              | -957.900652  |              |
| Sum of electronic and thermal Free Energies= |              | -957.964210  |              |

### 38...H<sub>2</sub>O

|                                              |              |              |              |
|----------------------------------------------|--------------|--------------|--------------|
| 74                                           | -0.158311000 | -0.011195000 | 0.001239000  |
| 15                                           | 1.884903000  | -1.362868000 | 0.538327000  |
| 15                                           | -1.937333000 | 1.374664000  | -1.030376000 |
| 7                                            | -1.001482000 | -0.274918000 | 1.617482000  |
| 8                                            | -1.593411000 | -0.423144000 | 2.634136000  |
| 6                                            | 0.841308000  | 1.681517000  | 0.560843000  |
| 8                                            | 1.445439000  | 2.630505000  | 0.830972000  |
| 1                                            | 2.533422000  | -2.081609000 | -0.483307000 |
| 1                                            | 1.671433000  | -2.425104000 | 1.448805000  |
| 1                                            | 3.012604000  | -0.783629000 | 1.152756000  |
| 1                                            | -2.581368000 | 0.916194000  | -2.202602000 |
| 1                                            | -3.095059000 | 1.699626000  | -0.283822000 |
| 1                                            | -1.626926000 | 2.676617000  | -1.486368000 |
| 1                                            | 0.541110000  | 0.293295000  | -1.659513000 |
| 8                                            | 3.285328000  | 0.440671000  | -1.472610000 |
| 1                                            | 2.348475000  | 0.442591000  | -1.737013000 |
| 1                                            | 3.428931000  | 1.332239000  | -1.130841000 |
| 6                                            | -0.956957000 | -1.670219000 | -0.901564000 |
| 8                                            | -1.390713000 | -2.593292000 | -1.443385000 |
| E(RB+HF-LYP) = -1187.82408157                |              |              |              |
| Zero-point correction=                       |              | 0.111692     |              |
| Thermal correction to Energy=                |              | 0.128893     |              |
| Thermal correction to Enthalpy=              |              | 0.129837     |              |
| Thermal correction to Gibbs Free Energy=     |              | 0.064514     |              |
| Sum of electronic and zero-point Energies=   |              | -1187.712390 |              |
| Sum of electronic and thermal Energies=      |              | -1187.695188 |              |
| Sum of electronic and thermal Enthalpies=    |              | -1187.694244 |              |
| Sum of electronic and thermal Free Energies= |              | -1187.759568 |              |

### 39...H<sub>2</sub>O

|    |              |              |              |
|----|--------------|--------------|--------------|
| 74 | 0.149993000  | 0.000335000  | 0.011767000  |
| 15 | -1.456119000 | 1.768829000  | 0.616125000  |
| 15 | 1.579645000  | 1.672737000  | -1.057738000 |
| 15 | 1.495927000  | -1.760866000 | -1.020450000 |
| 7  | 1.028122000  | -0.004208000 | 1.608264000  |
| 8  | 1.644808000  | -0.007817000 | 2.635912000  |
| 1  | -1.765131000 | 2.803313000  | -0.302362000 |
| 1  | -1.143372000 | 2.596868000  | 1.723375000  |

|    |              |              |              |
|----|--------------|--------------|--------------|
| 1  | -2.793038000 | 1.469202000  | 0.981419000  |
| 1  | 2.592764000  | 2.319784000  | -0.305052000 |
| 1  | 2.393289000  | 1.327231000  | -2.174003000 |
| 1  | 1.028271000  | 2.844129000  | -1.643639000 |
| 1  | 2.325457000  | -1.479215000 | -2.142924000 |
| 1  | 2.475986000  | -2.440748000 | -0.253162000 |
| 1  | 0.887823000  | -2.915801000 | -1.582290000 |
| 1  | -0.617964000 | 0.003459000  | -1.669891000 |
| 8  | -3.266664000 | 0.011626000  | -1.533712000 |
| 1  | -2.298832000 | 0.013925000  | -1.678709000 |
| 1  | -3.649869000 | -0.064520000 | -2.415989000 |
| 15 | -1.536526000 | -1.679118000 | 0.658498000  |
| 1  | -1.894677000 | -2.718480000 | -0.235785000 |
| 1  | -1.250565000 | -2.496160000 | 1.781192000  |
| 1  | -2.855501000 | -1.312553000 | 1.025121000  |

E(RB+HF-LYP) = -1647.43889764  
Zero-point correction= 0.150339  
Thermal correction to Energy= 0.168899  
Thermal correction to Enthalpy= 0.169843  
Thermal correction to Gibbs Free Energy= 0.102265  
Sum of electronic and zero-point Energies= -1647.288558  
Sum of electronic and thermal Energies= -1647.269999  
Sum of electronic and thermal Enthalpies= -1647.269055  
Sum of electronic and thermal Free Energies= -1647.336633

#### 40...H<sub>2</sub>O

|    |              |              |              |
|----|--------------|--------------|--------------|
| 74 | -0.001255000 | -0.055544000 | -0.081037000 |
| 15 | -2.435381000 | -0.060887000 | -0.452533000 |
| 15 | 0.009983000  | 2.445527000  | -0.275301000 |
| 15 | 2.431845000  | -0.076541000 | -0.456394000 |
| 7  | 0.001257000  | -0.114910000 | 1.754690000  |
| 8  | 0.006368000  | -0.118824000 | 2.946097000  |
| 6  | -0.005964000 | -2.045542000 | -0.318279000 |
| 8  | -0.007442000 | -3.196697000 | -0.475954000 |
| 1  | -3.100105000 | 1.086184000  | -0.962792000 |
| 1  | -3.321146000 | -0.312418000 | 0.624098000  |
| 1  | -2.980274000 | -0.991564000 | -1.367412000 |
| 1  | 0.052168000  | 3.276253000  | 0.872770000  |
| 1  | 1.051974000  | 3.086948000  | -0.991829000 |
| 1  | -1.063496000 | 3.105683000  | -0.925870000 |
| 1  | 3.097088000  | 1.053849000  | -1.001445000 |
| 1  | 3.319562000  | -0.297910000 | 0.625381000  |
| 1  | 2.973514000  | -1.034502000 | -1.344745000 |
| 1  | 0.002426000  | 0.118055000  | -1.902262000 |

E(RB+HF-LYP) = -1341.20361298  
Zero-point correction= 0.106518  
Thermal correction to Energy= 0.121181  
Thermal correction to Enthalpy= 0.122125  
Thermal correction to Gibbs Free Energy= 0.063254  
Sum of electronic and zero-point Energies= -1341.097095  
Sum of electronic and thermal Energies= -1341.082432  
Sum of electronic and thermal Enthalpies= -1341.081488  
Sum of electronic and thermal Free Energies= -1341.140359

**41...H<sub>2</sub>O**

|    |              |              |              |
|----|--------------|--------------|--------------|
| 74 | 0.113611000  | -0.183546000 | 0.007504000  |
| 15 | 1.930089000  | 0.221533000  | -1.573633000 |
| 15 | 1.886729000  | 0.408420000  | 1.571179000  |
| 15 | -1.782926000 | -0.093691000 | 1.567593000  |
| 15 | -1.757899000 | -0.151124000 | -1.579338000 |
| 6  | 3.569477000  | 0.532822000  | -0.683104000 |
| 1  | 4.018695000  | -0.454702000 | -0.525837000 |
| 1  | 4.252576000  | 1.111139000  | -1.312251000 |
| 6  | 3.328342000  | 1.223230000  | 0.665311000  |
| 1  | 3.037269000  | 2.268486000  | 0.514040000  |
| 1  | 4.229770000  | 1.211519000  | 1.285417000  |
| 6  | -3.416550000 | -0.410216000 | 0.679960000  |
| 1  | -3.520967000 | -1.499622000 | 0.616429000  |
| 1  | -4.254232000 | -0.026715000 | 1.269847000  |
| 6  | -3.393010000 | 0.217945000  | -0.719251000 |
| 1  | -3.433413000 | 1.309144000  | -0.637459000 |
| 1  | -4.233716000 | -0.129186000 | -1.327408000 |
| 8  | 0.510764000  | -3.179936000 | 0.100815000  |
| 7  | 0.326899000  | -1.993847000 | 0.067683000  |
| 1  | 0.039218000  | 1.660743000  | -0.066979000 |
| 1  | -1.856870000 | 0.738748000  | -2.678485000 |
| 1  | 2.567186000  | -0.604391000 | 2.297031000  |
| 1  | 2.357796000  | -0.737634000 | -2.526977000 |
| 1  | -2.077800000 | 1.098713000  | 2.271510000  |
| 1  | -1.913179000 | -0.989593000 | 2.658216000  |
| 1  | -2.066258000 | -1.341275000 | -2.286821000 |
| 1  | 1.889288000  | 1.335290000  | -2.450463000 |
| 1  | 1.739012000  | 1.326410000  | 2.641999000  |
| 8  | -2.120005000 | 3.144172000  | -0.033346000 |
| 1  | -1.296557000 | 2.612384000  | -0.008409000 |
| 1  | -1.968835000 | 3.776258000  | -0.746753000 |

E(RB3LYP) = -1802.31228426

|                                              |              |
|----------------------------------------------|--------------|
| Zero-point correction=                       | 0.230691     |
| Thermal correction to Energy=                | 0.250311     |
| Thermal correction to Enthalpy=              | 0.251255     |
| Thermal correction to Gibbs Free Energy=     | 0.181445     |
| Sum of electronic and zero-point Energies=   | -1802.081593 |
| Sum of electronic and thermal Energies=      | -1802.061973 |
| Sum of electronic and thermal Enthalpies=    | -1802.061029 |
| Sum of electronic and thermal Free Energies= | -1802.130839 |

**42...H<sub>2</sub>O**

|    |              |              |              |
|----|--------------|--------------|--------------|
| 74 | 0.125375000  | -0.014618000 | -0.324635000 |
| 15 | 1.948793000  | 1.570776000  | 0.044675000  |
| 15 | 1.903923000  | -1.576603000 | 0.265808000  |
| 15 | -1.770487000 | -1.575847000 | -0.168220000 |
| 15 | -1.753621000 | 1.573202000  | -0.186179000 |
| 6  | 3.599684000  | 0.677853000  | 0.281066000  |
| 1  | 3.999241000  | 0.509012000  | -0.725542000 |
| 1  | 4.311729000  | 1.310240000  | 0.820070000  |
| 6  | 3.386020000  | -0.661337000 | 0.997241000  |
| 1  | 3.144212000  | -0.493910000 | 2.052492000  |

|   |              |              |              |
|---|--------------|--------------|--------------|
| 1 | 4.284012000  | -1.285187000 | 0.953228000  |
| 6 | -3.405460000 | -0.692627000 | -0.486975000 |
| 1 | -3.502244000 | -0.614769000 | -1.575798000 |
| 1 | -4.243868000 | -1.289325000 | -0.114938000 |
| 6 | -3.387603000 | 0.697591000  | 0.160903000  |
| 1 | -3.428188000 | 0.601025000  | 1.250767000  |
| 1 | -4.230178000 | 1.308323000  | -0.177170000 |
| 6 | 0.306900000  | -0.084388000 | -2.134113000 |
| 1 | 0.168932000  | 0.038925000  | 1.581185000  |
| 1 | -1.847164000 | 2.623178000  | 0.762497000  |
| 1 | 2.544391000  | -2.367916000 | -0.720516000 |
| 1 | 2.344585000  | 2.546456000  | -0.903137000 |
| 1 | -2.070043000 | -2.248641000 | 1.042497000  |
| 1 | -1.909169000 | -2.686938000 | -1.033453000 |
| 1 | -2.073599000 | 2.342801000  | -1.329401000 |
| 1 | 1.958811000  | 2.421399000  | 1.180730000  |
| 1 | 1.769326000  | -2.594456000 | 1.244529000  |
| 1 | 0.493506000  | -0.134965000 | -3.212210000 |
| 8 | -1.991237000 | 0.092996000  | 3.060664000  |
| 1 | -1.168016000 | 0.031000000  | 2.527080000  |
| 1 | -1.820479000 | 0.826032000  | 3.664753000  |

E(RB3LYP) = -1710.99727790

|                                              |              |
|----------------------------------------------|--------------|
| Zero-point correction=                       | 0.236084     |
| Thermal correction to Energy=                | 0.254998     |
| Thermal correction to Enthalpy=              | 0.255943     |
| Thermal correction to Gibbs Free Energy=     | 0.188492     |
| Sum of electronic and zero-point Energies=   | -1710.761194 |
| Sum of electronic and thermal Energies=      | -1710.742279 |
| Sum of electronic and thermal Enthalpies=    | -1710.741335 |
| Sum of electronic and thermal Free Energies= | -1710.808786 |

### TS31

|    |              |              |              |
|----|--------------|--------------|--------------|
| 42 | 0.023698000  | -0.011494000 | -0.012623000 |
| 15 | -2.408763000 | 0.682700000  | 0.013319000  |
| 15 | 2.430674000  | -0.565757000 | -0.461553000 |
| 7  | 0.174660000  | -0.098565000 | 1.773139000  |
| 8  | 0.248213000  | -0.152983000 | 2.955078000  |
| 6  | -0.515092000 | -1.999831000 | -0.065197000 |
| 8  | -0.826497000 | -3.110461000 | -0.053154000 |
| 1  | -2.805788000 | 1.819758000  | -0.723663000 |
| 1  | -3.024023000 | 1.015516000  | 1.243479000  |
| 1  | -3.393573000 | -0.209506000 | -0.465900000 |
| 1  | 3.342536000  | 0.485179000  | -0.681577000 |
| 1  | 3.174625000  | -1.278659000 | 0.523609000  |
| 1  | 2.762158000  | -1.377710000 | -1.565845000 |
| 1  | 1.212277000  | 0.817587000  | -2.136861000 |
| 8  | -0.838561000 | -0.006140000 | -2.273054000 |
| 1  | 0.151951000  | 0.434012000  | -2.427496000 |
| 1  | -0.816349000 | -0.873551000 | -2.704913000 |
| 6  | 0.609149000  | 1.997770000  | -0.069756000 |
| 8  | 0.952500000  | 3.094370000  | -0.055046000 |

E(RB+HF-LYP) = -1187.475552

|                               |                             |
|-------------------------------|-----------------------------|
| Zero-point correction=        | 0.106576 (Hartree/Particle) |
| Thermal correction to Energy= | 0.122622                    |

Thermal correction to Enthalpy= 0.123567  
 Thermal correction to Gibbs Free Energy= 0.062559  
 Sum of electronic and zero-point Energies= -1187.368977  
 Sum of electronic and thermal Energies= -1187.352930  
 Sum of electronic and thermal Enthalpies= -1187.351986  
 Sum of electronic and thermal Free Energies= -1187.412994

### TS32

|    |              |              |              |
|----|--------------|--------------|--------------|
| 42 | -0.569669000 | 0.016240000  | -0.095642000 |
| 1  | -0.946644000 | 0.778352000  | -2.198543000 |
| 15 | 1.471811000  | -1.568784000 | 0.249176000  |
| 15 | 1.369443000  | 1.680118000  | 0.051226000  |
| 6  | -1.880869000 | -1.476817000 | -0.514460000 |
| 6  | -2.006334000 | 1.443331000  | -0.335313000 |
| 7  | -0.927547000 | -0.075775000 | 1.661029000  |
| 8  | -1.171080000 | -0.114047000 | 2.822413000  |
| 6  | 3.017119000  | -0.538326000 | 0.541832000  |
| 1  | 3.054311000  | -0.361953000 | 1.622801000  |
| 1  | 3.909430000  | -1.113578000 | 0.278446000  |
| 1  | 3.828534000  | 1.431435000  | 0.075807000  |
| 6  | 2.990145000  | 0.793155000  | -0.219102000 |
| 1  | 3.028609000  | 0.611232000  | -1.295194000 |
| 1  | 1.552431000  | -2.400174000 | 1.398184000  |
| 1  | 1.902182000  | -2.535535000 | -0.684059000 |
| 1  | 1.475493000  | 2.755794000  | -0.856275000 |
| 1  | 1.600758000  | 2.400091000  | 1.247820000  |
| 8  | -2.826638000 | 2.248174000  | -0.417859000 |
| 8  | -2.619212000 | -2.331352000 | -0.747395000 |
| 8  | 0.989506000  | -0.299327000 | -2.110438000 |
| 1  | 0.818074000  | -1.120552000 | -2.595652000 |
| 1  | -0.124024000 | 0.377562000  | -2.321112000 |

E(RB3LYP) = -1264.912216

Zero-point correction= 0.146514 (Hartree/Particle)  
 Thermal correction to Energy= 0.163413  
 Thermal correction to Enthalpy= 0.164357  
 Thermal correction to Gibbs Free Energy= 0.101227  
 Sum of electronic and zero-point Energies= -1264.765703  
 Sum of electronic and thermal Energies= -1264.748804  
 Sum of electronic and thermal Enthalpies= -1264.747859  
 Sum of electronic and thermal Free Energies= -1264.810989

### TS33

|    |              |              |              |
|----|--------------|--------------|--------------|
| 42 | 0.008010000  | 0.087431000  | -0.003448000 |
| 15 | 2.300211000  | -0.969961000 | 0.096149000  |
| 15 | -2.265565000 | 0.990799000  | -0.474696000 |
| 7  | -0.110634000 | 0.336994000  | 1.761996000  |
| 8  | -0.180420000 | 0.488258000  | 2.939715000  |
| 6  | 0.844061000  | 1.902254000  | -0.214536000 |
| 8  | 1.339244000  | 2.946345000  | -0.307567000 |
| 1  | 2.538913000  | -2.257002000 | -0.444891000 |
| 1  | 2.902274000  | -1.188381000 | 1.358958000  |
| 1  | 3.390224000  | -0.318032000 | -0.524209000 |
| 1  | -3.360697000 | 0.107005000  | -0.596109000 |

|    |              |              |              |
|----|--------------|--------------|--------------|
| 1  | -2.853084000 | 1.902491000  | 0.452233000  |
| 1  | -2.484275000 | 1.756841000  | -1.638699000 |
| 1  | -1.360846000 | -0.723859000 | -2.005735000 |
| 8  | 0.822174000  | -0.292246000 | -2.294571000 |
| 1  | -0.206189000 | -0.545493000 | -2.395592000 |
| 1  | 0.945295000  | 0.530040000  | -2.791840000 |
| 15 | -1.089025000 | -2.236449000 | 0.037195000  |
| 1  | -1.057547000 | -3.062017000 | 1.200473000  |
| 1  | -0.639130000 | -3.213808000 | -0.876697000 |
| 1  | -2.473577000 | -2.337051000 | -0.220199000 |

E(RB3LYP) = -957.957777

|                                              |                             |
|----------------------------------------------|-----------------------------|
| Zero-point correction=                       | 0.127558 (Hartree/Particle) |
| Thermal correction to Energy=                | 0.143881                    |
| Thermal correction to Enthalpy=              | 0.144826                    |
| Thermal correction to Gibbs Free Energy=     | 0.083811                    |
| Sum of electronic and zero-point Energies=   | -1417.167889                |
| Sum of electronic and thermal Energies=      | -1417.151566                |
| Sum of electronic and thermal Enthalpies=    | -1417.150622                |
| Sum of electronic and thermal Free Energies= | -1417.211636                |

#### TS34

|    |              |              |              |
|----|--------------|--------------|--------------|
| 42 | -0.033425000 | 0.004907000  | 0.046630000  |
| 15 | -1.928020000 | 1.589582000  | -0.131921000 |
| 15 | -1.920380000 | -1.577367000 | -0.202976000 |
| 15 | 1.824744000  | -1.619487000 | -0.158532000 |
| 15 | 1.921504000  | 1.556258000  | 0.111568000  |
| 6  | -3.568285000 | 0.685888000  | 0.055865000  |
| 1  | -3.714829000 | 0.578957000  | 1.137179000  |
| 1  | -4.391744000 | 1.295074000  | -0.329109000 |
| 6  | -3.532599000 | -0.695196000 | -0.610844000 |
| 1  | -3.563424000 | -0.599865000 | -1.698127000 |
| 1  | -4.383067000 | -1.302697000 | -0.286345000 |
| 6  | 3.488738000  | -0.786578000 | 0.135545000  |
| 1  | 3.635858000  | -0.779466000 | 1.221968000  |
| 1  | 4.300311000  | -1.374408000 | -0.303539000 |
| 6  | 3.486020000  | 0.647791000  | -0.409450000 |
| 1  | 3.468892000  | 0.635995000  | -1.503424000 |
| 1  | 4.377144000  | 1.192932000  | -0.083941000 |
| 8  | -0.124153000 | -0.097486000 | 3.019759000  |
| 7  | -0.094351000 | -0.062124000 | 1.820031000  |
| 1  | -1.249570000 | -0.470418000 | -2.174906000 |
| 1  | 2.121727000  | 2.769899000  | -0.601144000 |
| 1  | -2.346877000 | -2.271906000 | 0.974253000  |
| 1  | -2.137707000 | 2.650293000  | 0.786966000  |
| 1  | 2.041500000  | -2.252233000 | -1.404696000 |
| 1  | 1.971659000  | -2.760785000 | 0.667568000  |
| 1  | 2.308525000  | 2.051476000  | 1.383490000  |
| 1  | -2.140011000 | 2.341931000  | -1.313797000 |
| 1  | -1.976258000 | -2.681639000 | -1.081539000 |
| 8  | 0.817200000  | 0.315283000  | -2.315821000 |
| 1  | 0.689465000  | 1.232306000  | -2.600805000 |
| 1  | -0.202619000 | -0.115285000 | -2.419023000 |

E(RB3LYP) = -1801.973206

|                                              |                             |
|----------------------------------------------|-----------------------------|
| Zero-point correction=                       | 0.225555 (Hartree/Particle) |
| Thermal correction to Energy=                | 0.244190                    |
| Thermal correction to Enthalpy=              | 0.245134                    |
| Thermal correction to Gibbs Free Energy=     | 0.179278                    |
| Sum of electronic and zero-point Energies=   | -1801.747651                |
| Sum of electronic and thermal Energies=      | -1801.729017                |
| Sum of electronic and thermal Enthalpies=    | -1801.728073                |
| Sum of electronic and thermal Free Energies= | -1801.793929                |

### TS35

|    |              |              |              |
|----|--------------|--------------|--------------|
| 42 | 0.019858000  | -0.012476000 | 0.010883000  |
| 15 | -1.794923000 | 1.697907000  | 0.089656000  |
| 15 | 1.878328000  | -1.594765000 | -0.445857000 |
| 7  | 0.110369000  | -0.196039000 | 1.774858000  |
| 8  | 0.158366000  | -0.326274000 | 2.964321000  |
| 1  | -1.685876000 | 2.902893000  | -0.648144000 |
| 1  | -2.143952000 | 2.281045000  | 1.333290000  |
| 1  | -3.112998000 | 1.377356000  | -0.329742000 |
| 1  | 3.180589000  | -1.095970000 | -0.685510000 |
| 1  | 2.232297000  | -2.565436000 | 0.538521000  |
| 1  | 1.818203000  | -2.490256000 | -1.539830000 |
| 1  | 1.453273000  | 0.276424000  | -2.117588000 |
| 8  | -0.772330000 | 0.393912000  | -2.315203000 |
| 1  | 0.302388000  | 0.378187000  | -2.426667000 |
| 1  | -1.090745000 | -0.376057000 | -2.808927000 |
| 15 | 1.734018000  | 1.782385000  | -0.096114000 |
| 1  | 2.001501000  | 2.564587000  | 1.066664000  |
| 1  | 1.571963000  | 2.862723000  | -0.993588000 |
| 1  | 3.074879000  | 1.463693000  | -0.415640000 |
| 15 | -1.671561000 | -1.827814000 | -0.125436000 |
| 1  | -3.052923000 | -1.558673000 | -0.338619000 |
| 1  | -1.597914000 | -2.892931000 | -1.065981000 |
| 1  | -1.833528000 | -2.638126000 | 1.023968000  |

E(RB+HF-LYP) = -1647.102982

|                                              |                             |
|----------------------------------------------|-----------------------------|
| Zero-point correction=                       | 0.146169 (Hartree/Particle) |
| Thermal correction to Energy=                | 0.163341                    |
| Thermal correction to Enthalpy=              | 0.164285                    |
| Thermal correction to Gibbs Free Energy=     | 0.101680                    |
| Sum of electronic and zero-point Energies=   | -1646.956814                |
| Sum of electronic and thermal Energies=      | -1646.939642                |
| Sum of electronic and thermal Enthalpies=    | -1646.938698                |
| Sum of electronic and thermal Free Energies= | -1647.001303                |

### TS36

|    |              |              |              |
|----|--------------|--------------|--------------|
| 42 | -0.027291000 | -0.020491000 | 0.032471000  |
| 1  | -1.316830000 | 0.028835000  | -2.169424000 |
| 15 | 1.884921000  | -1.627064000 | -0.029979000 |
| 15 | 1.870092000  | 1.615431000  | 0.010401000  |
| 15 | -1.941270000 | -1.604571000 | -0.241724000 |
| 15 | -1.915649000 | 1.617593000  | -0.014698000 |
| 7  | -0.083488000 | -0.108198000 | 1.803744000  |
| 8  | -0.111301000 | -0.168423000 | 3.004680000  |
| 6  | 3.454207000  | -0.673199000 | 0.316139000  |
| 1  | 3.408309000  | -0.475800000 | 1.398437000  |

|   |              |              |              |
|---|--------------|--------------|--------------|
| 6 | 4.841563000  | -1.235727000 | -0.037702000 |
| 1 | 5.186923000  | -1.981475000 | 0.684305000  |
| 1 | 4.801177000  | -1.728749000 | -1.016168000 |
| 6 | 5.769686000  | 0.018155000  | -0.103005000 |
| 1 | 6.382949000  | -0.004797000 | -1.008951000 |
| 1 | 6.461657000  | 0.047642000  | 0.744019000  |
| 6 | 4.826431000  | 1.260517000  | -0.091127000 |
| 1 | 4.818538000  | 1.719556000  | 0.904537000  |
| 1 | 5.136105000  | 2.033157000  | -0.800795000 |
| 6 | 3.435357000  | 0.690082000  | -0.412320000 |
| 1 | 3.346996000  | 0.509277000  | -1.491909000 |
| 1 | 2.015209000  | -2.704038000 | 0.883005000  |
| 1 | 2.264658000  | -2.350174000 | -1.194681000 |
| 1 | 1.974580000  | 2.750166000  | -0.830606000 |
| 1 | 2.253439000  | 2.245304000  | 1.224244000  |
| 6 | -3.497483000 | 0.664886000  | 0.258143000  |
| 1 | -3.443659000 | 0.397516000  | 1.325443000  |
| 6 | -4.882220000 | 1.264920000  | -0.035793000 |
| 1 | -5.200722000 | 1.979291000  | 0.729157000  |
| 1 | -4.856525000 | 1.801705000  | -0.991088000 |
| 6 | -5.827425000 | 0.025274000  | -0.135290000 |
| 1 | -6.469835000 | 0.101472000  | -1.017778000 |
| 1 | -6.491078000 | -0.040795000 | 0.732235000  |
| 6 | -4.899283000 | -1.227212000 | -0.219044000 |
| 1 | -5.239629000 | -1.954773000 | -0.961931000 |
| 1 | -4.869479000 | -1.741871000 | 0.748557000  |
| 6 | -3.514910000 | -0.648146000 | -0.553010000 |
| 1 | -3.464847000 | -0.392604000 | -1.617859000 |
| 1 | -2.336976000 | -2.387988000 | 0.879991000  |
| 1 | -2.035500000 | -2.631592000 | -1.213489000 |
| 1 | -2.056862000 | 2.613137000  | 0.990107000  |
| 1 | -2.218342000 | 2.433486000  | -1.129872000 |
| 8 | 0.869469000  | 0.275613000  | -2.313182000 |
| 1 | -0.270255000 | 0.189788000  | -2.395205000 |
| 1 | 1.178362000  | -0.553345000 | -2.708214000 |

E(RB3LYP) = -2035.430935

Zero-point correction= 0.354456 (Hartree/Particle)

Thermal correction to Energy= 0.378275

Thermal correction to Enthalpy= 0.379220

Thermal correction to Gibbs Free Energy= 0.301322

Sum of electronic and zero-point Energies= -2035.076480

Sum of electronic and thermal Energies= -2035.052660

Sum of electronic and thermal Enthalpies= -2035.051716

Sum of electronic and thermal Free Energies= -2035.129614

### TS37

|    |              |              |              |
|----|--------------|--------------|--------------|
| 74 | -0.050746000 | 0.028429000  | -0.042953000 |
| 7  | -0.099000000 | 0.046075000  | 1.760817000  |
| 8  | -0.139543000 | 0.050485000  | 2.945012000  |
| 6  | -1.055569000 | -1.774468000 | -0.053386000 |
| 8  | -1.631277000 | -2.771711000 | 0.001771000  |
| 1  | 1.560576000  | 0.572371000  | -1.908616000 |
| 8  | -0.508043000 | -0.082503000 | -2.353409000 |
| 1  | 0.495975000  | 0.235729000  | -2.450212000 |



|    |              |              |              |
|----|--------------|--------------|--------------|
| 1  | -0.574976000 | -0.968798000 | -2.740400000 |
| 6  | 1.035503000  | 1.815369000  | -0.150366000 |
| 8  | 1.624438000  | 2.802625000  | -0.131866000 |
| 6  | -1.826533000 | 1.032291000  | -0.142370000 |
| 8  | -2.832795000 | 1.590066000  | -0.161000000 |
| 15 | 2.228460000  | -1.138887000 | -0.127166000 |
| 1  | 3.375832000  | -0.325669000 | -0.196425000 |
| 1  | 2.634005000  | -1.999136000 | 0.930075000  |
| 1  | 2.507269000  | -2.008332000 | -1.201431000 |

E(RB3LYP) = -957.95778

Zero-point correction= 0.087910 (Hartree/Particle)

Thermal correction to Energy= 0.103113

Thermal correction to Enthalpy= 0.104058

Thermal correction to Gibbs Free Energy= 0.044228

Sum of electronic and zero-point Energies= -957.869867

Sum of electronic and thermal Energies= -957.854664

Sum of electronic and thermal Enthalpies= -957.853720

Sum of electronic and thermal Free Energies= -957.913549

### TS38

|    |              |              |              |
|----|--------------|--------------|--------------|
| 74 | 0.028049000  | -0.003677000 | -0.030157000 |
| 15 | -2.461228000 | 0.394379000  | 0.112269000  |
| 15 | 2.471505000  | -0.307459000 | -0.455603000 |
| 7  | 0.226970000  | -0.030927000 | 1.755659000  |
| 8  | 0.324952000  | -0.050664000 | 2.943920000  |
| 6  | -0.258337000 | -2.030819000 | -0.043277000 |
| 8  | -0.425445000 | -3.174736000 | -0.023285000 |
| 1  | -3.037676000 | 1.484560000  | -0.575860000 |
| 1  | -3.023839000 | 0.633497000  | 1.388007000  |
| 1  | -3.359338000 | -0.605952000 | -0.322620000 |
| 1  | 3.238116000  | 0.810829000  | -0.839167000 |
| 1  | 3.294468000  | -0.767903000 | 0.613041000  |
| 1  | 2.903701000  | -1.219760000 | -1.440434000 |
| 1  | 1.094261000  | 0.590478000  | -2.203312000 |
| 8  | -0.985521000 | -0.084286000 | -2.214364000 |
| 1  | 0.051140000  | 0.283940000  | -2.440969000 |
| 1  | -1.042214000 | -0.977021000 | -2.588268000 |
| 6  | 0.338982000  | 2.038205000  | -0.120615000 |
| 8  | 0.533385000  | 3.173163000  | -0.145654000 |

E(RB+HF-LYP) = -1187.77474

Zero-point correction= 0.106729 (Hartree/Particle)

Thermal correction to Energy= 0.122558

Thermal correction to Enthalpy= 0.123502

Thermal correction to Gibbs Free Energy= 0.062452

Sum of electronic and zero-point Energies= -1187.668015

Sum of electronic and thermal Energies= -1187.652186

Sum of electronic and thermal Enthalpies= -1187.651242

Sum of electronic and thermal Free Energies= -1187.712292

### TS39

|    |              |              |              |
|----|--------------|--------------|--------------|
| 74 | 0.020814000  | -0.007411000 | -0.006797000 |
| 15 | -1.799648000 | 1.670380000  | 0.112791000  |
| 15 | 1.711917000  | 1.788674000  | -0.096096000 |

|    |              |              |              |
|----|--------------|--------------|--------------|
| 15 | 1.870318000  | -1.577924000 | -0.442488000 |
| 7  | 0.118619000  | -0.194117000 | 1.758328000  |
| 8  | 0.169338000  | -0.329883000 | 2.954913000  |
| 1  | -1.733154000 | 2.892256000  | -0.604782000 |
| 1  | -2.114316000 | 2.217439000  | 1.380517000  |
| 1  | -3.124529000 | 1.334262000  | -0.277502000 |
| 1  | 1.980427000  | 2.538474000  | 1.085147000  |
| 1  | 3.051925000  | 1.480241000  | -0.437900000 |
| 1  | 1.543711000  | 2.888849000  | -0.970073000 |
| 1  | 3.169657000  | -1.075744000 | -0.703915000 |
| 1  | 2.227446000  | -2.516738000 | 0.568068000  |
| 1  | 1.815606000  | -2.499470000 | -1.516869000 |
| 1  | 1.393145000  | 0.285240000  | -2.106608000 |
| 8  | -0.815481000 | 0.378999000  | -2.304080000 |
| 1  | 0.260310000  | 0.373753000  | -2.440285000 |
| 1  | -1.146594000 | -0.395726000 | -2.782418000 |
| 15 | -1.655178000 | -1.812755000 | -0.104228000 |
| 1  | -1.592707000 | -2.910851000 | -1.010026000 |
| 1  | -1.805220000 | -2.577779000 | 1.076751000  |
| 1  | -3.038289000 | -1.545503000 | -0.321798000 |

E(RB3LYP) = -1647.39206

Zero-point correction= 0.146564 (Hartree/Particle)

Thermal correction to Energy= 0.163485

Thermal correction to Enthalpy= 0.164429

Thermal correction to Gibbs Free Energy= 0.101916

Sum of electronic and zero-point Energies= -1647.245502

Sum of electronic and thermal Energies= -1647.228582

Sum of electronic and thermal Enthalpies= -1647.227637

Sum of electronic and thermal Free Energies= -1647.290151

#### TS42

|    |              |              |              |
|----|--------------|--------------|--------------|
| 74 | -0.028759000 | 0.018730000  | -0.168343000 |
| 15 | -1.905405000 | -1.582673000 | -0.046299000 |
| 15 | -1.925368000 | 1.568113000  | 0.159682000  |
| 15 | 1.868482000  | 1.582418000  | -0.081483000 |
| 15 | 1.844858000  | -1.588404000 | -0.021196000 |
| 6  | -3.565504000 | -0.701750000 | -0.207756000 |
| 1  | -3.722126000 | -0.595509000 | -1.287054000 |
| 1  | -4.372861000 | -1.328960000 | 0.182230000  |
| 6  | -3.561526000 | 0.676960000  | 0.461098000  |
| 1  | -3.657177000 | 0.577864000  | 1.543738000  |
| 1  | -4.387632000 | 1.292916000  | 0.091652000  |
| 6  | 3.502594000  | 0.670198000  | -0.339117000 |
| 1  | 3.613075000  | 0.544225000  | -1.422197000 |
| 1  | 4.344752000  | 1.273547000  | 0.013681000  |
| 6  | 3.465616000  | -0.698201000 | 0.353951000  |
| 1  | 3.491031000  | -0.579175000 | 1.441849000  |
| 1  | 4.320612000  | -1.314607000 | 0.060672000  |
| 6  | -0.039527000 | 0.088765000  | -1.950506000 |
| 1  | -1.412862000 | -0.053993000 | 2.044067000  |
| 1  | 1.931204000  | -2.645382000 | 0.917321000  |
| 1  | -2.287801000 | 2.416928000  | -0.922018000 |
| 1  | -2.079273000 | -2.555982000 | -1.065211000 |
| 1  | 2.202769000  | 2.335583000  | 1.081025000  |

|   |              |              |              |
|---|--------------|--------------|--------------|
| 1 | 2.020927000  | 2.637940000  | -1.010692000 |
| 1 | 2.204530000  | -2.328563000 | -1.173327000 |
| 1 | -2.116990000 | -2.438073000 | 1.059865000  |
| 1 | -1.998563000 | 2.551101000  | 1.177596000  |
| 1 | -0.011188000 | 0.135994000  | -3.038739000 |
| 8 | 0.784332000  | -0.209913000 | 2.222608000  |
| 1 | -0.349598000 | -0.164995000 | 2.294518000  |
| 1 | 1.072247000  | 0.624801000  | 2.620984000  |

E(RB3LYP) = -1710.960852

|                                              |                             |
|----------------------------------------------|-----------------------------|
| Zero-point correction=                       | 0.231567 (Hartree/Particle) |
| Thermal correction to Energy=                | 0.249260                    |
| Thermal correction to Enthalpy=              | 0.250205                    |
| Thermal correction to Gibbs Free Energy=     | 0.186646                    |
| Sum of electronic and zero-point Energies=   | -1710.729285                |
| Sum of electronic and thermal Energies=      | -1710.711592                |
| Sum of electronic and thermal Enthalpies=    | -1710.710648                |
| Sum of electronic and thermal Free Energies= | -1710.774206                |

### 39'

|    |              |              |              |
|----|--------------|--------------|--------------|
| 74 | 0.007930000  | -0.003219000 | -0.045977000 |
| 15 | -1.481894000 | 1.972787000  | -0.114096000 |
| 15 | 1.981588000  | 1.485351000  | -0.160520000 |
| 15 | 1.467815000  | -1.968418000 | -0.240458000 |
| 7  | 0.027640000  | -0.074734000 | 1.765134000  |
| 8  | 0.033199000  | -0.121223000 | 2.972103000  |
| 1  | -1.283686000 | 2.959088000  | -1.113330000 |
| 1  | -1.555951000 | 2.834057000  | 1.007496000  |
| 1  | -2.885579000 | 1.832741000  | -0.311772000 |
| 1  | 2.327881000  | 2.290420000  | 0.952022000  |
| 1  | 3.288336000  | 0.968202000  | -0.398532000 |
| 1  | 2.029352000  | 2.491186000  | -1.159690000 |
| 1  | 2.885341000  | -1.853735000 | -0.351710000 |
| 1  | 1.465267000  | -2.939602000 | 0.790276000  |
| 1  | 1.318664000  | -2.869110000 | -1.333124000 |
| 8  | -0.085692000 | 0.199324000  | -2.101724000 |
| 1  | 0.087897000  | -0.557338000 | -2.671194000 |
| 15 | -1.988741000 | -1.450501000 | -0.194924000 |
| 1  | -2.079878000 | -2.502672000 | -1.147334000 |
| 1  | -2.364793000 | -2.201749000 | 0.944419000  |
| 1  | -3.274730000 | -0.903227000 | -0.474216000 |

E(RB+HF-LYP) = -1646.262018

|                                              |                             |
|----------------------------------------------|-----------------------------|
| Zero-point correction=                       | 0.130809 (Hartree/Particle) |
| Thermal correction to Energy=                | 0.147764                    |
| Thermal correction to Enthalpy=              | 0.148709                    |
| Thermal correction to Gibbs Free Energy=     | 0.084243                    |
| Sum of electronic and zero-point Energies=   | -1646.131210                |
| Sum of electronic and thermal Energies=      | -1646.114255                |
| Sum of electronic and thermal Enthalpies=    | -1646.113310                |
| Sum of electronic and thermal Free Energies= | -1646.177776                |

### 42'

|    |              |              |              |
|----|--------------|--------------|--------------|
| 74 | -0.007655000 | 0.009167000  | 0.104387000  |
| 15 | -1.888867000 | 1.565806000  | -0.044770000 |
| 15 | -1.864740000 | -1.598389000 | -0.112842000 |

|    |              |              |              |
|----|--------------|--------------|--------------|
| 15 | 1.872084000  | -1.590075000 | 0.034398000  |
| 15 | 1.889030000  | 1.581511000  | -0.044823000 |
| 6  | -3.504858000 | 0.670680000  | 0.338785000  |
| 1  | -3.539973000 | 0.558305000  | 1.427859000  |
| 1  | -4.366272000 | 1.273282000  | 0.034158000  |
| 6  | -3.516958000 | -0.701811000 | -0.346987000 |
| 1  | -3.641508000 | -0.577716000 | -1.429031000 |
| 1  | -4.347711000 | -1.317915000 | 0.009374000  |
| 6  | 3.511114000  | -0.707677000 | 0.339520000  |
| 1  | 3.598176000  | -0.581902000 | 1.424544000  |
| 1  | 4.353330000  | -1.321548000 | 0.005592000  |
| 6  | 3.508652000  | 0.656821000  | -0.362091000 |
| 1  | 3.566556000  | 0.519758000  | -1.447738000 |
| 1  | 4.366898000  | 1.263670000  | -0.058466000 |
| 6  | -0.113521000 | 0.056521000  | 1.923068000  |
| 1  | 2.015516000  | 2.574394000  | -1.054622000 |
| 1  | -2.181679000 | -2.479187000 | 0.947824000  |
| 1  | -2.049072000 | 2.719652000  | 0.761315000  |
| 1  | 2.154404000  | -2.236070000 | -1.197051000 |
| 1  | 2.026331000  | -2.704455000 | 0.893653000  |
| 1  | 2.247012000  | 2.391642000  | 1.058631000  |
| 1  | -2.243298000 | 2.166889000  | -1.289196000 |
| 1  | -1.966432000 | -2.530790000 | -1.178800000 |
| 1  | -0.187598000 | 0.137172000  | 3.012118000  |
| 8  | 0.170414000  | -0.063008000 | -1.997898000 |
| 1  | -0.020691000 | 0.740561000  | -2.494830000 |

E(RB3LYP) = -1709.824718

|                                              |                             |
|----------------------------------------------|-----------------------------|
| Zero-point correction=                       | 0.217789 (Hartree/Particle) |
| Thermal correction to Energy=                | 0.235264                    |
| Thermal correction to Enthalpy=              | 0.236208                    |
| Thermal correction to Gibbs Free Energy=     | 0.172642                    |
| Sum of electronic and zero-point Energies=   | -1709.606930                |
| Sum of electronic and thermal Energies=      | -1709.589455                |
| Sum of electronic and thermal Enthalpies=    | -1709.588511                |
| Sum of electronic and thermal Free Energies= | -1709.652077                |
